# Supplementary material
Source: publisher figshare collection journal article supplement (https://frontiersin.figshare.com/ndownloader/files/22315902)
Supplement: Supplementary file 1 [file 22315902]

## Sheet: CRNS Data
Constants
Ref. Temp (Deg. C)	25
Ref. Pressure (hPa)	982
Ref. RH (%)	0
Scaling Factor	1.16
Temperature Lapse Rate (gamma)	6.7
High-energy attenuation, lambda (g/cm^2)	130
Lattice Water (g/g)	0.02
Soil Organic Carbon (g/g)	0.005
Dry Bulk Density (g/cm^3)	1.42
Year	Month	Day	Hour	N0 (cph) corrected for biomass (Franz 2015)	Air Temperature (Deg C), Missing data set to Standard Atm.	Air Pressure (hPa)	Relative Humidity (%)	Moderated Corrected Counts (cph)	MA 8 hr corrected counts (cph)	SG 3rd order, 13 hr corrected counts (cph)	SWC hourly (cm^3/cm^3)	SWC MA 8hr (cm^3/cm^3)	SWC SG 3rd order 13 hr (cm^3/cm^3)
2013	12	14	0	1588.17	25	992.8	70	908.492	916.549	903.321	0.374775	0.360589	0.384266
2013	12	14	1	1588.17	25	993	70	947.527	916.57	894.539	0.312012	0.360552	0.401123
2013	12	14	2	1588.17	25	993.2	70	851.577	911.189	879.542	0.499958	0.369947	0.432283
2013	12	14	3	1588.17	25	993.3	70	855.946	909.59	868.928	0.488444	0.3728	0.456366
2013	12	14	4	1588.17	25	993.6	70	806.722	894.38	863.575	0.6	0.401437	0.469225
2013	12	14	5	1588.17	25	993.85	70	867.632	887.487	872.81	0.459433	0.415384	0.447348
2013	12	14	6	1588.17	25	994.1	70	928.542	883.972	880.479	0.340725	0.422748	0.430243
2013	12	14	7	1588.17	25	994.4	70	888.12	881.82	898.554	0.414076	0.427344	0.393298
2013	12	14	8	1588.17	25	995.2	70	903.612	881.21	920.85	0.383724	0.428659	0.353299
2013	12	14	9	1588.17	25	995.4	70	949.315	881.433	934.577	0.309464	0.428176	0.331254
2013	12	14	10	1588.17	25	995.3	70	961.933	895.228	944.305	0.292184	0.399766	0.316668
2013	12	14	11	1588.17	25	995.3	70	940.604	905.81	938.826	0.322122	0.379659	0.324782
2013	12	14	12	1588.17	25	995.3	70	961.141	925.112	932.899	0.293234	0.34626	0.333853
2013	12	14	13	1588.17	25	995.2	70	898.368	928.954	931.721	0.393655	0.340067	0.335695
2013	12	14	14	1588.17	25	995.6	70	925.665	928.595	923.636	0.345361	0.340641	0.348678
2013	12	14	15	1588.17	25	996.2	70	907.109	930.968	915.132	0.377284	0.336877	0.363032
2013	12	14	16	1588.17	25	996.8	70	902.575	930.839	912.479	0.385662	0.337081	0.367667
2013	12	14	17	1588.17	25	997.1	70	918.14	926.942	908.025	0.357869	0.343294	0.37562
2013	12	14	18	1588.17	25	997.3	70	922.117	921.965	922.759	0.351187	0.351441	0.350125
2013	12	14	19	1588.17	25	998.2	70	925.305	920.053	934.162	0.345946	0.354636	0.331894
2013	12	14	20	1588.17	25	998.7	70	935.253	916.817	938.948	0.330213	0.360129	0.324599
2013	12	14	21	1588.17	25	999.2	70	938.28	921.806	944.453	0.325605	0.351705	0.316451
2013	12	14	22	1588.17	25	999.7	70	941.306	923.761	943.636	0.321078	0.348473	0.317645
2013	12	14	23	1588.17	25	999.8	70	1030.65	939.203	936.576	0.21548	0.324216	0.328189
2013	12	15	0	1588.17	25	999.7	70	881.084	936.517	937.313	0.42893	0.32828	0.327069
2013	12	15	1	1588.17	25	999.8	70	924.454	937.306	933.625	0.347336	0.327079	0.332726
2013	12	15	2	1588.17	25	999.7	70	910.994	935.916	932.307	0.370294	0.329198	0.334778
2013	12	15	3	1588.17	25	999.4	70	906.275	933.537	924.686	0.378807	0.332862	0.346955
2013	12	15	4	1588.17	25	999.6	70	923.262	932.038	915.953	0.349294	0.335198	0.361613
2013	12	15	5	1588.17	25	1000	70	965.019	935.38	906.372	0.288135	0.330018	0.378629
2013	12	15	6	1588.17	25	999.8	70	900.761	930.312	914.268	0.389081	0.337912	0.364532
2013	12	15	7	1588.17	25	1000.2	70	915.696	915.943	905.626	0.362058	0.361631	0.379998
2013	12	15	8	1588.17	25	1000	70	864.114	913.822	901.12	0.467908	0.365312	0.388402
2013	12	15	9	1588.17	25	1000.3	70	893.937	910.007	898.304	0.402316	0.372053	0.393778
2013	12	15	10	1588.17	25	1000.2	70	895.718	908.098	891.488	0.398805	0.375488	0.407211
2013	12	15	11	1588.17	25	999.5	70	907.488	908.249	896.526	0.376594	0.375214	0.397225
2013	12	15	12	1588.17	25	999.5	70	892.956	904.461	904.381	0.404266	0.382147	0.382294
2013	12	15	13	1588.17	25	999.7	70	912.867	897.942	911.7	0.366985	0.394477	0.369042
2013	12	15	14	1588.17	25	996.375	70	925.919	901.087	920.629	0.344948	0.388464	0.353668
2013	12	15	15	1588.17	25	996.625	70	913.192	900.774	921.989	0.366413	0.389057	0.3514
2013	12	15	16	1588.17	25	999.5	70	962.184	913.033	926.234	0.291852	0.366693	0.344438
2013	12	15	17	1588.17	25	999.2	70	894.581	913.113	929.47	0.401041	0.366552	0.339246
2013	12	15	18	1588.17	25	999.7	70	943.874	919.133	929.197	0.317297	0.356187	0.339681
2013	12	15	19	1588.17	25	1000	70	916.939	920.314	923.933	0.35992	0.354197	0.348189
2013	12	15	20	1588.17	25	1000	70	924.138	924.212	920.458	0.347854	0.347733	0.353956
2013	12	15	21	1588.17	25	1000.2	70	930.183	926.376	915.581	0.338117	0.344207	0.362256
2013	12	15	22	1588.17	25	1000.55	70	912.108	924.65	910.965	0.36832	0.347015	0.370345
2013	12	15	23	1588.17	25	1000.9	70	894.034	922.255	920.116	0.402122	0.350959	0.354529
2013	12	16	0	1588.17	25	1001	70	911.332	915.899	919.819	0.369693	0.361708	0.355029
2013	12	16	1	1588.17	25	1001.1	70	924.137	919.593	923.315	0.347856	0.35541	0.349205
2013	12	16	2	1588.17	25	1001	70	916.261	916.141	918.737	0.361083	0.361289	0.356857
2013	12	16	3	1588.17	25	1000.9	70	948.5	920.087	916.605	0.310623	0.354579	0.360492
2013	12	16	4	1588.17	25	1001	70	952.29	923.606	917.622	0.305281	0.348728	0.358752
2013	12	16	5	1588.17	25	1000.8	70	897.494	919.52	923.906	0.395343	0.355533	0.348233
2013	12	16	6	1588.17	25	1001.05	70	895.016	917.383	926.83	0.400184	0.35916	0.343475
2013	12	16	7	1588.17	25	1001.3	70	892.537	917.196	927.884	0.405105	0.35948	0.341779
2013	12	16	8	1588.17	25	1001.4	70	942.688	921.115	928.097	0.319036	0.352856	0.341436
2013	12	16	9	1588.17	25	1001.4	70	953.283	924.759	921.556	0.3039	0.346837	0.352121
2013	12	16	10	1588.17	25	1001	70	967.975	931.223	918.485	0.284319	0.336476	0.357283
2013	12	16	11	1588.17	25	1000.1	70	920.13	927.677	932.615	0.354506	0.342111	0.334296
2013	12	16	12	1588.17	25	999.6	70	905.095	921.777	939.262	0.380975	0.351752	0.324128
2013	12	16	13	1588.17	25	999.6	70	906.699	922.928	940.109	0.378031	0.349845	0.322859
2013	12	16	14	1588.17	25	999.6	70	908.303	924.589	933.818	0.375116	0.347115	0.332427
2013	12	16	15	1588.17	25	999.9	70	961.596	933.221	933.031	0.29263	0.333352	0.333647
2013	12	16	16	1588.17	25	1000.2	70	1014.89	942.246	931.954	0.230875	0.319687	0.335329
2013	12	16	17	1588.17	25	1000.7	70	916.655	937.668	936.693	0.360406	0.326531	0.328011
2013	12	16	18	1588.17	25	1001	70	906.342	929.964	937.297	0.378683	0.338463	0.327093
2013	12	16	19	1588.17	25	1001	70	909.732	928.664	926.498	0.372544	0.34053	0.34401
2013	12	16	20	1588.17	25	1001.1	70	928.933	931.644	920.688	0.340101	0.335815	0.353571
2013	12	16	21	1588.17	25	1001	70	911.737	932.273	912.265	0.368976	0.334829	0.368043
2013	12	16	22	1588.17	25	1000.7	70	928.166	934.756	915.68	0.341326	0.330977	0.362086
2013	12	16	23	1588.17	25	1000.45	70	910.636	928.386	926.279	0.37093	0.340974	0.344364
2013	12	17	0	1588.17	25	1000.2	70	893.106	913.164	922.154	0.403968	0.366463	0.351127
2013	12	17	1	1588.17	25	999.9	70	969.291	919.743	923.849	0.282639	0.355157	0.348328
2013	12	17	2	1588.17	25	999.7	70	929.294	922.612	924.741	0.339526	0.350367	0.346867
2013	12	17	3	1588.17	25	999.3	70	938.614	926.222	919.553	0.325101	0.344456	0.355477
2013	12	17	4	1588.17	25	999.2	70	880.28	920.141	914.709	0.430675	0.354488	0.363766
2013	12	17	5	1588.17	25	999.1	70	891.238	917.578	920.353	0.407715	0.358827	0.354131
2013	12	17	6	1588.17	25	999.1	70	954.854	920.914	911.784	0.301731	0.353192	0.368893
2013	12	17	7	1588.17	25	999.5	70	895.329	919.001	895.912	0.399567	0.35641	0.398424
2013	12	17	8	1588.17	25	999.7	70	871.292	916.274	894.012	0.450846	0.361061	0.402167
2013	12	17	9	1588.17	25	999.6	70	932.922	911.728	905.862	0.333818	0.368992	0.379563
2013	12	17	10	1588.17	25	999.3	70	926.439	911.371	908.602	0.344106	0.369624	0.374576
2013	12	17	11	1588.17	25	998.6	70	830.795	897.894	912.019	0.560466	0.394571	0.368477
2013	12	17	12	1588.17	25	998	70	906.264	901.142	909.582	0.378825	0.38836	0.372814
2013	12	17	13	1588.17	25	997.8	70	961.15	909.881	908.584	0.293222	0.372279	0.374609
2013	12	17	14	1588.17	25	997.8	70	975.727	912.49	909.55	0.274589	0.367647	0.372871
2013	12	17	15	1588.17	25	997.9	70	845.777	906.296	907.544	0.515854	0.378768	0.376492
2013	12	17	16	1588.17	25	997.8	70	934.955	914.254	913.418	0.330671	0.364558	0.366018
2013	12	17	17	1588.17	25	997.6	70	866.374	905.935	922.85	0.462439	0.379429	0.349973
2013	12	17	18	1588.17	25	997.3	70	886.412	900.932	918.007	0.417616	0.388757	0.358097
2013	12	17	19	1588.17	25	997.1	70	964.033	917.587	905.161	0.289421	0.358812	0.380852
2013	12	17	20	1588.17	25	996.9	70	931.41	920.73	908.9	0.336183	0.3535	0.37404
2013	12	17	21	1588.17	25	996.8	70	924.925	916.202	920.587	0.346565	0.361186	0.35374
2013	12	17	22	1588.17	25	996.7	70	918.441	909.041	912.075	0.357358	0.373786	0.368379
2013	12	17	23	1588.17	25	996.25	70	887.34	914.236	913.458	0.415687	0.364588	0.365948
2013	12	18	0	1588.17	25	995.8	70	856.24	904.397	908.487	0.487685	0.382265	0.374785
2013	12	18	1	1588.17	25	995.7	70	962.503	916.413	904.333	0.29143	0.360822	0.382383
2013	12	18	2	1588.17	25	995.3	70	908.791	919.21	910.914	0.374236	0.356055	0.370435
2013	12	18	3	1588.17	25	994.7	70	890.299	909.994	917.269	0.409617	0.372077	0.359355
2013	12	18	4	1588.17	25	995.2	70	933.299	910.23	925.8	0.333232	0.371655	0.345141
2013	12	18	5	1588.17	25	995.2	70	944.501	912.677	934.033	0.316382	0.367318	0.332094
2013	12	18	6	1588.17	25	995.25	70	939.633	915.326	939.176	0.323571	0.362697	0.324257
2013	12	18	7	1588.17	25	995.3	70	934.765	921.254	935.736	0.330965	0.352624	0.329473
2013	12	18	8	1588.17	25	995.5	70	935.746	931.192	937.713	0.329458	0.336525	0.326462
2013	12	18	9	1588.17	25	995.7	70	936.727	927.97	929.824	0.32796	0.34164	0.338686
2013	12	18	10	1588.17	25	995.5	70	925.135	930.013	918.362	0.346223	0.338385	0.357492
2013	12	18	11	1588.17	25	994.9	70	924.316	934.265	913.038	0.347562	0.331735	0.366684
2013	12	18	12	1588.17	25	994.35	70	896.374	929.649	902.638	0.397522	0.338962	0.385542
2013	12	18	13	1588.17	25	993.8	70	868.431	920.141	894.908	0.457539	0.354488	0.400395
2013	12	18	14	1588.17	25	993.6	70	886.186	913.46	892.718	0.418089	0.365944	0.404743
2013	12	18	15	1588.17	25	993.4	70	914.039	910.869	895.846	0.364932	0.370515	0.398554
2013	12	18	16	1588.17	25	993.1	70	905.39	907.075	902.86	0.380431	0.377346	0.385127
2013	12	18	17	1588.17	25	992.6	70	869.877	898.718	908.815	0.45414	0.392981	0.374193
2013	12	18	18	1588.17	25	992.2	70	931.116	899.466	916.763	0.336645	0.391548	0.360222
2013	12	18	19	1588.17	25	991.4	70	944.654	902.008	915.201	0.316159	0.386725	0.362913
2013	12	18	20	1588.17	25	990.9	70	930.226	906.24	911.89	0.338048	0.37887	0.368706
2013	12	18	21	1588.17	25	989.95	70	909.447	911.367	907.687	0.373056	0.369631	0.376233
2013	12	18	22	1588.17	25	989	70	888.669	911.677	905.841	0.412947	0.369082	0.379603
2013	12	18	23	1588.17	25	987.9	70	890.103	908.685	904.877	0.410015	0.374427	0.381378
2013	12	19	0	1588.17	25	987.3	70	869.713	904.226	898.787	0.454523	0.382583	0.39285
2013	12	19	1	1588.17	25	995.913	70	924.556	911.06	898.879	0.347168	0.370175	0.392673
2013	12	19	2	1588.17	25	995.775	70	905.174	907.818	901.063	0.38083	0.375995	0.38851
2013	12	19	3	1588.17	25	984.7	70	911.736	903.703	907.801	0.368978	0.383554	0.376026
2013	12	19	4	1588.17	25	984.2	70	922.193	902.699	915.437	0.351062	0.385429	0.362504
2013	12	19	5	1588.17	25	984.2	70	915.973	903.515	920.249	0.361579	0.383905	0.354307
2013	12	19	6	1588.17	25	984.2	70	909.753	906.15	924.905	0.372507	0.379035	0.346598
2013	12	19	7	1588.17	25	984.5	70	911.045	908.768	916.768	0.370203	0.374278	0.360212
2013	12	19	8	1588.17	25	984.6	70	938.994	917.428	917.536	0.324529	0.359083	0.358898
2013	12	19	9	1588.17	25	984.4	70	923.97	917.355	910.741	0.348129	0.359208	0.370744
2013	12	19	10	1588.17	25	984.2	70	908.945	917.826	902.61	0.373958	0.358404	0.385596
2013	12	19	11	1588.17	25	984.1	70	900.106	916.372	902.96	0.390327	0.360892	0.38494
2013	12	19	12	1588.17	25	983.9	70	867.934	909.59	907.166	0.458716	0.3728	0.377179
2013	12	19	13	1588.17	25	984.4	70	920.152	910.112	909.464	0.35447	0.371865	0.373026
2013	12	19	14	1588.17	25	985.2	70	882.881	906.753	911.087	0.425069	0.377932	0.370128
2013	12	19	15	1588.17	25	985.7	70	926.099	908.635	921.786	0.344656	0.374517	0.351738
2013	12	19	16	1588.17	25	986.2	70	969.317	912.425	926.917	0.282606	0.367761	0.343334
2013	12	19	17	1588.17	25	986.1	70	941.783	914.652	928.96	0.320371	0.363865	0.340058
2013	12	19	18	1588.17	25	986	70	914.25	915.315	933.587	0.364565	0.362716	0.332784
2013	12	19	19	1588.17	25	986.2	70	922.073	918.061	923.081	0.351261	0.358004	0.349591
2013	12	19	20	1588.17	25	986.4	70	929.896	925.806	912.403	0.338571	0.345131	0.367801
2013	12	19	21	1588.17	25	986.7	70	876.485	920.348	896.507	0.439037	0.35414	0.397262
2013	12	19	22	1588.17	25	996.05	70	900.947	922.606	891.724	0.388729	0.350377	0.406736
2013	12	19	23	1588.17	25	995.712	70	908.499	920.406	898.576	0.374762	0.354043	0.393256
2013	12	20	0	1588.17	25	986.7	70	847.072	905.126	903.801	0.512242	0.380918	0.383372
2013	12	20	1	1588.17	25	986.85	70	891.657	898.86	905.801	0.406871	0.392709	0.379676
2013	12	20	2	1588.17	25	987	70	936.241	901.609	905.898	0.328701	0.387478	0.379496
2013	12	20	3	1588.17	25	987	70	962.628	906.678	911.143	0.291267	0.378069	0.370028
2013	12	20	4	1588.17	25	987.5	70	924.972	906.063	911.89	0.346488	0.379195	0.368705
2013	12	20	5	1588.17	25	988	70	887.317	907.417	915.118	0.415735	0.376723	0.363057
2013	12	20	6	1588.17	25	988.65	70	889.168	905.944	912.515	0.411923	0.379412	0.367603
2013	12	20	7	1588.17	25	989.3	70	891.019	903.759	910.221	0.408158	0.383449	0.37167
2013	12	20	8	1588.17	25	990.3	70	926.686	913.711	907.208	0.343707	0.365505	0.377102
2013	12	20	9	1588.17	25	990.8	70	921.266	917.412	911.772	0.352603	0.35911	0.368914
2013	12	20	10	1588.17	25	991	70	912.043	914.387	922.933	0.368435	0.364325	0.349836
2013	12	20	11	1588.17	25	991.5	70	901.513	906.748	924.157	0.387658	0.377941	0.347822
2013	12	20	12	1588.17	25	992.7	70	978.504	913.44	924.578	0.271199	0.36598	0.347132
2013	12	20	13	1588.17	25	993.5	70	912.351	916.569	922.403	0.367891	0.360555	0.350713
2013	12	20	14	1588.17	25	995	70	928.231	921.452	918.849	0.341222	0.352294	0.356667
2013	12	20	15	1588.17	25	996.15	70	901.075	922.709	917.476	0.388486	0.350207	0.359001
2013	12	20	16	1588.17	25	997.3	70	873.919	916.113	912.922	0.444817	0.361339	0.366887
2013	12	20	17	1588.17	25	998.6	70	937.224	918.108	904.719	0.327204	0.357925	0.38167
2013	12	20	18	1588.17	25	992.35	70	909.861	917.835	901.107	0.372313	0.358389	0.388427
2013	12	20	19	1588.17	25	992	70	911.068	919.029	909.792	0.370162	0.356362	0.372437
2013	12	20	20	1588.17	25	991.8	70	896.08	908.726	913.032	0.398095	0.374353	0.366694
2013	12	20	21	1588.17	25	991.538	70	892.146	906.201	908.622	0.405887	0.378942	0.374541
2013	12	20	22	1588.17	25	1000.7	70	912.065	904.18	903.097	0.368395	0.382668	0.384683
2013	12	20	23	1588.17	25	1001.2	70	948.578	910.118	899.424	0.31051	0.371855	0.391629
2013	12	21	0	1588.17	25	1001.1	70	900.723	913.468	898.306	0.389154	0.36593	0.393775
2013	12	21	1	1588.17	25	1001.2	70	874.773	905.662	905.793	0.442882	0.379931	0.37969
2013	12	21	2	1588.17	25	1001.1	70	846.369	897.725	903.014	0.514199	0.394896	0.384839
2013	12	21	3	1588.17	25	1001.3	70	925.846	899.573	898.495	0.345066	0.391344	0.39341
2013	12	21	4	1588.17	25	989.562	70	939.58	905.01	898.237	0.32365	0.381131	0.393907
2013	12	21	5	1588.17	25	989.525	70	891.913	904.981	900.018	0.406356	0.381185	0.390494
2013	12	21	6	1588.17	25	1001.7	70	940.749	908.566	910.166	0.321906	0.374641	0.371769
2013	12	21	7	1588.17	25	1001.7	70	845.015	895.621	917.494	0.517995	0.398994	0.35897
2013	12	21	8	1588.17	25	1002	70	923.25	898.437	920.618	0.349313	0.393522	0.353688
2013	12	21	9	1588.17	25	1002.2	70	946.98	907.463	914.72	0.312796	0.376639	0.363747
2013	12	21	10	1588.17	25	1001.5	70	917.901	916.404	915.026	0.358276	0.360837	0.363215
2013	12	21	11	1588.17	25	1000.6	70	926.051	916.43	924.788	0.344733	0.360793	0.346789
2013	12	21	12	1588.17	25	999.6	70	918.769	913.829	918.253	0.356803	0.3653	0.357678
2013	12	21	13	1588.17	25	999.2	70	912.793	916.439	923.73	0.367114	0.360778	0.348523
2013	12	21	14	1588.17	25	998.8	70	906.817	912.197	912.668	0.377815	0.368163	0.367333
2013	12	21	15	1588.17	25	999	70	914.538	920.887	901.914	0.364064	0.353236	0.386903
2013	12	21	16	1588.17	25	999	70	922.866	920.839	898.908	0.349947	0.353317	0.392616
2013	12	21	17	1588.17	25	999.4	70	849.807	908.693	891.836	0.504733	0.374413	0.406511
2013	12	21	18	1588.17	25	999	70	923.772	909.427	888.472	0.348455	0.373093	0.413351
2013	12	21	19	1588.17	25	998.6	70	865.547	901.864	887.109	0.464428	0.386998	0.416166
2013	12	21	20	1588.17	25	998	70	865.653	895.224	889.494	0.464174	0.399774	0.411257
2013	12	21	21	1588.17	25	997.7	70	909.547	894.818	884.937	0.372877	0.400573	0.420708
2013	12	21	22	1588.17	25	997.8	70	884.611	892.043	883.134	0.421395	0.406095	0.424529
2013	12	21	23	1588.17	25	997.5	70	907.976	891.222	902.75	0.375709	0.407747	0.385333
2013	12	22	0	1588.17	25	997	70	906.542	889.182	904.586	0.378318	0.411895	0.381915
2013	12	22	1	1588.17	25	996.5	70	905.108	896.094	917.909	0.380951	0.398067	0.358262
2013	12	22	2	1588.17	25	995.9	70	876.019	890.125	923.892	0.440079	0.40997	0.348257
2013	12	22	3	1588.17	25	995.6	70	951.118	900.822	920.044	0.306921	0.388966	0.35465
2013	12	22	4	1588.17	25	995.7	70	1003.71	918.079	918.699	0.242504	0.357973	0.35692
2013	12	22	5	1588.17	25	995.1	70	870.041	913.141	922.56	0.453755	0.366503	0.350454
2013	12	22	6	1588.17	25	995.1	70	929.855	918.796	924.321	0.338636	0.356756	0.347553
2013	12	22	7	1588.17	25	995.4	70	899.777	917.772	926.036	0.390953	0.358497	0.344759
2013	12	22	8	1588.17	25	995.6	70	882.273	914.738	916.725	0.426371	0.363716	0.360286
2013	12	22	9	1588.17	25	995.7	70	931.854	918.081	904.682	0.335486	0.35797	0.381737
2013	12	22	10	1588.17	25	994.6	70	963.343	928.997	907.013	0.290326	0.34	0.377458
2013	12	22	11	1588.17	25	993.3	70	888.819	921.209	914.711	0.412637	0.352698	0.363763
2013	12	22	12	1588.17	25	992.8	70	896.328	907.786	907.121	0.397611	0.376052	0.377262
2013	12	22	13	1588.17	25	992.4	70	861.666	906.739	900.893	0.473932	0.377957	0.388832
2013	12	22	14	1588.17	25	992	70	935.216	907.41	897.736	0.33027	0.376736	0.394875
2013	12	22	15	1588.17	25	992.2	70	920.374	909.984	887.512	0.354096	0.372094	0.415332
2013	12	22	16	1588.17	25	992.4	70	850.487	906.011	876.808	0.502893	0.37929	0.438316
2013	12	22	17	1588.17	25	992.3	70	873.05	898.66	886.894	0.446799	0.393093	0.416613
2013	12	22	18	1588.17	25	992.2	70	870.309	887.031	885.095	0.45313	0.416329	0.420376
2013	12	22	19	1588.17	25	991.8	70	911.997	889.928	880.96	0.368516	0.410371	0.4292
2013	12	22	20	1588.17	25	991.9	70	858.545	885.205	875.043	0.481773	0.420143	0.442272
2013	12	22	21	1588.17	25	991.8	70	873.106	886.635	881.349	0.446671	0.417151	0.428358
2013	12	22	22	1588.17	25	992	70	946.592	888.057	892.653	0.313354	0.414205	0.404871
2013	12	22	23	1588.17	25	991.3	70	846.85	878.867	897.355	0.51286	0.433762	0.395612
2013	12	23	0	1588.17	25	991.1	70	881.117	882.696	907.038	0.428861	0.425465	0.377412
2013	12	23	1	1588.17	25	991.3	70	924.038	889.069	906.716	0.348018	0.412126	0.377999
2013	12	23	2	1588.17	25	991.1	70	922.303	895.568	906.233	0.35088	0.399098	0.378882
2013	12	23	3	1588.17	25	990.9	70	920.568	896.64	895.554	0.353772	0.397003	0.399126
2013	12	23	4	1588.17	25	990.85	70	907.444	902.752	887.337	0.376674	0.385329	0.415695
2013	12	23	5	1588.17	25	990.8	70	894.32	905.404	891.296	0.401557	0.380406	0.407598
2013	12	23	6	1588.17	25	991.1	70	826.251	890.361	884.229	0.575119	0.409491	0.422202
2013	12	23	7	1588.17	25	991.5	70	852.525	891.07	878.019	0.497428	0.408054	0.435629
2013	12	23	8	1588.17	25	991.9	70	878.798	890.781	874.073	0.433913	0.40864	0.444468
2013	12	23	9	1588.17	25	992.2	70	914.316	889.565	880.829	0.36445	0.411111	0.429482
2013	12	23	10	1588.17	25	991.55	70	902.327	887.068	889.959	0.386127	0.416251	0.410308
2013	12	23	11	1588.17	25	990.9	70	890.338	883.29	893.813	0.409538	0.424197	0.402561
2013	12	23	12	1588.17	25	990.3	70	884.941	880.477	898.508	0.420699	0.430246	0.393386
2013	12	23	13	1588.17	25	989.9	70	886.27	879.471	889.008	0.417914	0.432439	0.412252
2013	12	23	14	1588.17	25	989.4	70	929.32	892.354	886.529	0.339485	0.40547	0.417374
2013	12	23	15	1588.17	25	988.9	70	865.87	894.023	879.919	0.46365	0.402146	0.431461
2013	12	23	16	1588.17	25	988.4	70	843.928	889.664	882.057	0.521074	0.41091	0.426835
2013	12	23	17	1588.17	25	987.6	70	882.529	885.69	882.914	0.425822	0.419125	0.424998
2013	12	23	18	1588.17	25	986.6	70	876.256	882.431	882.616	0.439549	0.426031	0.425635
2013	12	23	19	1588.17	25	986	70	925.928	886.88	884.508	0.344933	0.416642	0.421614
2013	12	23	20	1588.17	25	985.6	70	865.758	884.482	888.249	0.463921	0.421667	0.41381
2013	12	23	21	1588.17	25	985.5	70	908.107	887.212	892.139	0.375471	0.415953	0.405901
2013	12	23	22	1588.17	25	984.8	70	878.968	880.918	891.355	0.433541	0.42929	0.40748
2013	12	23	23	1588.17	25	984.15	70	890.507	883.998	890.253	0.409194	0.422693	0.40971
2013	12	24	0	1588.17	25	983.5	70	902.047	891.262	884.274	0.386653	0.407666	0.422108
2013	12	24	1	1588.17	25	983.2	70	881.821	891.174	888.718	0.427341	0.407845	0.412846
2013	12	24	2	1588.17	25	982.3	70	850.974	888.014	889.375	0.501578	0.414295	0.4115
2013	12	24	3	1588.17	25	981.8	70	904.792	885.372	885.684	0.381535	0.419794	0.419139
2013	12	24	4	1588.17	25	981.3	70	907.907	890.64	888.112	0.375834	0.408924	0.414093
2013	12	24	5	1588.17	25	980.8	70	865.972	885.373	884.553	0.463405	0.41979	0.421518
2013	12	24	6	1588.17	25	980.7	70	935.929	892.493	884.012	0.329178	0.405191	0.422663
2013	12	24	7	1588.17	25	980.6	70	827.65	884.636	885.037	0.570549	0.421342	0.420497
2013	12	24	8	1588.17	25	980.1	70	899.624	884.333	884.97	0.391246	0.421982	0.420638
2013	12	24	9	1588.17	25	979.5	70	887.784	885.079	884.753	0.41477	0.42041	0.421095
2013	12	24	10	1588.17	25	978.8	70	874.446	888.013	889.806	0.443622	0.414297	0.410619
2013	12	24	11	1588.17	25	977.9	70	902.907	887.777	897.268	0.385039	0.414783	0.395782
2013	12	24	12	1588.17	25	977.2	70	897.917	886.528	904.123	0.394524	0.417374	0.382773
2013	12	24	13	1588.17	25	976.3	70	918.175	893.054	918.761	0.35781	0.404072	0.356816
2013	12	24	14	1588.17	25	975.9	70	938.355	893.357	915.533	0.325492	0.403467	0.362339
2013	12	24	15	1588.17	25	975.4	70	912.76	903.996	916.444	0.367172	0.383009	0.36077
2013	12	24	16	1588.17	25	974.7	70	923.504	906.981	919.472	0.348895	0.377517	0.355614
2013	12	24	17	1588.17	25	974.1	70	933.716	912.722	920.668	0.332584	0.367238	0.353604
2013	12	24	18	1588.17	25	973.2	70	895.888	915.403	920.065	0.398472	0.362564	0.354616
2013	12	24	19	1588.17	25	973	70	893.426	914.218	913.157	0.40333	0.364621	0.366475
2013	12	24	20	1588.17	25	972.6	70	923.004	917.353	922.263	0.349719	0.359211	0.350945
2013	12	24	21	1588.17	25	971.8	70	949.467	921.265	923.962	0.309249	0.352606	0.348142
2013	12	24	22	1588.17	25	971.4	70	926.607	919.796	921.251	0.343834	0.355067	0.35263
2013	12	24	23	1588.17	25	971	70	903.748	918.67	922.433	0.383471	0.35697	0.350663
2013	12	25	0	1588.17	25	970.3	70	923.563	918.677	925.35	0.348798	0.356958	0.345872
2013	12	25	1	1588.17	25	970.1	70	982.261	924.745	923.529	0.266688	0.346859	0.348854
2013	12	25	2	1588.17	25	969.2	70	854.038	919.514	918.993	0.493428	0.355543	0.356423
2013	12	25	3	1588.17	25	968	70	914.189	922.109	914.895	0.364671	0.3512	0.363444
2013	12	25	4	1588.17	25	967.6	70	934.834	923.588	917.347	0.330858	0.348757	0.359222
2013	12	25	5	1588.17	25	967.4	70	916.947	919.523	920.166	0.359905	0.355528	0.354445
2013	12	25	6	1588.17	25	966.8	70	918.724	918.538	922.276	0.356878	0.357194	0.350925
2013	12	25	7	1588.17	25	966.95	70	916.729	920.16	917.265	0.36028	0.354455	0.359363
2013	12	25	8	1588.17	25	967.1	70	914.733	919.057	920.45	0.363724	0.356315	0.353969
2013	12	25	9	1588.17	25	966.7	70	932.524	912.84	910.415	0.334438	0.367032	0.371324
2013	12	25	10	1588.17	25	965.9	70	918.3	920.873	899.832	0.357597	0.353261	0.390849
2013	12	25	11	1588.17	25	964.8	70	896.975	918.721	893.419	0.396351	0.356884	0.403345
2013	12	25	12	1588.17	25	964.1	70	842.826	907.22	889.377	0.524223	0.377081	0.411496
2013	12	25	13	1588.17	25	963.7	70	885.184	903.249	887.949	0.420189	0.384399	0.414428
2013	12	25	14	1588.17	25	964.2	70	893.716	900.123	882.908	0.402753	0.390293	0.425011
2013	12	25	15	1588.17	25	964.3	70	868.384	894.08	877.672	0.457651	0.402031	0.436397
2013	12	25	16	1588.17	25	964.2	70	905.246	892.894	884.22	0.380695	0.40439	0.422221
2013	12	25	17	1588.17	25	964.3	70	910.835	890.183	895.891	0.370576	0.409852	0.398465
2013	12	25	18	1588.17	25	964.4	70	891.115	886.785	908.756	0.407963	0.41684	0.3743
2013	12	25	19	1588.17	25	964.5	70	871.395	883.588	908.347	0.450606	0.423563	0.375038
2013	12	25	20	1588.17	25	964.1	70	911.802	892.21	907.398	0.368861	0.40576	0.376757
2013	12	25	21	1588.17	25	964.2	70	954.057	900.819	904.858	0.30283	0.388972	0.381412
2013	12	25	22	1588.17	25	964.1	70	924.179	904.627	904.984	0.347786	0.38184	0.38118
2013	12	25	23	1588.17	25	963.7	70	898.293	908.365	906.167	0.3938	0.375004	0.379003
2013	12	26	0	1588.17	25	963.3	70	864.218	903.237	911.317	0.467653	0.384423	0.369721
2013	12	26	1	1588.17	25	963.15	70	887.086	900.268	908.716	0.416215	0.390018	0.374371
2013	12	26	2	1588.17	25	963	70	909.954	902.623	900.254	0.372148	0.385571	0.390045
2013	12	26	3	1588.17	25	962.9	70	945.279	911.858	898.797	0.315251	0.368761	0.39283
2013	12	26	4	1588.17	25	962.5	70	893.838	909.613	895.078	0.402511	0.372759	0.40006
2013	12	26	5	1588.17	25	961.9	70	903.626	903.309	891.433	0.383698	0.384288	0.407321
2013	12	26	6	1588.17	25	961.4	70	862.812	895.638	892.512	0.471097	0.398961	0.405155
2013	12	26	7	1588.17	25	975.688	70	886.179	894.124	884.717	0.418104	0.401945	0.421172
2013	12	26	8	1588.17	25	975.675	70	890.207	897.373	881.404	0.409804	0.395579	0.428239
2013	12	26	9	1588.17	25	961.8	70	836.187	891.01	880.204	0.543783	0.408176	0.43084
2013	12	26	10	1588.17	25	974.775	70	904.329	890.307	886.431	0.382392	0.409601	0.417578
2013	12	26	11	1588.17	25	974.15	70	924.245	887.678	891.882	0.347677	0.414989	0.406419
2013	12	26	12	1588.17	25	973.688	70	880.638	886.028	901.044	0.429898	0.418419	0.388545
2013	12	26	13	1588.17	25	960.9	70	916.993	887.699	905.916	0.359827	0.414946	0.379465
2013	12	26	14	1588.17	25	961.6	70	897.073	891.981	911.827	0.39616	0.406218	0.368818
2013	12	26	15	1588.17	25	962.45	70	909.637	894.914	913.514	0.372715	0.400385	0.365849
2013	12	26	16	1588.17	25	963.3	70	922.201	898.913	903.57	0.351048	0.392607	0.383801
2013	12	26	17	1588.17	25	965.15	70	912.905	908.503	902.681	0.366916	0.374756	0.385462
2013	12	26	18	1588.17	25	967	70	903.61	908.413	903.745	0.383727	0.374918	0.383476
2013	12	26	19	1588.17	25	968.45	70	888.53	903.948	900.655	0.413231	0.383097	0.389282
2013	12	26	20	1588.17	25	969.9	70	873.451	903.05	901.283	0.445883	0.384772	0.388093
2013	12	26	21	1588.17	25	971	70	896.704	900.514	893.457	0.396878	0.38955	0.403269
2013	12	26	22	1588.17	25	972.4	70	920.673	903.464	888.295	0.353595	0.383999	0.413716
2013	12	26	23	1588.17	25	973.2	70	891.383	901.182	889.003	0.407423	0.388284	0.412261
2013	12	27	0	1588.17	25	974.1	70	897.455	898.089	895.791	0.395419	0.394193	0.398662
2013	12	27	1	1588.17	25	975.05	70	879.914	893.965	894.84	0.431472	0.40226	0.40053
2013	12	27	2	1588.17	25	976	70	862.372	888.81	897.815	0.472184	0.412656	0.394722
2013	12	27	3	1588.17	25	972.275	70	912.442	891.799	893.152	0.367731	0.406584	0.403876
2013	12	27	4	1588.17	25	972.125	70	921.682	897.828	896.84	0.351911	0.394697	0.396614
2013	12	27	5	1588.17	25	972	70	912.834	899.844	895.127	0.367042	0.390825	0.399964
2013	12	27	6	1588.17	25	978.9	70	859.657	892.217	898.903	0.478959	0.405745	0.392626
2013	12	27	7	1588.17	25	979.8	70	921.961	896.039	906.544	0.351448	0.398175	0.378313
2013	12	27	8	1588.17	25	980.3	70	879.332	893.774	903.534	0.432743	0.402639	0.383869
2013	12	27	9	1588.17	25	980.1	70	920.493	898.846	896.57	0.353897	0.392735	0.397139
2013	12	27	10	1588.17	25	980.1	70	859.714	898.514	885.968	0.478816	0.393374	0.418543
2013	12	27	11	1588.17	25	979.4	70	941.63	902.163	881.737	0.320598	0.386435	0.427522
2013	12	27	12	1588.17	25	978.85	70	887.118	897.842	883.282	0.416148	0.39467	0.424214
2013	12	27	13	1588.17	25	978.3	70	832.606	887.814	874.974	0.554779	0.414708	0.442428
2013	12	27	14	1588.17	25	977.6	70	869.83	889.085	872.847	0.45425	0.412092	0.447264
2013	12	27	15	1588.17	25	977.2	70	845.073	879.474	879.999	0.517833	0.432431	0.431286
2013	12	27	16	1588.17	25	977.5	70	916.883	884.168	891.37	0.360016	0.422331	0.40745
2013	12	27	17	1588.17	25	977.3	70	912.736	883.199	894.663	0.367214	0.424391	0.400879
2013	12	27	18	1588.17	25	978	70	884.5	886.297	907.9	0.421629	0.417857	0.375846
2013	12	27	19	1588.17	25	978.9	70	924.039	884.098	917.242	0.348016	0.42248	0.359402
2013	12	27	20	1588.17	25	978.8	70	979.283	895.619	919.224	0.270256	0.398999	0.356032
2013	12	27	21	1588.17	25	978.9	70	893.793	903.267	924.724	0.402602	0.384366	0.346893
2013	12	27	22	1588.17	25	978.45	70	902.876	907.398	924.334	0.385097	0.376758	0.347533
2013	12	27	23	1588.17	25	978	70	911.96	915.759	928.567	0.368582	0.361949	0.340685
2013	12	28	0	1588.17	25	978.1	70	927.529	917.089	930.891	0.342349	0.359662	0.336999
2013	12	28	1	1588.17	25	978.2	70	943.097	920.885	928.204	0.318434	0.353241	0.341265
2013	12	28	2	1588.17	25	977.4	70	947.506	928.76	925.926	0.312041	0.340376	0.344937
2013	12	28	3	1588.17	25	976.9	70	930.564	929.576	925.107	0.337514	0.339078	0.346269
2013	12	28	4	1588.17	25	976.4	70	913.623	921.369	913.466	0.365659	0.352433	0.365934
2013	12	28	5	1588.17	25	976	70	908.931	923.261	906.313	0.373984	0.349296	0.378737
2013	12	28	6	1588.17	25	975.6	70	904.239	923.431	906.837	0.382558	0.349015	0.377779
2013	12	28	7	1588.17	25	975.4	70	878.375	919.233	905.023	0.434844	0.356017	0.381108
2013	12	28	8	1588.17	25	975.2	70	867.138	911.684	907.29	0.46061	0.369069	0.376953
2013	12	28	9	1588.17	25	974.5	70	920.283	908.832	911.658	0.35425	0.374161	0.369115
2013	12	28	10	1588.17	25	974.3	70	964.855	911.001	918.948	0.288348	0.370281	0.356499
2013	12	28	11	1588.17	25	974.5	70	955.47	914.114	922.417	0.300886	0.364801	0.35069
2013	12	28	12	1588.17	25	974.6	70	894.689	911.748	921.78	0.400828	0.368957	0.351747
2013	12	28	13	1588.17	25	974.9	70	920.325	913.172	927.714	0.354178	0.366449	0.342051
2013	12	28	14	1588.17	25	975.1	70	912.49	914.203	923.261	0.367647	0.364646	0.349295
2013	12	28	15	1588.17	25	974.7	70	920.769	919.502	910.731	0.353434	0.355562	0.370762
2013	12	28	16	1588.17	25	974.4	70	891.654	922.567	900.975	0.406878	0.350442	0.388676
2013	12	28	17	1588.17	25	974.2	70	902.825	920.385	900.204	0.385193	0.354079	0.390139
2013	12	28	18	1588.17	25	973.8	70	939.57	917.224	906.228	0.323665	0.359432	0.378893
2013	12	28	19	1588.17	25	973.7	70	869.845	906.521	904.825	0.454215	0.378356	0.381474
2013	12	28	20	1588.17	25	973.9	70	892.671	906.269	905.177	0.404836	0.378818	0.380823
2013	12	28	21	1588.17	25	974.8	70	911.199	905.128	913.945	0.369929	0.380914	0.365097
2013	12	28	22	1588.17	25	975.7	70	929.727	907.282	913.412	0.338838	0.376967	0.366027
2013	12	28	23	1588.17	25	976.5	70	931.798	908.661	913.679	0.335574	0.37447	0.365561
2013	12	29	0	1588.17	25	977.1	70	905.768	910.425	916.383	0.379735	0.371306	0.360875
2013	12	29	1	1588.17	25	979.2	70	919.645	912.528	921.91	0.355322	0.36758	0.351531
2013	12	29	2	1588.17	25	980.2	70	942.737	912.924	917.999	0.318964	0.366884	0.35811
2013	12	29	3	1588.17	25	981.3	70	859.738	911.66	914.802	0.478755	0.369111	0.363605
2013	12	29	4	1588.17	25	982	70	944.432	918.131	912.971	0.316482	0.357886	0.366801
2013	12	29	5	1588.17	25	982.7	70	921.83	919.459	916.695	0.351664	0.355635	0.360338
2013	12	29	6	1588.17	25	983.4	70	899.228	915.647	917.264	0.392002	0.362142	0.359364
2013	12	29	7	1588.17	25	984.2	70	914.529	913.488	914.288	0.364079	0.365894	0.364498
2013	12	29	8	1588.17	25	984.7	70	923.024	915.645	911.576	0.349687	0.362145	0.369261
2013	12	29	9	1588.17	25	985.55	70	919.41	915.616	912.24	0.355719	0.362195	0.368087
2013	12	29	10	1588.17	25	986.4	70	915.796	912.248	899.598	0.361884	0.368072	0.391296
2013	12	29	11	1588.17	25	986.6	70	874.523	914.097	895.964	0.443448	0.364832	0.398323
2013	12	29	12	1588.17	25	987	70	893.721	907.758	896.934	0.402744	0.376104	0.396431
2013	12	29	13	1588.17	25	987.7	70	888.726	903.62	897.56	0.412829	0.383709	0.395216
2013	12	29	14	1588.17	25	988.5	70	887.747	902.184	898.471	0.414846	0.386394	0.393456
2013	12	29	15	1588.17	25	989.2	70	887.429	898.797	886.806	0.415504	0.39283	0.416797
2013	12	29	16	1588.17	25	989.9	70	909.504	897.107	887.216	0.372953	0.396094	0.415945
2013	12	29	17	1588.17	25	990.7	70	926.305	897.969	889.527	0.344322	0.394425	0.411188
2013	12	29	18	1588.17	25	991.2	70	889.504	894.682	889.797	0.411236	0.400841	0.410639
2013	12	29	19	1588.17	25	991.7	70	852.703	891.955	893.966	0.496954	0.406271	0.402257
2013	12	29	20	1588.17	25	992.6	70	828.672	883.824	898.016	0.567242	0.423061	0.394333
2013	12	29	21	1588.17	25	993	70	962.298	893.02	901.666	0.291702	0.404138	0.38737
2013	12	29	22	1588.17	25	993.4	70	909.839	895.782	903.118	0.372354	0.398679	0.384644
2013	12	29	23	1588.17	25	993.6	70	925.124	900.494	906.693	0.34624	0.389589	0.378042
2013	12	30	0	1588.17	25	982.837	70	921.596	902.005	916.18	0.352054	0.386731	0.361224
2013	12	30	1	1588.17	25	983.3	70	911.252	900.124	922.763	0.369836	0.390293	0.350117
2013	12	30	2	1588.17	25	983.175	70	907.659	902.393	923.774	0.376282	0.386002	0.348451
2013	12	30	3	1588.17	25	994.9	70	902.887	908.666	908.146	0.385076	0.374461	0.3754
2013	12	30	4	1588.17	25	995.4	70	913.365	919.253	905.428	0.36611	0.355984	0.38036
2013	12	30	5	1588.17	25	995.9	70	923.843	914.446	903.515	0.348338	0.364224	0.383905
2013	12	30	6	1588.17	25	996.2	70	909.406	914.392	905.088	0.37313	0.364318	0.380988
2013	12	30	7	1588.17	25	996.6	70	898.483	911.061	907.485	0.393434	0.370174	0.376599
2013	12	30	8	1588.17	25	997.1	70	864.238	903.892	904.617	0.467605	0.383203	0.381858
2013	12	30	9	1588.17	25	981.57	70	915.642	904.44	909.151	0.362151	0.382185	0.373588
2013	12	30	10	1588.17	25	984.175	70	943.436	908.912	911.837	0.317938	0.374017	0.368799
2013	12	30	11	1588.17	25	983.95	70	916.799	910.651	914.885	0.36016	0.370903	0.363461
2013	12	30	12	1588.17	25	983.725	70	908.348	910.024	919.244	0.375036	0.372022	0.355998
2013	12	30	13	1588.17	25	983.725	70	904.597	907.618	922.381	0.381896	0.376357	0.35075
2013	12	30	14	1588.17	25	994.6	70	959.623	913.895	925.539	0.295259	0.365183	0.345565
2013	12	30	15	1588.17	25	994.3	70	908.708	915.174	917.66	0.374385	0.36296	0.358688
2013	12	30	16	1588.17	25	993.95	70	910.874	921.003	916.252	0.370508	0.353043	0.361099
2013	12	30	17	1588.17	25	993.6	70	913.039	920.678	916.875	0.366682	0.353587	0.36003
2013	12	30	18	1588.17	25	993.5	70	917.875	917.483	918.029	0.35832	0.35899	0.358059
2013	12	30	19	1588.17	25	993.2	70	920.47	917.942	918.367	0.353935	0.358207	0.357483
2013	12	30	20	1588.17	25	993.4	70	898.55	916.717	913.961	0.393306	0.3603	0.365068
2013	12	30	21	1588.17	25	983.65	70	930.686	919.978	911.845	0.337322	0.354762	0.368784
2013	12	30	22	1588.17	25	983.675	70	907.504	913.463	908.641	0.376565	0.365938	0.374506
2013	12	30	23	1588.17	25	992.4	70	925.374	915.546	906.32	0.345833	0.362316	0.378724
2013	12	31	0	1588.17	25	991.95	70	901.226	914.341	904.394	0.3882	0.364407	0.382271
2013	12	31	1	1588.17	25	991.5	70	877.078	909.845	904.493	0.437714	0.372342	0.382088
2013	12	31	2	1588.17	25	991.2	70	881.421	905.289	904.368	0.428202	0.380617	0.382318
2013	12	31	3	1588.17	25	991	70	927.471	906.164	900.799	0.342441	0.37901	0.389009
2013	12	31	4	1588.17	25	990.9	70	911.586	907.793	896.841	0.369242	0.376039	0.396611
2013	12	31	5	1588.17	25	990.6	70	906.437	904.762	899.443	0.37851	0.381589	0.391592
2013	12	31	6	1588.17	25	990.6	70	904.889	904.435	904.116	0.381355	0.382194	0.382786
2013	12	31	7	1588.17	25	990.9	70	890.197	900.038	911.591	0.409824	0.390455	0.369235
2013	12	31	8	1588.17	25	990.85	70	893.234	899.039	912.404	0.403712	0.392365	0.367798
2013	12	31	9	1588.17	25	990.8	70	896.271	901.438	905.751	0.397722	0.387799	0.379767
2013	12	31	10	1588.17	25	989.8	70	955.61	910.712	903.386	0.300694	0.370795	0.384144
2013	12	31	11	1588.17	25	989	70	907.503	908.216	904.253	0.376567	0.375274	0.382532
2013	12	31	12	1588.17	25	988.1	70	923.064	909.65	908.053	0.34962	0.372691	0.375568
2013	12	31	13	1588.17	25	987.5	70	877.392	906.02	913.429	0.437019	0.379274	0.365997
2013	12	31	14	1588.17	25	987.1	70	876.548	902.477	911.306	0.438896	0.385844	0.36974
2013	12	31	15	1588.17	25	986.8	70	918.894	906.064	919.313	0.35659	0.379192	0.355882
2013	12	31	16	1588.17	25	986.7	70	947.793	912.884	919.717	0.311631	0.366953	0.355201
2013	12	31	17	1588.17	25	986.6	70	940.18	918.373	924.022	0.322753	0.357474	0.348043
2013	12	31	18	1588.17	25	986.25	70	926.896	914.784	922.593	0.343368	0.363637	0.350399
2013	12	31	19	1588.17	25	985.9	70	913.611	915.547	929.429	0.365679	0.362314	0.339312
2013	12	31	20	1588.17	25	985.4	70	970.518	921.479	931.639	0.281083	0.352249	0.335823
2013	12	31	21	1588.17	25	984.9	70	872.193	920.829	920.892	0.448765	0.353334	0.353229
2013	12	31	22	1588.17	25	984.4	70	895.635	923.215	913.873	0.398967	0.349371	0.365223
2013	12	31	23	1588.17	25	984.3	70	923.748	923.822	909.261	0.348494	0.348372	0.37339
2014	1	1	0	1588.17	25	984.2	70	951.86	924.33	905.096	0.305881	0.347538	0.380972
2014	1	1	1	1588.17	25	984.3	70	905.186	919.956	904.736	0.380808	0.354799	0.381637
2014	1	1	2	1588.17	25	983.9	70	858.973	911.465	905.553	0.480687	0.369457	0.380131
2014	1	1	3	1588.17	25	983.8	70	913.637	911.469	914.246	0.365634	0.369451	0.364571
2014	1	1	4	1588.17	25	984	70	902.495	902.966	909.572	0.385811	0.384929	0.372833
2014	1	1	5	1588.17	25	984.3	70	919.03	908.82	907.826	0.35636	0.374183	0.37598
2014	1	1	6	1588.17	25	984.6	70	940.312	914.405	910.74	0.322557	0.364295	0.370746
2014	1	1	7	1588.17	25	985.8	70	921.705	914.15	918.817	0.351872	0.364739	0.356721
2014	1	1	8	1588.17	25	986.913	70	900.52	907.732	921.23	0.389539	0.37615	0.352664
2014	1	1	9	1588.17	25	984.03	70	907.018	907.961	926.176	0.377449	0.375735	0.344531
2014	1	1	10	1588.17	25	986.2	70	937.482	917.775	927.264	0.326812	0.358491	0.342775
2014	1	1	11	1588.17	25	985.7	70	929.699	919.783	925.537	0.338882	0.35509	0.345569
2014	1	1	12	1588.17	25	985.2	70	921.917	922.21	924.408	0.35152	0.351033	0.347411
2014	1	1	13	1588.17	25	984.8	70	931.943	923.825	928.712	0.335346	0.348368	0.340454
2014	1	1	14	1588.17	25	984.7	70	968.252	927.317	924.491	0.283964	0.342689	0.347276
2014	1	1	15	1588.17	25	984.5	70	875.291	921.515	916.448	0.441713	0.352188	0.360763
2014	1	1	16	1588.17	25	984.3	70	918.067	923.709	918.241	0.357995	0.348558	0.357698
2014	1	1	17	1588.17	25	984.1	70	918.044	925.087	921.015	0.358033	0.346302	0.353022
2014	1	1	18	1588.17	25	983.9	70	918.021	922.654	919.948	0.358072	0.350297	0.354812
2014	1	1	19	1588.17	25	982.9	70	885.204	917.092	917.368	0.420147	0.359657	0.359185
2014	1	1	20	1588.17	25	982.5	70	943.192	919.752	916.094	0.318295	0.355142	0.361371
2014	1	1	21	1588.17	25	981.9	70	977.053	925.39	922.016	0.272964	0.345807	0.351356
2014	1	1	22	1588.17	25	981.2	70	894.815	916.211	916.626	0.40058	0.36117	0.360456
2014	1	1	23	1588.17	25	980	70	892.705	918.387	917.792	0.404768	0.357449	0.358462
2014	1	2	0	1588.17	25	979.1	70	911.49	917.565	919.957	0.369413	0.358849	0.354797
2014	1	2	1	1588.17	25	978.4	70	916.298	917.347	922.301	0.36102	0.359221	0.350882
2014	1	2	2	1588.17	25	977.85	70	920.847	917.7	915.322	0.353305	0.358618	0.362703
2014	1	2	3	1588.17	25	977.3	70	925.395	922.724	917.903	0.345799	0.350181	0.358273
2014	1	2	4	1588.17	25	977	70	944.583	922.898	929.16	0.316263	0.349894	0.339739
2014	1	2	5	1588.17	25	977	70	927.872	916.751	929.86	0.341798	0.360243	0.338627
2014	1	2	6	1588.17	25	976.8	70	919.026	919.777	924.911	0.356368	0.3551	0.346588
2014	1	2	7	1588.17	25	976.6	70	910.18	921.961	923.868	0.371745	0.351446	0.348297
2014	1	2	8	1588.17	25	976.7	70	944.264	926.058	921.281	0.316727	0.344723	0.352579
2014	1	2	9	1588.17	25	976.9	70	921.752	926.74	924.24	0.351794	0.34362	0.347686
2014	1	2	10	1588.17	25	977.1	70	903.896	924.621	924.108	0.383195	0.347062	0.347902
2014	1	2	11	1588.17	25	977.5	70	914.991	923.32	925.675	0.363277	0.349197	0.345344
2014	1	2	12	1588.17	25	977.4	70	949.362	923.918	930.429	0.309397	0.348215	0.337727
2014	1	2	13	1588.17	25	977.3	70	932.936	924.551	935.604	0.333796	0.347177	0.329674
2014	1	2	14	1588.17	25	978.4	70	955.739	929.14	936.375	0.300517	0.339772	0.328496
2014	1	2	15	1588.17	25	979	70	911.273	929.277	937.269	0.369799	0.339554	0.327136
2014	1	2	16	1588.17	25	979.55	70	933.654	927.95	930.642	0.33268	0.341672	0.337391
2014	1	2	17	1588.17	25	980.1	70	956.036	932.236	926.979	0.300111	0.334888	0.343234
2014	1	2	18	1588.17	25	980.65	70	927.783	935.222	921.381	0.341941	0.330262	0.352412
2014	1	2	19	1588.17	25	981.2	70	899.53	933.289	921.924	0.391425	0.333247	0.351509
2014	1	2	20	1588.17	25	981.6	70	893.716	926.333	922.149	0.402754	0.344277	0.351135
2014	1	2	21	1588.17	25	981.5	70	908.358	923.261	927.316	0.375017	0.349295	0.34269
2014	1	2	22	1588.17	25	981.7	70	963.019	924.171	918.766	0.290751	0.347799	0.356807
2014	1	2	23	1588.17	25	982.3	70	922.024	925.515	919.463	0.351342	0.345604	0.355629
2014	1	3	0	1588.17	25	982.9	70	935.028	925.687	917.153	0.330559	0.345325	0.359554
2014	1	3	1	1588.17	25	983.05	70	918.685	921.018	915.916	0.356944	0.353018	0.361677
2014	1	3	2	1588.17	25	983.2	70	902.342	917.838	915.746	0.386097	0.358384	0.361972
2014	1	3	3	1588.17	25	983	70	870.043	914.152	911.267	0.453751	0.364735	0.369808
2014	1	3	4	1588.17	25	983	70	937.918	919.677	906.95	0.326153	0.355268	0.377572
2014	1	3	5	1588.17	25	982.8	70	875.918	915.622	910.231	0.440304	0.362185	0.371652
2014	1	3	6	1588.17	25	983.1	70	936.906	912.358	909.828	0.327687	0.367879	0.372373
2014	1	3	7	1588.17	25	983.3	70	936.366	914.151	912.761	0.32851	0.364738	0.36717
2014	1	3	8	1588.17	25	983	70	900.344	909.815	904.297	0.389873	0.372396	0.382451
2014	1	3	9	1588.17	25	983.2	70	907.022	908.357	903.522	0.377442	0.375018	0.38389
2014	1	3	10	1588.17	25	982.55	70	898.843	907.92	902.333	0.392741	0.37581	0.386115
2014	1	3	11	1588.17	25	981.9	70	890.664	910.498	910.233	0.408876	0.371177	0.371649
2014	1	3	12	1588.17	25	981.8	70	888.539	904.325	898.972	0.413214	0.382398	0.392494
2014	1	3	13	1588.17	25	981.7	70	868.1	903.348	902.969	0.458322	0.384215	0.384922
2014	1	3	14	1588.17	25	982.1	70	978.531	908.551	914.161	0.271166	0.374669	0.36472
2014	1	3	15	1588.17	25	982.7	70	941.163	909.151	921.619	0.32129	0.373588	0.352016
2014	1	3	16	1588.17	25	983.3	70	903.795	909.582	928.922	0.383383	0.372814	0.340119
2014	1	3	17	1588.17	25	983.8	70	872.972	905.326	928.254	0.446978	0.380549	0.341185
2014	1	3	18	1588.17	25	984.3	70	981.626	915.674	929.345	0.267444	0.362096	0.339446
2014	1	3	19	1588.17	25	984.3	70	947.095	922.728	927.125	0.312631	0.350176	0.342998
2014	1	3	20	1588.17	25	984.3	70	912.563	925.731	919.825	0.367518	0.345254	0.355019
2014	1	3	21	1588.17	25	984.4	70	905.561	930.413	924.103	0.380116	0.337752	0.347911
2014	1	3	22	1588.17	25	984.2	70	893.391	919.771	921.219	0.4034	0.35511	0.352682
2014	1	3	23	1588.17	25	984.3	70	946.419	920.428	917.523	0.313602	0.354006	0.358921
2014	1	4	0	1588.17	25	985.3	70	917.311	922.117	906.132	0.359283	0.351187	0.379067
2014	1	4	1	1588.17	25	986	70	918.397	927.796	909.573	0.357433	0.34192	0.37283
2014	1	4	2	1588.17	25	979.288	70	895.871	917.076	915.692	0.398505	0.359685	0.362063
2014	1	4	3	1588.17	25	978.8	70	886.508	909.503	916.604	0.417417	0.372956	0.360494
2014	1	4	4	1588.17	25	978.75	70	934.45	912.239	911.208	0.33145	0.36809	0.369913
2014	1	4	5	1588.17	25	978.725	70	913.58	913.241	909.969	0.365734	0.366328	0.372121
2014	1	4	6	1588.17	25	985.2	70	925.842	917.297	912.635	0.345073	0.359307	0.367392
2014	1	4	7	1588.17	25	984.9	70	918.044	913.75	910.891	0.358033	0.365436	0.370476
2014	1	4	8	1588.17	25	984.4	70	886.577	909.909	907.915	0.417274	0.372229	0.375819
2014	1	4	9	1588.17	25	983.7	70	890.634	906.438	908.235	0.408938	0.378508	0.37524
2014	1	4	10	1588.17	25	982	70	937.027	911.583	896.951	0.327503	0.369249	0.396398
2014	1	4	11	1588.17	25	980.5	70	876.937	910.386	889.841	0.438029	0.371376	0.410549
2014	1	4	12	1588.17	25	979.1	70	879.975	903.577	886.26	0.431339	0.383789	0.417935
2014	1	4	13	1588.17	25	978	70	890.224	900.657	887.274	0.409769	0.389278	0.415825
2014	1	4	14	1588.17	25	976.1	70	907.687	898.388	888.485	0.376233	0.393617	0.413324
2014	1	4	15	1588.17	25	975.3	70	838.639	888.462	888.733	0.536435	0.413371	0.412814
2014	1	4	16	1588.17	25	974.5	70	894.187	889.414	891.367	0.401821	0.411421	0.407454
2014	1	4	17	1588.17	25	972.6	70	922.834	893.439	890.251	0.349999	0.403305	0.409715
2014	1	4	18	1588.17	25	972.2	70	902.371	889.107	893.623	0.386044	0.412049	0.402938
2014	1	4	19	1588.17	25	971.3	70	893.504	891.178	901.586	0.403174	0.407837	0.38752
2014	1	4	20	1588.17	25	970.6	70	907.953	894.675	910.297	0.375749	0.400855	0.371534
2014	1	4	21	1588.17	25	970.2	70	895.531	895.338	916.987	0.399172	0.399549	0.359838
2014	1	4	22	1588.17	25	970.9	70	863.584	889.825	905.255	0.469202	0.41058	0.38068
2014	1	4	23	1588.17	25	971.8	70	975.738	906.963	899.727	0.274575	0.377549	0.391049
2014	1	5	0	1588.17	25	971.8	70	928.787	911.288	895.975	0.340335	0.369772	0.3983
2014	1	5	1	1588.17	25	971.6	70	882.316	906.223	890.901	0.426279	0.378901	0.408397
2014	1	5	2	1588.17	25	970.8	70	849.779	899.649	885.958	0.50481	0.391198	0.418565
2014	1	5	3	1588.17	25	969.5	70	849.997	894.211	888.938	0.504218	0.401773	0.412395
2014	1	5	4	1588.17	25	969.7	70	906.052	893.973	891.531	0.379214	0.402244	0.407125
2014	1	5	5	1588.17	25	969.6	70	886.199	892.806	889.105	0.418062	0.404565	0.412053
2014	1	5	6	1588.17	25	970.5	70	908.864	898.466	904.493	0.374104	0.393466	0.382088
2014	1	5	7	1588.17	25	971.7	70	927.846	892.48	916.413	0.341839	0.405218	0.360823
2014	1	5	8	1588.17	25	972.9	70	946.828	894.735	923.27	0.313014	0.400737	0.349281
2014	1	5	9	1588.17	25	974.9	70	917.674	899.155	926.094	0.358663	0.392143	0.344665
2014	1	5	10	1588.17	25	975.5	70	918.756	907.777	917.83	0.356825	0.376069	0.358398
2014	1	5	11	1588.17	25	976.1	70	919.837	916.507	916.722	0.354999	0.360661	0.360292
2014	1	5	12	1588.17	25	977.3	70	891.785	914.724	908.137	0.406614	0.363741	0.375417
2014	1	5	13	1588.17	25	978.3	70	907.912	917.438	910.638	0.375825	0.359067	0.370927
2014	1	5	14	1588.17	25	979.6	70	913.195	917.979	907.923	0.366409	0.358144	0.375805
2014	1	5	15	1588.17	25	980.6	70	881.2	912.148	908.366	0.428679	0.368249	0.375003
2014	1	5	16	1588.17	25	981.8	70	930.405	910.095	907.547	0.337766	0.371895	0.376486
2014	1	5	17	1588.17	25	982.7	70	908.056	908.893	903.37	0.375564	0.374052	0.384174
2014	1	5	18	1588.17	25	983.4	70	949.779	912.771	905.433	0.308807	0.367152	0.380353
2014	1	5	19	1588.17	25	983.6	70	857.242	904.947	903.423	0.485102	0.381248	0.384076
2014	1	5	20	1588.17	25	984	70	895.415	905.4	901.232	0.399399	0.380412	0.388189
2014	1	5	21	1588.17	25	984.1	70	898.155	904.181	901.629	0.394065	0.382666	0.38744
2014	1	5	22	1588.17	25	981.975	70	887.853	901.013	893.605	0.414627	0.388604	0.402974
2014	1	5	23	1588.17	25	982.125	70	929.571	907.059	893.934	0.339086	0.377373	0.402322
2014	1	6	0	1588.17	25	984.4	70	895.133	902.651	902.912	0.399953	0.385519	0.38503
2014	1	6	1	1588.17	25	984.8	70	896.246	901.174	915.622	0.397772	0.388299	0.362186
2014	1	6	2	1588.17	25	985.3	70	910.515	896.266	917.738	0.371145	0.397732	0.358554
2014	1	6	3	1588.17	25	985.4	70	900.596	901.685	916.395	0.389395	0.387333	0.360853
2014	1	6	4	1588.17	25	985.3	70	949.248	908.415	921.06	0.30956	0.374915	0.352948
2014	1	6	5	1588.17	25	985.5	70	964.331	916.687	921.191	0.289032	0.360353	0.35273
2014	1	6	6	1588.17	25	985.4	70	889.241	916.86	923.843	0.411773	0.360055	0.348338
2014	1	6	7	1588.17	25	985.8	70	906.149	913.932	918.171	0.379037	0.365119	0.357817
2014	1	6	8	1588.17	25	986.4	70	893.565	913.736	905.32	0.403053	0.365461	0.38056
2014	1	6	9	1588.17	25	986.5	70	942.599	919.53	897.646	0.319167	0.355515	0.395049
2014	1	6	10	1588.17	25	986.5	70	885.726	916.432	889.542	0.419051	0.36079	0.411158
2014	1	6	11	1588.17	25	985.9	70	875.723	913.323	891.424	0.440741	0.366184	0.40734
2014	1	6	12	1588.17	25	985.3	70	865.721	902.882	895.675	0.46401	0.385086	0.398889
2014	1	6	13	1588.17	25	985.3	70	879.628	892.294	894.435	0.432095	0.405591	0.401329
2014	1	6	14	1588.17	25	985.4	70	934.781	897.987	901.291	0.330939	0.394391	0.388078
2014	1	6	15	1588.17	25	985.5	70	917.488	899.404	905.227	0.358981	0.391666	0.380731
2014	1	6	16	1588.17	25	985.6	70	915.48	902.143	914.892	0.36243	0.386471	0.363448
2014	1	6	17	1588.17	25	985.3	70	889.052	895.45	914.026	0.41216	0.39933	0.364954
2014	1	6	18	1588.17	25	985.1	70	925.619	900.437	913.176	0.345436	0.389697	0.366441
2014	1	6	19	1588.17	25	985.2	70	935.678	907.931	897.711	0.329562	0.37579	0.394923
2014	1	6	20	1588.17	25	984.5	70	884.565	910.286	892.465	0.421493	0.371554	0.405249
2014	1	6	21	1588.17	25	984	70	875.795	909.807	896.679	0.44058	0.37241	0.396927
2014	1	6	22	1588.17	25	983.5	70	867.025	901.338	895.485	0.460879	0.387989	0.399262
2014	1	6	23	1588.17	25	983.1	70	899.888	899.138	902.805	0.390742	0.392176	0.385231
2014	1	7	0	1588.17	25	982.9	70	866.961	893.073	894.56	0.461033	0.404034	0.401082
2014	1	7	1	1588.17	25	983.3	70	975.09	903.828	895.679	0.275374	0.383322	0.398881
2014	1	7	2	1588.17	25	984.2	70	908.633	901.704	899.221	0.37452	0.387297	0.392017
2014	1	7	3	1588.17	25	985.6	70	874.642	894.075	897.413	0.443178	0.402042	0.395501
2014	1	7	4	1588.17	25	986.6	70	911.823	897.482	892.455	0.368824	0.395366	0.405268
2014	1	7	5	1588.17	25	987.3	70	825.898	891.245	886.829	0.576282	0.407701	0.416748
2014	1	7	6	1588.17	25	987.8	70	912.08	896.877	883.863	0.368369	0.396541	0.422979
2014	1	7	7	1588.17	25	988.3	70	878.081	894.151	882.032	0.435492	0.401891	0.426887
2014	1	7	8	1588.17	25	989.05	70	888.147	896.799	898.02	0.41402	0.396692	0.394326
2014	1	7	9	1588.17	25	989.8	70	898.213	887.19	906.739	0.393954	0.415999	0.377958
2014	1	7	10	1588.17	25	989.4	70	921.08	888.746	908.891	0.352915	0.412789	0.374057
2014	1	7	11	1588.17	25	988.9	70	920.106	894.429	915.703	0.354546	0.401342	0.362045
2014	1	7	12	1588.17	25	988.4	70	945.551	898.645	905.175	0.314857	0.393123	0.380827
2014	1	7	13	1588.17	25	988.65	70	907.853	908.889	903.344	0.375931	0.374059	0.384222
2014	1	7	14	1588.17	25	988.9	70	870.155	903.648	901.792	0.453489	0.383656	0.387132
2014	1	7	15	1588.17	25	989.05	70	879.986	903.887	895.843	0.431313	0.383213	0.398559
2014	1	7	16	1588.17	25	989.2	70	889.818	904.095	891.928	0.410596	0.382825	0.406325
2014	1	7	17	1588.17	25	988.9	70	877.658	901.526	895.133	0.436428	0.387634	0.399954
2014	1	7	18	1588.17	25	989.1	70	918.702	901.229	896.821	0.356917	0.388196	0.39665
2014	1	7	19	1588.17	25	988.9	70	926.845	902.071	908.39	0.34345	0.386607	0.374959
2014	1	7	20	1588.17	25	988.9	70	891.016	895.254	914.652	0.408164	0.399715	0.363865
2014	1	7	21	1588.17	25	988.8	70	927.219	897.675	913.434	0.342847	0.394993	0.36599
2014	1	7	22	1588.17	25	989.3	70	927.411	904.832	914.317	0.342537	0.38146	0.364448
2014	1	7	23	1588.17	25	989.3	70	896.24	906.864	913.516	0.397783	0.37773	0.365845
2014	1	8	0	1588.17	25	989.5	70	920	910.636	899.277	0.354725	0.37093	0.39191
2014	1	8	1	1588.17	25	989.6	70	880.206	910.955	896.17	0.430835	0.370363	0.397919
2014	1	8	2	1588.17	25	989.5	70	895.003	907.992	902.473	0.400209	0.375679	0.385851
2014	1	8	3	1588.17	25	989.3	70	913.332	906.303	900.33	0.366168	0.378754	0.389899
2014	1	8	4	1588.17	25	989.5	70	880.044	904.932	902.321	0.431187	0.381276	0.386138
2014	1	8	5	1588.17	25	990.4	70	868.237	897.559	900.785	0.457999	0.395217	0.389036
2014	1	8	6	1588.17	25	991.4	70	962.863	901.991	899.799	0.290957	0.386758	0.390911
2014	1	8	7	1588.17	25	991.9	70	936.091	906.972	906.717	0.32893	0.377533	0.377999
2014	1	8	8	1588.17	25	991.8	70	873.648	901.178	909.246	0.445433	0.388292	0.373416
2014	1	8	9	1588.17	25	991.7	70	892.895	902.764	912.925	0.404388	0.385306	0.366881
2014	1	8	10	1588.17	25	991.2	70	885.829	901.617	916.815	0.418835	0.387462	0.360131
2014	1	8	11	1588.17	25	990.6	70	941.73	905.167	912.551	0.32045	0.380842	0.367539
2014	1	8	12	1588.17	25	990.5	70	939.891	912.648	909.611	0.323185	0.367369	0.372762
2014	1	8	13	1588.17	25	990.4	70	915.371	918.54	917.025	0.362618	0.357191	0.359772
2014	1	8	14	1588.17	25	990.4	70	911.91	912.171	920.021	0.368671	0.36821	0.354689
2014	1	8	15	1588.17	25	990.4	70	898.693	907.496	915.019	0.393029	0.376579	0.363228
2014	1	8	16	1588.17	25	990.4	70	906.573	911.612	911.916	0.378262	0.369198	0.368659
2014	1	8	17	1588.17	25	990.3	70	942.787	917.848	912.374	0.31889	0.358367	0.367851
2014	1	8	18	1588.17	25	990.5	70	894.703	918.957	910.224	0.4008	0.356483	0.371664
2014	1	8	19	1588.17	25	990.5	70	885.852	911.973	914.376	0.418788	0.368559	0.364346
2014	1	8	20	1588.17	25	990.6	70	919.536	909.428	910.215	0.355506	0.37309	0.371681
2014	1	8	21	1588.17	25	990.2	70	933.123	911.647	905.397	0.333504	0.369135	0.380418
2014	1	8	22	1588.17	25	990	70	927.725	913.624	899.959	0.342034	0.365657	0.390606
2014	1	8	23	1588.17	25	989.1	70	853.349	907.956	887.742	0.495243	0.375745	0.414856
2014	1	9	0	1588.17	25	988.6	70	906.189	907.908	895.119	0.378964	0.375832	0.399981
2014	1	9	1	1588.17	25	988.4	70	852.226	896.588	886.263	0.498223	0.397104	0.417928
2014	1	9	2	1588.17	25	988	70	888.73	895.841	880.915	0.41282	0.398563	0.429297
2014	1	9	3	1588.17	25	987.3	70	890.682	896.445	879.915	0.40884	0.397383	0.43147
2014	1	9	4	1588.17	25	986.7	70	872.943	890.621	885.502	0.447043	0.408964	0.419521
2014	1	9	5	1588.17	25	986.2	70	949.387	892.654	899.362	0.309362	0.404871	0.391747
2014	1	9	6	1588.17	25	985.9	70	836.689	881.274	903.202	0.542267	0.42852	0.384487
2014	1	9	7	1588.17	25	985.9	70	934.698	891.443	911.656	0.331067	0.407302	0.369119
2014	1	9	8	1588.17	25	985.6	70	913.416	892.346	914.176	0.366021	0.405486	0.364693
2014	1	9	9	1588.17	25	985.3	70	933.4	902.493	920.942	0.333075	0.385814	0.353144
2014	1	9	10	1588.17	25	984.9	70	941.325	909.067	928.678	0.32105	0.373738	0.340508
2014	1	9	11	1588.17	25	984.2	70	909.836	911.462	932.841	0.372359	0.369463	0.333944
2014	1	9	12	1588.17	25	983.1	70	925.327	918.01	940.235	0.34591	0.358091	0.322672
2014	1	9	13	1588.17	25	982.8	70	945.468	917.52	933.677	0.314977	0.358926	0.332645
2014	1	9	14	1588.17	25	982.6	70	948.801	931.534	934.899	0.310193	0.335988	0.330758
2014	1	9	15	1588.17	25	982.3	70	939.789	932.17	926.141	0.323338	0.334991	0.344587
2014	1	9	16	1588.17	25	981.7	70	921.195	933.143	919.72	0.352723	0.333475	0.355195
2014	1	9	17	1588.17	25	980.8	70	893.465	928.151	921.698	0.403253	0.341351	0.351885
2014	1	9	18	1588.17	25	980.3	70	925.319	926.15	913.442	0.345923	0.344573	0.365975
2014	1	9	19	1588.17	25	980.4	70	900.226	924.949	905.342	0.390098	0.346527	0.380519
2014	1	9	20	1588.17	25	979.5	70	877.966	919.029	897.608	0.435746	0.356363	0.395124
2014	1	9	21	1588.17	25	978.9	70	926.135	916.612	900.107	0.344598	0.36048	0.390324
2014	1	9	22	1588.17	25	978.8	70	933.696	914.724	908.236	0.332615	0.36374	0.375237
2014	1	9	23	1588.17	25	978.5	70	868.638	905.83	916.678	0.457051	0.379622	0.360366
2014	1	10	0	1588.17	25	978.5	70	905.486	903.866	919.707	0.380255	0.38325	0.355217
2014	1	10	1	1588.17	25	979.2	70	916.921	906.798	920.304	0.359951	0.377849	0.354214
2014	1	10	2	1588.17	25	980.7	70	969.111	912.272	921.254	0.282868	0.36803	0.352623
2014	1	10	3	1588.17	25	982.5	70	937.526	916.935	918.635	0.326746	0.359927	0.357029
2014	1	10	4	1588.17	25	983.4	70	907.52	920.629	914.981	0.376535	0.353669	0.363294
2014	1	10	5	1588.17	25	984.1	70	885.487	915.548	909.681	0.419552	0.362313	0.372637
2014	1	10	6	1588.17	25	984.2	70	876.436	908.391	896.766	0.439146	0.374958	0.396758
2014	1	10	7	1588.17	25	985.3	70	918.263	914.594	883.655	0.35766	0.363967	0.42342
2014	1	10	8	1588.17	25	985.9	70	887.982	912.406	879.967	0.414361	0.367795	0.431356
2014	1	10	9	1588.17	25	986.8	70	851.676	904.25	884.459	0.499695	0.382537	0.421717
2014	1	10	10	1588.17	25	986.9	70	871.633	892.065	888.797	0.450056	0.40605	0.412684
2014	1	10	11	1588.17	25	986.4	70	901.382	887.547	894.803	0.387906	0.415258	0.400604
2014	1	10	12	1588.17	25	986.1	70	900.231	886.636	893.841	0.390089	0.41715	0.402505
2014	1	10	13	1588.17	25	986.3	70	940.984	893.573	895.709	0.321555	0.403037	0.398822
2014	1	10	14	1588.17	25	986.7	70	886.516	894.833	899.957	0.417399	0.400543	0.390611
2014	1	10	15	1588.17	25	986.8	70	891.79	891.524	908.559	0.406603	0.407138	0.374654
2014	1	10	16	1588.17	25	987.2	70	904.592	893.6	903.748	0.381905	0.402983	0.38347
2014	1	10	17	1588.17	25	987.4	70	880.95	897.26	905.768	0.42922	0.395798	0.379736
2014	1	10	18	1588.17	25	987.7	70	928.384	904.354	905.985	0.340978	0.382345	0.379338
2014	1	10	19	1588.17	25	987.7	70	899.01	904.057	903.975	0.39242	0.382895	0.383049
2014	1	10	20	1588.17	25	987.9	70	936.966	908.649	907.928	0.327596	0.374492	0.375796
2014	1	10	21	1588.17	25	988	70	882.816	901.378	912.328	0.425208	0.387913	0.367932
2014	1	10	22	1588.17	25	987.7	70	947.656	909.02	924.596	0.311827	0.373823	0.347103
2014	1	10	23	1588.17	25	987.5	70	888.352	908.591	926.178	0.413598	0.374597	0.344528
2014	1	11	0	1588.17	25	987.5	70	913.115	909.656	923.129	0.366548	0.372681	0.349512
2014	1	11	1	1588.17	25	987.7	70	938.253	916.819	924.9	0.325646	0.360125	0.346607
2014	1	11	2	1588.17	25	987.2	70	969.785	921.994	920.952	0.282011	0.351392	0.353128
2014	1	11	3	1588.17	25	987.2	70	945.465	927.801	921.862	0.314982	0.341912	0.351612
2014	1	11	4	1588.17	25	987.1	70	851.19	917.079	912.836	0.500997	0.35968	0.367038
2014	1	11	5	1588.17	25	986.9	70	916.738	921.319	917.751	0.360265	0.352515	0.358531
2014	1	11	6	1588.17	25	986.9	70	914.439	917.167	918.562	0.364235	0.359529	0.357153
2014	1	11	7	1588.17	25	986.9	70	907.621	919.576	919.277	0.376352	0.355439	0.355943
2014	1	11	8	1588.17	25	986.8	70	921.979	920.684	920.947	0.351417	0.353577	0.353136
2014	1	11	9	1588.17	25	986.6	70	923.843	918.882	921.961	0.348338	0.35661	0.351446
2014	1	11	10	1588.17	25	986.1	70	966.485	918.47	923.309	0.286235	0.357309	0.349216
2014	1	11	11	1588.17	25	985.45	70	929.555	916.481	913.113	0.339112	0.360705	0.366552
2014	1	11	12	1588.17	25	984.8	70	892.624	921.661	904.406	0.404929	0.351947	0.382248
2014	1	11	13	1588.17	25	984.7	70	872.49	916.13	892.907	0.448083	0.36131	0.404364
2014	1	11	14	1588.17	25	984.6	70	852.355	908.369	880.608	0.49788	0.374998	0.429962
2014	1	11	15	1588.17	25	984.7	70	888.671	906	874.896	0.412943	0.37931	0.442603
2014	1	11	16	1588.17	25	984.9	70	885.183	901.401	871.587	0.420191	0.387871	0.450164
2014	1	11	17	1588.17	25	984.7	70	861.56	893.615	882.166	0.474194	0.402954	0.426601
2014	1	11	18	1588.17	25	985	70	876.006	882.305	885.01	0.440108	0.426301	0.420554
2014	1	11	19	1588.17	25	986	70	900.02	878.614	882.481	0.39049	0.434319	0.425925
2014	1	11	20	1588.17	25	985.9	70	916.564	881.606	885.586	0.360563	0.427804	0.419344
2014	1	11	21	1588.17	25	986.1	70	893.14	884.187	887.247	0.4039	0.422291	0.415881
2014	1	11	22	1588.17	25	986.5	70	891.394	889.067	896.773	0.4074	0.41213	0.396745
2014	1	11	23	1588.17	25	987.1	70	835.329	882.4	899.138	0.546388	0.426099	0.392175
2014	1	12	0	1588.17	25	987.9	70	894.743	883.595	902.266	0.40072	0.423548	0.386241
2014	1	12	1	1588.17	25	988.5	70	956.364	895.445	908.525	0.299664	0.39934	0.374716
2014	1	12	2	1588.17	25	988.7	70	929.108	902.083	913.209	0.339823	0.386585	0.366383
2014	1	12	3	1588.17	25	988.9	70	927.586	905.529	924	0.342257	0.380176	0.34808
2014	1	12	4	1588.17	25	989.5	70	888.931	902.074	931.021	0.412408	0.386601	0.336794
2014	1	12	5	1588.17	25	990.3	70	955.944	909.925	935.921	0.300236	0.3722	0.32919
2014	1	12	6	1588.17	25	991.3	70	938.25	915.782	926.617	0.32565	0.361909	0.343818
2014	1	12	7	1588.17	25	991.7	70	910.04	925.121	924.453	0.371995	0.346246	0.347338
2014	1	12	8	1588.17	25	992.3	70	941.429	930.956	924.05	0.320896	0.336895	0.347998
2014	1	12	9	1588.17	25	992.6	70	914.613	925.738	924.072	0.363933	0.345242	0.347961
2014	1	12	10	1588.17	25	992.1	70	917.204	924.25	927.503	0.359466	0.34767	0.342389
2014	1	12	11	1588.17	25	991.6	70	916.656	922.884	925.79	0.360404	0.349918	0.345158
2014	1	12	12	1588.17	25	991.1	70	947.37	930.188	923.558	0.312237	0.338108	0.348806
2014	1	12	13	1588.17	25	990.8	70	902.239	923.475	925.831	0.386291	0.348942	0.345091
2014	1	12	14	1588.17	25	990.4	70	947.356	924.613	926.386	0.312256	0.347075	0.344192
2014	1	12	15	1588.17	25	989.9	70	943.72	928.823	934.138	0.317522	0.340276	0.331931
2014	1	12	16	1588.17	25	989.65	70	918.277	925.929	932.214	0.357637	0.344931	0.334922
2014	1	12	17	1588.17	25	989.4	70	892.834	923.207	924.748	0.404511	0.349384	0.346854
2014	1	12	18	1588.17	25	989.8	70	961.333	928.723	920.718	0.292978	0.340436	0.353519
2014	1	12	19	1588.17	25	989.5	70	938.886	931.502	927.186	0.324693	0.336038	0.342899
2014	1	12	20	1588.17	25	989.1	70	926.845	928.936	928.699	0.34345	0.340096	0.340474
2014	1	12	21	1588.17	25	988.6	70	878.303	925.944	926.392	0.435003	0.344907	0.344182
2014	1	12	22	1588.17	25	988.5	70	913.337	921.692	926.75	0.366159	0.351895	0.343603
2014	1	12	23	1588.17	25	987.9	70	968.731	924.818	922.559	0.283353	0.34674	0.350454
2014	1	13	0	1588.17	25	987.3	70	959.723	929.999	919.245	0.295124	0.338408	0.355998
2014	1	13	1	1588.17	25	986.8	70	907.989	931.893	929.807	0.375685	0.335424	0.338712
2014	1	13	2	1588.17	25	986.1	70	873.988	920.975	926.133	0.444662	0.35309	0.344601
2014	1	13	3	1588.17	25	985.6	70	933.748	920.333	930.178	0.332535	0.354165	0.338124
2014	1	13	4	1588.17	25	985.3	70	929.251	920.634	923.504	0.339596	0.353661	0.348895
2014	1	13	5	1588.17	25	985.3	70	963.973	931.342	916.727	0.2895	0.336288	0.360283
2014	1	13	6	1588.17	25	985.8	70	930.836	933.53	920.298	0.337085	0.332873	0.354224
2014	1	13	7	1588.17	25	985.7	70	857.512	919.627	927.797	0.484409	0.355352	0.341917
2014	1	13	8	1588.17	25	985.6	70	964.394	920.211	921.039	0.28895	0.35437	0.352983
2014	1	13	9	1588.17	25	984.9	70	903.723	919.678	919.687	0.383516	0.355266	0.355251
2014	1	13	10	1588.17	25	984.25	70	921.379	925.602	923.337	0.352415	0.345463	0.349171
2014	1	13	11	1588.17	25	983.6	70	939.036	926.263	934.824	0.324467	0.34439	0.330874
2014	1	13	12	1588.17	25	982.7	70	922.853	925.463	937.565	0.349969	0.345688	0.326687
2014	1	13	13	1588.17	25	982.1	70	904.287	918.003	936.101	0.382469	0.358104	0.328914
2014	1	13	14	1588.17	25	982.1	70	1006.42	927.451	923.876	0.239626	0.342474	0.348284
2014	1	13	15	1588.17	25	981.8	70	933.273	936.921	921.659	0.333272	0.327664	0.351948
2014	1	13	16	1588.17	25	981.7	70	932.556	932.941	916.384	0.334389	0.333788	0.360872
2014	1	13	17	1588.17	25	981.6	70	824.758	923.071	915.744	0.580059	0.349609	0.361975
2014	1	13	18	1588.17	25	981.3	70	904.409	920.949	915.542	0.382243	0.353133	0.362323
2014	1	13	19	1588.17	25	982.9	70	922.956	918.939	913.65	0.349798	0.356514	0.365611
2014	1	13	20	1588.17	25	982.9	70	923.261	918.99	906.722	0.349295	0.356427	0.377988
2014	1	13	21	1588.17	25	979.2	70	948.467	924.513	915.559	0.310669	0.347239	0.362293
2014	1	13	22	1588.17	25	979.7	70	936.994	915.834	926.145	0.327553	0.361819	0.344581
2014	1	13	23	1588.17	25	982.85	70	905.081	912.31	934.245	0.381	0.367964	0.331767
2014	1	14	0	1588.17	25	983.025	70	913.834	909.97	923.669	0.365289	0.372119	0.348623
2014	1	14	1	1588.17	25	978.9	70	912.232	920.904	916.584	0.368102	0.353208	0.360529
2014	1	14	2	1588.17	25	978.1	70	929.829	924.082	910.64	0.338677	0.347945	0.370922
2014	1	14	3	1588.17	25	977.2	70	934.578	925.535	907.894	0.331252	0.345573	0.375858
2014	1	14	4	1588.17	25	976.8	70	878.476	919.936	906.799	0.434623	0.354832	0.377848
2014	1	14	5	1588.17	25	976.25	70	892.683	912.963	912.535	0.404813	0.366815	0.367567
2014	1	14	6	1588.17	25	975.7	70	906.89	909.2	905.416	0.377682	0.373499	0.380382
2014	1	14	7	1588.17	25	975.1	70	916.4	910.615	906.888	0.360845	0.370967	0.377686
2014	1	14	8	1588.17	25	974.6	70	926.309	912.175	910.079	0.344316	0.368203	0.371924
2014	1	14	9	1588.17	25	974.3	70	902.724	910.986	910.905	0.385382	0.370307	0.370452
2014	1	14	10	1588.17	25	973.2	70	929.77	910.979	924.305	0.33877	0.370321	0.34758
2014	1	14	11	1588.17	25	972.4	70	874.615	903.483	919.264	0.443239	0.383963	0.355965
2014	1	14	12	1588.17	25	971.5	70	963.383	914.097	916.624	0.290273	0.364832	0.36046
2014	1	14	13	1588.17	25	971.4	70	918.678	917.346	913.243	0.356956	0.359223	0.366323
2014	1	14	14	1588.17	25	971.6	70	897.33	916.151	910.557	0.395662	0.361273	0.371071
2014	1	14	15	1588.17	25	972.1	70	946.563	919.922	911.842	0.313396	0.354857	0.368789
2014	1	14	16	1588.17	25	972.9	70	849.483	910.318	911.362	0.505616	0.371497	0.369639
2014	1	14	17	1588.17	25	973.6	70	929.192	913.627	917.191	0.339689	0.365652	0.359488
2014	1	14	18	1588.17	25	974.2	70	910.04	911.16	915.386	0.371993	0.369998	0.362593
2014	1	14	19	1588.17	25	974.9	70	922.716	917.173	916.099	0.350194	0.359519	0.361362
2014	1	14	20	1588.17	25	975.6	70	935.392	913.674	918.092	0.329999	0.365569	0.357951
2014	1	14	21	1588.17	25	976	70	929.106	914.978	914.12	0.339826	0.3633	0.364791
2014	1	14	22	1588.17	25	976.4	70	928.087	918.822	923.459	0.341453	0.356712	0.348969
2014	1	14	23	1588.17	25	976.7	70	898.887	912.863	913.841	0.392657	0.366991	0.365278
2014	1	15	0	1588.17	25	977	70	874.659	916.01	917.551	0.44314	0.361516	0.358873
2014	1	15	1	1588.17	25	977.6	70	938.646	917.192	917.87	0.325053	0.359487	0.358329
2014	1	15	2	1588.17	25	977.6	70	912.543	917.504	917.626	0.367554	0.358953	0.358745
2014	1	15	3	1588.17	25	978	70	949.016	920.792	919.695	0.309888	0.353396	0.355237
2014	1	15	4	1588.17	25	978.4	70	897.383	916.041	922.074	0.395559	0.361463	0.351259
2014	1	15	5	1588.17	25	978.8	70	952.098	918.915	915.106	0.305548	0.356555	0.363078
2014	1	15	6	1588.17	25	979.4	70	904.103	915.917	911.148	0.382811	0.361676	0.37002
2014	1	15	7	1588.17	25	980	70	899.814	916.033	907.098	0.390882	0.361477	0.377303
2014	1	15	8	1588.17	25	980.2	70	902.36	919.495	912.225	0.386063	0.355574	0.368114
2014	1	15	9	1588.17	25	980.6	70	889.195	913.314	909.277	0.411868	0.366199	0.373361
2014	1	15	10	1588.17	25	980.3	70	868.533	907.813	905	0.457299	0.376004	0.38115
2014	1	15	11	1588.17	25	980.3	70	964.066	909.694	901.72	0.289378	0.372613	0.387268
2014	1	15	12	1588.17	25	980.7	70	942.613	915.348	909.28	0.319146	0.362659	0.373355
2014	1	15	13	1588.17	25	980.8	70	904.539	909.403	906.506	0.382003	0.373135	0.378383
2014	1	15	14	1588.17	25	980.8	70	859.369	903.811	906.385	0.479687	0.383353	0.378605
2014	1	15	15	1588.17	25	981	70	878.562	901.155	909.269	0.434433	0.388336	0.373377
2014	1	15	16	1588.17	25	981.1	70	944.614	906.436	906.274	0.316217	0.378511	0.378809
2014	1	15	17	1588.17	25	981.2	70	910.145	909.055	896.404	0.371807	0.373761	0.397463
2014	1	15	18	1588.17	25	981.3	70	875.675	909.948	898.885	0.44085	0.372159	0.392662
2014	1	15	19	1588.17	25	981.2	70	930.203	905.715	904.942	0.338084	0.379833	0.381258
2014	1	15	20	1588.17	25	981	70	914.243	902.169	908.94	0.364577	0.386424	0.373967
2014	1	15	21	1588.17	25	980.7	70	882.042	899.356	910.276	0.426867	0.391757	0.371572
2014	1	15	22	1588.17	25	980.2	70	899.71	904.399	913.555	0.391082	0.382261	0.365777
2014	1	15	23	1588.17	25	979.7	70	917.378	909.251	911.991	0.359169	0.373408	0.368527
2014	1	16	0	1588.17	25	979.9	70	926.213	906.951	914.897	0.344472	0.377571	0.36344
2014	1	16	1	1588.17	25	977.25	70	924.097	908.695	909.731	0.347921	0.374409	0.372547
2014	1	16	2	1588.17	25	977.025	70	934.482	916.046	904.984	0.331401	0.361454	0.381179
2014	1	16	3	1588.17	25	979.2	70	899.076	912.155	904.504	0.392295	0.368238	0.382067
2014	1	16	4	1588.17	25	979	70	841.763	903.095	902.729	0.527285	0.384688	0.385372
2014	1	16	5	1588.17	25	978.7	70	936.573	909.911	902.79	0.328193	0.372224	0.385258
2014	1	16	6	1588.17	25	978.4	70	882.544	907.766	908.921	0.42579	0.37609	0.374002
2014	1	16	7	1588.17	25	978.3	70	891.996	904.593	911.008	0.406189	0.381903	0.370268
2014	1	16	8	1588.17	25	978.5	70	952.706	907.904	917.875	0.304702	0.375838	0.358321
2014	1	16	9	1588.17	25	978	70	941.709	910.106	919.491	0.320481	0.371876	0.355581
2014	1	16	10	1588.17	25	977.5	70	930.712	909.635	924.963	0.337281	0.37272	0.346504
2014	1	16	11	1588.17	25	976.6	70	927.94	913.243	921.705	0.341688	0.366324	0.351872
2014	1	16	12	1588.17	25	975.7	70	882.581	918.345	926.08	0.42571	0.357521	0.344687
2014	1	16	13	1588.17	25	975.4	70	923.031	916.652	918.261	0.349675	0.360411	0.357663
2014	1	16	14	1588.17	25	975.6	70	883.713	916.799	909.027	0.423296	0.36016	0.373811
2014	1	16	15	1588.17	25	975.2	70	960.433	925.353	906.647	0.294176	0.345868	0.378125
2014	1	16	16	1588.17	25	975.2	70	917.094	920.902	908.849	0.359654	0.353213	0.374131
2014	1	16	17	1588.17	25	974.9	70	893.223	914.841	908.949	0.403735	0.363537	0.373952
2014	1	16	18	1588.17	25	974.5	70	883.254	908.909	912.58	0.424274	0.374024	0.367489
2014	1	16	19	1588.17	25	973.8	70	916.238	907.446	911.517	0.361123	0.37667	0.369365
2014	1	16	20	1588.17	25	973.6	70	916.623	911.701	908.975	0.360461	0.369039	0.373905
2014	1	16	21	1588.17	25	973.5	70	928.465	912.38	909.191	0.340848	0.36784	0.373516
2014	1	16	22	1588.17	25	973.4	70	903.572	914.863	919.895	0.383797	0.363499	0.354901
2014	1	16	23	1588.17	25	973.6	70	930.076	911.068	927.636	0.338285	0.370162	0.342176
2014	1	17	0	1588.17	25	974.5	70	919.736	911.398	929.263	0.355168	0.369575	0.339575
2014	1	17	1	1588.17	25	975.4	70	909.396	913.42	926.547	0.373147	0.366014	0.343932
2014	1	17	2	1588.17	25	975.5	70	973.803	924.739	928.705	0.276967	0.34687	0.340465
2014	1	17	3	1588.17	25	975.5	70	923.748	925.678	924.418	0.348494	0.34534	0.347394
2014	1	17	4	1588.17	25	975.4	70	913.496	925.287	920.852	0.36588	0.345976	0.353296
2014	1	17	5	1588.17	25	975.3	70	903.245	922.134	912.375	0.384408	0.351159	0.36785
2014	1	17	6	1588.17	25	975.5	70	915.605	923.638	910.478	0.362215	0.348674	0.371211
2014	1	17	7	1588.17	25	975.8	70	917.624	922.082	911.163	0.358749	0.351246	0.369993
2014	1	17	8	1588.17	25	975.8	70	877.86	916.847	908.793	0.43598	0.360077	0.374232
2014	1	17	9	1588.17	25	976.15	70	913.106	917.311	917.822	0.366564	0.359283	0.358412
2014	1	17	10	1588.17	25	975.6	70	922.945	910.954	924.863	0.349817	0.370365	0.346667
2014	1	17	11	1588.17	25	974	70	952.458	914.542	928.412	0.305048	0.364056	0.340933
2014	1	17	12	1588.17	25	973.6	70	941.304	918.018	922.246	0.321081	0.358077	0.350974
2014	1	17	13	1588.17	25	973.4	70	917.848	919.844	922.608	0.358367	0.354988	0.350374
2014	1	17	14	1588.17	25	973.6	70	928.072	921.402	924.828	0.341477	0.352377	0.346723
2014	1	17	15	1588.17	25	973.8	70	909.942	920.442	917.191	0.372169	0.353983	0.359489
2014	1	17	16	1588.17	25	973.8	70	882.401	921.009	906.347	0.426096	0.353033	0.378674
2014	1	17	17	1588.17	25	975	70	877.075	916.506	895.592	0.437721	0.360663	0.399051
2014	1	17	18	1588.17	25	976.5	70	940.876	918.747	889.581	0.321717	0.35684	0.411079
2014	1	17	19	1588.17	25	977.2	70	899.27	912.098	884.257	0.391922	0.368337	0.422143
2014	1	17	20	1588.17	25	976.8	70	864.23	902.464	883.131	0.467623	0.385868	0.424536
2014	1	17	21	1588.17	25	976.2	70	861.024	895.361	888.613	0.47553	0.399504	0.413062
2014	1	17	22	1588.17	25	976	70	887.273	890.262	893.368	0.415826	0.409693	0.403445
2014	1	17	23	1588.17	25	976.4	70	892.633	888.098	900.085	0.404912	0.414121	0.390367
2014	1	18	0	1588.17	25	976.7	70	903.872	890.782	898.126	0.38324	0.408638	0.394122
2014	1	18	1	1588.17	25	977.1	70	936.112	898.161	902.067	0.328897	0.394053	0.386614
2014	1	18	2	1588.17	25	976.9	70	921.752	895.771	909.787	0.351794	0.3987	0.372446
2014	1	18	3	1588.17	25	977	70	904.121	896.377	911.166	0.382778	0.397515	0.369987
2014	1	18	4	1588.17	25	976.4	70	915.588	902.797	908.999	0.362243	0.385245	0.373861
2014	1	18	5	1588.17	25	976.5	70	862.679	903.004	910.175	0.471427	0.384858	0.371752
2014	1	18	6	1588.17	25	976.5	70	905.028	905.223	914.2	0.381098	0.380738	0.364651
2014	1	18	7	1588.17	25	976.5	70	947.377	912.066	919.097	0.312226	0.368394	0.356247
2014	1	18	8	1588.17	25	976.1	70	911.603	913.032	920.323	0.369213	0.366693	0.354182
2014	1	18	9	1588.17	25	976.1	70	928.021	912.021	922.053	0.341559	0.368474	0.351293
2014	1	18	10	1588.17	25	975.3	70	943.951	914.796	918.332	0.317184	0.363615	0.357544
2014	1	18	11	1588.17	25	974.5	70	934.548	918.599	915.747	0.331298	0.35709	0.361969
2014	1	18	12	1588.17	25	973.9	70	897.312	916.315	910.497	0.395696	0.360991	0.371178
2014	1	18	13	1588.17	25	973.3	70	860.076	915.99	901.432	0.477905	0.361551	0.387811
2014	1	18	14	1588.17	25	972.7	70	904.95	915.98	904.065	0.381243	0.361568	0.382881
2014	1	18	15	1588.17	25	972.7	70	890.685	908.893	901.866	0.408835	0.374052	0.386993
2014	1	18	16	1588.17	25	972.6	70	918.526	909.759	898.629	0.357215	0.372498	0.393152
2014	1	18	17	1588.17	25	972.6	70	933.653	910.463	905.015	0.332682	0.371239	0.381122
2014	1	18	18	1588.17	25	972.4	70	885.887	903.205	911.766	0.418713	0.384483	0.368925
2014	1	18	19	1588.17	25	972.4	70	937.707	903.599	913.929	0.326471	0.383747	0.365125
2014	1	18	20	1588.17	25	972.2	70	893.224	903.088	918.363	0.403732	0.3847	0.35749
2014	1	18	21	1588.17	25	971.8	70	900.481	908.139	917.995	0.389614	0.375413	0.358117
2014	1	18	22	1588.17	25	971.7	70	940.611	912.597	912.574	0.322111	0.367459	0.3675
2014	1	18	23	1588.17	25	971.4	70	905.645	914.467	909.432	0.379962	0.364187	0.373083
2014	1	19	0	1588.17	25	971.2	70	920.21	914.677	916.256	0.354372	0.363821	0.361092
2014	1	19	1	1588.17	25	971	70	947.156	916.365	912.641	0.312544	0.360905	0.36738
2014	1	19	2	1588.17	25	970.5	70	863.686	913.59	916.886	0.468952	0.365717	0.360011
2014	1	19	3	1588.17	25	970.1	70	908.049	909.883	922.129	0.375576	0.372275	0.351167
2014	1	19	4	1588.17	25	969.8	70	931.506	914.668	919.424	0.336031	0.363838	0.355695
2014	1	19	5	1588.17	25	969.5	70	954.964	921.478	924.348	0.30158	0.35225	0.34751
2014	1	19	6	1588.17	25	969.5	70	904.762	916.997	928.925	0.381589	0.35982	0.340114
2014	1	19	7	1588.17	25	969.8	70	946.395	922.091	933.909	0.313638	0.351231	0.332286
2014	1	19	8	1588.17	25	969.8	70	949.188	925.713	940.791	0.309644	0.345282	0.321843
2014	1	19	9	1588.17	25	969.9	70	893.5	919.006	929.216	0.403184	0.356401	0.339651
2014	1	19	10	1588.17	25	969.3	70	948.583	929.618	920.324	0.310503	0.339011	0.35418
2014	1	19	11	1588.17	25	968.9	70	937.812	933.339	911.013	0.326313	0.33317	0.37026
2014	1	19	12	1588.17	25	968.5	70	902.077	929.66	907.213	0.386596	0.338945	0.377094
2014	1	19	13	1588.17	25	968.3	70	881.718	920.504	903.596	0.427562	0.353878	0.383754
2014	1	19	14	1588.17	25	968.6	70	869.13	916.05	902.563	0.455891	0.361446	0.385684
2014	1	19	15	1588.17	25	968	70	911.409	911.677	901.958	0.369556	0.369082	0.38682
2014	1	19	16	1588.17	25	967.4	70	900.414	905.581	894.879	0.389739	0.38008	0.400453
2014	1	19	17	1588.17	25	967.4	70	924.964	909.514	898.606	0.346502	0.372937	0.393197
2014	1	19	18	1588.17	25	967.2	70	930.339	907.233	909.793	0.337869	0.377057	0.372436
2014	1	19	19	1588.17	25	967.2	70	882.836	900.361	913.12	0.425166	0.389841	0.36654
2014	1	19	20	1588.17	25	967.2	70	892.984	899.224	914.259	0.404211	0.39201	0.364549
2014	1	19	21	1588.17	25	967	70	917.331	903.676	919.901	0.359248	0.383604	0.354891
2014	1	19	22	1588.17	25	966.8	70	941.679	912.745	922.139	0.320526	0.367199	0.351151
2014	1	19	23	1588.17	25	966.9	70	937.272	915.977	923.391	0.327131	0.361572	0.349082
2014	1	20	0	1588.17	25	966.3	70	894.628	915.254	923.486	0.400948	0.362821	0.348924
2014	1	20	1	1588.17	25	966.3	70	941.401	917.309	928.535	0.320938	0.359287	0.340736
2014	1	20	2	1588.17	25	965.8	70	953.882	920.252	917.894	0.30307	0.354302	0.358288
2014	1	20	3	1588.17	25	965.5	70	873.894	919.134	901.646	0.444874	0.356185	0.387408
2014	1	20	4	1588.17	25	965.4	70	906.15	920.78	894.805	0.379035	0.353417	0.400599
2014	1	20	5	1588.17	25	965.5	70	879.773	916.085	889.457	0.431778	0.361387	0.411332
2014	1	20	6	1588.17	25	965.8	70	892.743	909.968	887.301	0.404691	0.372123	0.415768
2014	1	20	7	1588.17	25	966.2	70	834.661	897.142	881.286	0.54843	0.396027	0.428494
2014	1	20	8	1588.17	25	966.5	70	884.664	895.896	878.894	0.421284	0.398455	0.433703
2014	1	20	9	1588.17	25	967	70	932.012	894.722	881.939	0.335239	0.400762	0.427088
2014	1	20	10	1588.17	25	967.6	70	875.994	884.986	882.535	0.440134	0.420604	0.425808
2014	1	20	11	1588.17	25	967.5	70	892.955	887.369	890.497	0.404268	0.415628	0.409214
2014	1	20	12	1588.17	25	968.1	70	882.769	884.446	898.733	0.425309	0.421743	0.392952
2014	1	20	13	1588.17	25	969	70	873.491	883.661	904.755	0.445792	0.423407	0.381602
2014	1	20	14	1588.17	25	969.4	70	904.513	885.132	899.804	0.38205	0.420297	0.390902
2014	1	20	15	1588.17	25	969.8	70	935.773	897.771	898.918	0.329416	0.394807	0.392597
2014	1	20	16	1588.17	25	970.4	70	922.789	902.537	907.795	0.350074	0.385732	0.376036
2014	1	20	17	1588.17	25	970.8	70	908.351	899.579	914.187	0.375029	0.391331	0.364674
2014	1	20	18	1588.17	25	971.2	70	878.833	899.934	911.454	0.433837	0.390653	0.369477
2014	1	20	19	1588.17	25	971.6	70	901.621	901.018	913.943	0.387454	0.388595	0.3651
2014	1	20	20	1588.17	25	971.9	70	923.904	906.159	910.055	0.348238	0.379018	0.371967
2014	1	20	21	1588.17	25	972.2	70	927.969	912.969	901.063	0.341642	0.366804	0.388508
2014	1	20	22	1588.17	25	972.4	70	908.199	913.43	894.174	0.375304	0.365996	0.401846
2014	1	20	23	1588.17	25	972.5	70	859.048	903.839	897.288	0.480497	0.3833	0.395744
2014	1	21	0	1588.17	25	972.7	70	934.237	905.27	897.962	0.331779	0.380651	0.394439
2014	1	21	1	1588.17	25	973	70	865.086	899.862	893.845	0.465544	0.390791	0.402497
2014	1	21	2	1588.17	25	973.2	70	858.143	897.276	893.553	0.482797	0.395766	0.403077
2014	1	21	3	1588.17	25	973.45	70	906.203	897.849	900.652	0.378938	0.394657	0.389289
2014	1	21	4	1588.17	25	973.7	70	954.263	901.644	906.101	0.302545	0.387412	0.379125
2014	1	21	5	1588.17	25	974.4	70	893.455	897.329	911.355	0.403273	0.395663	0.369652
2014	1	21	6	1588.17	25	975	70	909.351	897.473	910.844	0.373229	0.395384	0.37056
2014	1	21	7	1588.17	25	975.6	70	924.458	905.649	914.434	0.347328	0.379954	0.364244
2014	1	21	8	1588.17	25	976	70	916.359	903.415	907.024	0.360915	0.384091	0.377439
2014	1	21	9	1588.17	25	976.3	70	875.48	904.714	892.642	0.441288	0.381678	0.404894
2014	1	21	10	1588.17	25	976.3	70	899.195	909.846	890.052	0.392066	0.372342	0.410118
2014	1	21	11	1588.17	25	976	70	890.07	907.829	888.258	0.410083	0.375975	0.413792
2014	1	21	12	1588.17	25	976	70	858.403	895.846	885.96	0.482134	0.398553	0.418561
2014	1	21	13	1588.17	25	976.35	70	874.356	893.459	883.017	0.443824	0.403264	0.424779
2014	1	21	14	1588.17	25	976.7	70	890.31	891.079	875.714	0.409595	0.408037	0.440762
2014	1	21	15	1588.17	25	977.2	70	922.157	890.791	877.639	0.351122	0.408618	0.43647
2014	1	21	16	1588.17	25	977.3	70	847.881	882.232	879.417	0.510004	0.426459	0.432558
2014	1	21	17	1588.17	25	977.4	70	896.188	884.82	877.723	0.397884	0.420954	0.436284
2014	1	21	18	1588.17	25	977.9	70	848.286	878.456	883.473	0.508889	0.434665	0.423806
2014	1	21	19	1588.17	25	978.2	70	849.327	873.364	870.042	0.506041	0.446082	0.453753
2014	1	21	20	1588.17	25	978.4	70	927.856	882.045	873.724	0.341824	0.426859	0.44526
2014	1	21	21	1588.17	25	978.55	70	889.172	883.897	878.964	0.411914	0.422906	0.433549
2014	1	21	22	1588.17	25	978.7	70	850.489	878.92	893.415	0.502885	0.433647	0.403353
2014	1	21	23	1588.17	25	978.7	70	906.465	876.958	897.271	0.378458	0.437982	0.395777
2014	1	22	0	1588.17	25	978.6	70	841.756	876.193	904.487	0.527303	0.43969	0.382098
2014	1	22	1	1588.17	25	978.7	70	995.522	888.609	908.508	0.251436	0.413069	0.374746
2014	1	22	2	1588.17	25	978.8	70	900.716	895.163	900.003	0.389167	0.399894	0.390522
2014	1	22	3	1588.17	25	978.8	70	910.157	902.767	902.681	0.371785	0.385302	0.385463
2014	1	22	4	1588.17	25	978.7	70	881.181	896.932	903.07	0.42872	0.396433	0.384734
2014	1	22	5	1588.17	25	978.8	70	888.984	896.909	894.757	0.412299	0.396479	0.400694
2014	1	22	6	1588.17	25	978.9	70	896.787	902.696	893.331	0.396716	0.385434	0.40352
2014	1	22	7	1588.17	25	979.4	70	846.122	895.153	877.033	0.514888	0.399913	0.437816
2014	1	22	8	1588.17	25	979.9	70	907.426	903.362	883.784	0.376705	0.384189	0.423145
2014	1	22	9	1588.17	25	980.2	70	892.716	890.511	880.059	0.404747	0.409186	0.431155
2014	1	22	10	1588.17	25	980	70	879.186	887.82	883.545	0.433063	0.414695	0.423654
2014	1	22	11	1588.17	25	979.8	70	889.166	885.196	882.912	0.411928	0.420163	0.425003
2014	1	22	12	1588.17	25	977.2	70	862.044	882.804	886.694	0.472994	0.425234	0.41703
2014	1	22	13	1588.17	25	977.438	70	896.661	883.764	884.645	0.396961	0.42319	0.421325
2014	1	22	14	1588.17	25	979.5	70	869.417	880.342	881.36	0.455216	0.430539	0.428334
2014	1	22	15	1588.17	25	980.1	70	908.142	888.095	884.975	0.375408	0.414128	0.420628
2014	1	22	16	1588.17	25	980.5	70	876.74	884.259	879.458	0.438468	0.42214	0.432468
2014	1	22	17	1588.17	25	980.9	70	888.928	883.786	875.895	0.412414	0.423143	0.440357
2014	1	22	18	1588.17	25	981.3	70	849.177	880.034	880.239	0.50645	0.431209	0.430763
2014	1	22	19	1588.17	25	981.8	70	912.105	882.902	884.271	0.368325	0.425024	0.422114
2014	1	22	20	1588.17	25	982	70	868.521	883.711	888.719	0.457328	0.4233	0.412843
2014	1	22	21	1588.17	25	982.2	70	848.034	877.633	888.17	0.509582	0.436483	0.413973
2014	1	22	22	1588.17	25	982.3	70	929.139	885.098	898.886	0.339773	0.420369	0.392659
2014	1	22	23	1588.17	25	982.3	70	940.537	889.148	912.291	0.322222	0.411965	0.367998
2014	1	23	0	1588.17	25	982.45	70	912.163	893.576	911.291	0.368223	0.403033	0.369766
2014	1	23	1	1588.17	25	982.6	70	883.79	892.933	904.495	0.423133	0.404312	0.382083
2014	1	23	2	1588.17	25	982.5	70	911.1	900.674	906.692	0.370105	0.389247	0.378044
2014	1	23	3	1588.17	25	983	70	944.381	904.708	905.671	0.316556	0.381689	0.379914
2014	1	23	4	1588.17	25	983.1	70	903.679	909.103	910.272	0.383598	0.373674	0.37158
2014	1	23	5	1588.17	25	983.3	70	819.954	905.593	909.914	0.596386	0.380058	0.37222
2014	1	23	6	1588.17	25	983.6	70	927.801	905.426	919.552	0.341911	0.380365	0.355479
2014	1	23	7	1588.17	25	984	70	945.212	906.01	914.153	0.315348	0.379291	0.364733
2014	1	23	8	1588.17	25	984.45	70	950.546	910.808	906.624	0.307725	0.370624	0.378168
2014	1	23	9	1588.17	25	984.9	70	955.88	919.819	902.265	0.300324	0.355029	0.386243
2014	1	23	10	1588.17	25	984.8	70	835.636	910.386	901.571	0.545454	0.371375	0.387549
2014	1	23	11	1588.17	25	984.6	70	910.516	906.153	906.443	0.371145	0.379029	0.378498
2014	1	23	12	1588.17	25	984.3	70	826.621	896.521	896.016	0.573904	0.397235	0.398221
2014	1	23	13	1588.17	25	984	70	916.424	908.58	893.939	0.360803	0.374617	0.402311
2014	1	23	14	1588.17	25	984.1	70	910.267	906.388	894.203	0.371588	0.378599	0.401788
2014	1	23	15	1588.17	25	984.4	70	911.069	902.12	898.38	0.37016	0.386515	0.393633
2014	1	23	16	1588.17	25	984.5	70	951.688	902.263	912.999	0.306122	0.386247	0.366753
2014	1	23	17	1588.17	25	984.4	70	892.195	894.302	913.786	0.40579	0.401592	0.365374
2014	1	23	18	1588.17	25	984.2	70	893.753	901.567	917.84	0.402679	0.387557	0.35838
2014	1	23	19	1588.17	25	984	70	895.312	899.666	907.519	0.399601	0.391165	0.376537
2014	1	23	20	1588.17	25	983.7	70	912.895	910.451	902.546	0.366934	0.371261	0.385715
2014	1	23	21	1588.17	25	983.2	70	930.921	912.263	897.846	0.336952	0.368048	0.394662
2014	1	23	22	1588.17	25	983.1	70	895.236	910.384	889.446	0.39975	0.37138	0.411355
2014	1	23	23	1588.17	25	982.6	70	876.283	906.036	900.23	0.439487	0.379245	0.39009
2014	1	24	0	1588.17	25	982.2	70	888.874	898.184	904.795	0.412525	0.39401	0.381529
2014	1	24	1	1588.17	25	981.8	70	891.716	898.124	901.868	0.406752	0.394126	0.386989
2014	1	24	2	1588.17	25	981.4	70	909.496	900.092	906.362	0.372968	0.390353	0.378647
2014	1	24	3	1588.17	25	980.9	70	912.283	902.213	911.745	0.368011	0.38634	0.368962
2014	1	24	4	1588.17	25	980.7	70	977.577	910.298	926.327	0.272325	0.371532	0.344287
2014	1	24	5	1588.17	25	980.2	70	898.244	906.214	929.661	0.393894	0.378918	0.338944
2014	1	24	6	1588.17	25	980.5	70	894.71	906.148	928.215	0.400787	0.379039	0.341248
2014	1	24	7	1588.17	25	980.8	70	965.964	917.358	920.141	0.286908	0.359203	0.354487
2014	1	24	8	1588.17	25	981.837	70	916.294	920.786	914.925	0.361028	0.353407	0.363391
2014	1	24	9	1588.17	25	982.138	70	925.814	925.048	908.316	0.345119	0.346365	0.375093
2014	1	24	10	1588.17	25	980.6	70	857.949	918.604	899.642	0.483292	0.357081	0.391212
2014	1	24	11	1588.17	25	980.5	70	893.088	916.205	900.064	0.404003	0.36118	0.390407
2014	1	24	12	1588.17	25	980.4	70	880.384	904.056	889.289	0.430449	0.382898	0.411675
2014	1	24	13	1588.17	25	980.4	70	922.373	907.072	882.282	0.350763	0.377351	0.42635
2014	1	24	14	1588.17	25	980.6	70	878.185	905.006	880.595	0.435264	0.381138	0.42999
2014	1	24	15	1588.17	25	981.05	70	875.454	893.693	878.52	0.441346	0.4028	0.434526
2014	1	24	16	1588.17	25	981.5	70	872.723	888.246	882.139	0.447547	0.413816	0.426657
2014	1	24	17	1588.17	25	982	70	868.521	881.085	884.576	0.457328	0.42893	0.42147
2014	1	24	18	1588.17	25	982.4	70	904.613	886.918	877.64	0.381865	0.416565	0.436468
2014	1	24	19	1588.17	25	982.4	70	859.286	882.692	884.707	0.479896	0.425472	0.421194
2014	1	24	20	1588.17	25	982.7	70	905.651	885.851	898.753	0.37995	0.41879	0.392915
2014	1	24	21	1588.17	25	983	70	912.359	884.599	903.939	0.367877	0.421421	0.383115
2014	1	24	22	1588.17	25	983.3	70	919.067	889.709	910.411	0.356297	0.410817	0.371332
2014	1	24	23	1588.17	25	983.1	70	866.753	888.622	924.524	0.461531	0.413043	0.34722
2014	1	25	0	1588.17	25	982.9	70	1002.01	904.782	926.677	0.244336	0.381552	0.34372
2014	1	25	1	1588.17	25	982.8	70	910.576	910.039	931.292	0.371037	0.371996	0.336368
2014	1	25	2	1588.17	25	982.7	70	901.21	909.614	927.511	0.388231	0.372757	0.342377
2014	1	25	3	1588.17	25	982.9	70	952.142	921.221	924.278	0.305488	0.35268	0.347624
2014	1	25	4	1588.17	25	982.9	70	956.158	927.534	920.096	0.299945	0.34234	0.354563
2014	1	25	5	1588.17	25	983.5	70	864.379	921.536	918.41	0.467261	0.352153	0.357411
2014	1	25	6	1588.17	25	983.7	70	914.054	920.91	911.34	0.364907	0.353199	0.36968
2014	1	25	7	1588.17	25	983.9	70	909.613	926.267	912.87	0.372759	0.344384	0.366979
2014	1	25	8	1588.17	25	984.1	70	905.172	914.163	906.629	0.380833	0.364716	0.378158
2014	1	25	9	1588.17	25	984.15	70	917.364	915.011	905.269	0.359192	0.363242	0.380654
2014	1	25	10	1588.17	25	984.2	70	929.556	918.555	907.375	0.33911	0.357165	0.376799
2014	1	25	11	1588.17	25	983.5	70	916.19	914.061	921.665	0.361205	0.364894	0.351938
2014	1	25	12	1588.17	25	982.9	70	869.129	903.182	917.925	0.455895	0.384525	0.358236
2014	1	25	13	1588.17	25	982.8	70	931.643	911.59	929.195	0.335816	0.369236	0.339684
2014	1	25	14	1588.17	25	982.7	70	958.901	917.196	929.551	0.296228	0.35948	0.339118
2014	1	25	15	1588.17	25	982.7	70	916.14	918.012	925.907	0.361291	0.358088	0.344967
2014	1	25	16	1588.17	25	983	70	958.985	924.739	916.389	0.296115	0.34687	0.360864
2014	1	25	17	1588.17	25	983.1	70	895.726	922.034	916.848	0.398789	0.351326	0.360075
2014	1	25	18	1588.17	25	983.2	70	957.224	925.492	920.037	0.298493	0.345641	0.354662
2014	1	25	19	1588.17	25	978.788	70	845.142	916.611	909.499	0.517637	0.360481	0.372963
2014	1	25	20	1588.17	25	978.6	70	890.791	919.319	907.006	0.408619	0.355872	0.37747
2014	1	25	21	1588.17	25	978.325	70	898.679	915.199	910.136	0.393057	0.362917	0.371823
2014	1	25	22	1588.17	25	981.5	70	972.469	916.895	913.913	0.27863	0.359996	0.365153
2014	1	25	23	1588.17	25	980.6	70	931.788	918.851	924.07	0.335589	0.356664	0.347965
2014	1	26	0	1588.17	25	979.1	70	895.498	910.915	931.722	0.399236	0.370434	0.335693
2014	1	26	1	1588.17	25	977.9	70	944.694	917.036	940.582	0.3161	0.359754	0.322153
2014	1	26	2	1588.17	25	977.4	70	938.709	914.721	938.793	0.324959	0.363745	0.324831
2014	1	26	3	1588.17	25	977.2	70	952.83	928.182	932.628	0.304529	0.3413	0.334276
2014	1	26	4	1588.17	25	977.9	70	928.859	932.941	928.359	0.340219	0.333789	0.341018
2014	1	26	5	1588.17	25	978.5	70	935.958	937.601	932.624	0.329133	0.326632	0.334282
2014	1	26	6	1588.17	25	978.4	70	890.28	927.327	931.098	0.409655	0.342673	0.336673
2014	1	26	7	1588.17	25	978.6	70	940.766	928.449	917.925	0.321879	0.340873	0.358236
2014	1	26	8	1588.17	25	978.9	70	902.029	929.266	915.04	0.386685	0.339571	0.363192
2014	1	26	9	1588.17	25	979.3	70	937.294	928.341	900.784	0.327097	0.341047	0.389039
2014	1	26	10	1588.17	25	978.9	70	895.801	922.977	895.984	0.398641	0.349763	0.398284
2014	1	26	11	1588.17	25	976.175	70	872.601	912.949	887.892	0.447828	0.36684	0.414546
2014	1	26	12	1588.17	25	975.825	70	863.837	904.821	877.504	0.468582	0.381481	0.43677
2014	1	26	13	1588.17	25	978.2	70	894.682	899.661	876.434	0.400842	0.391174	0.439151
2014	1	26	14	1588.17	25	978.3	70	820.602	890.952	865.617	0.594144	0.408294	0.464259
2014	1	26	15	1588.17	25	978.4	70	900.861	885.963	855.643	0.388892	0.418554	0.48923
2014	1	26	16	1588.17	25	978.5	70	848.881	879.32	857.628	0.507259	0.432769	0.484112
2014	1	26	17	1588.17	25	978.1	70	853.68	868.868	857.32	0.494369	0.456508	0.484903
2014	1	26	18	1588.17	25	977.7	70	904.34	869.936	854.119	0.38237	0.454002	0.493213
2014	1	26	19	1588.17	25	977.2	70	762.864	856.218	848.011	0.6	0.48774	0.509646
2014	1	26	20	1588.17	25	976.5	70	881.028	858.367	852.653	0.429052	0.482226	0.497088
2014	1	26	21	1588.17	25	975.6	70	877.044	856.163	852.602	0.43779	0.487884	0.497223
2014	1	26	22	1588.17	25	974.7	70	844.061	859.095	863.947	0.520696	0.480379	0.468315
2014	1	26	23	1588.17	25	973.5	70	848.53	852.554	866.765	0.508219	0.497352	0.461502
2014	1	27	0	1588.17	25	971.8	70	865.532	854.635	871.699	0.464465	0.49186	0.449903
2014	1	27	1	1588.17	25	970.5	70	908.194	861.449	879.371	0.375315	0.474471	0.432657
2014	1	27	2	1588.17	25	969.4	70	891.729	859.873	862.066	0.406726	0.478415	0.472941
2014	1	27	3	1588.17	25	968.65	70	864.618	872.592	858.365	0.466678	0.447848	0.482231
2014	1	27	4	1588.17	25	967.9	70	837.508	867.152	863.734	0.539807	0.460577	0.468835
2014	1	27	5	1588.17	25	968.2	70	855.188	864.42	858.795	0.490416	0.467161	0.48114
2014	1	27	6	1588.17	25	968.4	70	816.722	861.003	852.924	0.6	0.475584	0.496368
2014	1	27	7	1588.17	25	968.9	70	837.17	859.583	849.864	0.54082	0.479147	0.504579
2014	1	27	8	1588.17	25	969.6	70	894.943	863.259	855.254	0.400327	0.469999	0.490243
2014	1	27	9	1588.17	25	970.2	70	894.708	861.573	859.785	0.40079	0.474163	0.478637
2014	1	27	10	1588.17	25	969.8	70	823.818	853.084	858.129	0.583202	0.495943	0.482832
2014	1	27	11	1588.17	25	970	70	862.741	852.85	855.326	0.471273	0.496565	0.490056
2014	1	27	12	1588.17	25	969.7	70	865.113	856.3	856.294	0.46548	0.487528	0.487545
2014	1	27	13	1588.17	25	969.6	70	851.251	855.808	851.541	0.500834	0.488803	0.500055
2014	1	27	14	1588.17	25	969.8	70	826.371	857.014	846.855	0.574726	0.485687	0.512846
2014	1	27	15	1588.17	25	970	70	829.395	856.042	849.238	0.564922	0.488195	0.506283
2014	1	27	16	1588.17	25	970.9	70	873.898	853.412	860.893	0.444864	0.495077	0.475857
2014	1	27	17	1588.17	25	971.5	70	871.765	850.544	859.846	0.449751	0.502738	0.478483
2014	1	27	18	1588.17	25	971.6	70	862.626	855.395	857.056	0.471557	0.489876	0.485579
2014	1	27	19	1588.17	25	971.55	70	863.108	855.441	856.041	0.47037	0.489757	0.488199
2014	1	27	20	1588.17	25	971.5	70	863.59	855.251	857.973	0.469187	0.490252	0.483232
2014	1	27	21	1588.17	25	971.5	70	874.39	858.143	857.423	0.443748	0.482797	0.484638
2014	1	27	22	1588.17	25	971.7	70	814.782	856.694	857.304	0.6	0.486511	0.484942
2014	1	27	23	1588.17	25	971.6	70	830.481	856.83	861.463	0.561461	0.486161	0.474437
2014	1	28	0	1588.17	25	971.5	70	876.863	857.201	864.023	0.438193	0.485208	0.468129
2014	1	28	1	1588.17	25	973.875	70	896.029	860.234	866.926	0.398196	0.477509	0.461117
2014	1	28	2	1588.17	25	973.525	70	884.354	862.95	870.599	0.421938	0.470759	0.452455
2014	1	28	3	1588.17	25	973.513	70	883.017	865.438	872.563	0.424779	0.464692	0.447915
2014	1	28	4	1588.17	25	973.525	70	863.414	865.416	886.93	0.469618	0.464745	0.416539
2014	1	28	5	1588.17	25	973.85	70	858.538	863.435	883.664	0.48179	0.469567	0.423401
2014	1	28	6	1588.17	25	974.075	70	877.915	871.326	872.7	0.43586	0.450765	0.447601
2014	1	28	7	1588.17	25	974.438	70	876.024	877.019	867.326	0.440068	0.437846	0.460162
2014	1	28	8	1588.17	25	974.8	70	874.113	876.676	858.976	0.444376	0.438611	0.480679
2014	1	28	9	1588.17	25	971.4	70	900.725	877.263	853.205	0.389149	0.437305	0.495624
2014	1	28	10	1588.17	25	971	70	791.671	865.677	841.596	0.6	0.464115	0.527767
2014	1	28	11	1588.17	25	970.7	70	818.383	857.598	834.071	0.6	0.48419	0.550241
2014	1	28	12	1588.17	25	970.3	70	840.724	854.762	825.388	0.530302	0.491528	0.577966
2014	1	28	13	1588.17	25	970.2	70	800.348	847.488	821.127	0.6	0.51109	0.592337
2014	1	28	14	1588.17	25	970.2	70	832.961	841.869	815.884	0.553675	0.526979	0.6
2014	1	28	15	1588.17	25	970.1	70	798.746	832.209	816.43	0.6	0.55602	0.6
2014	1	28	16	1588.17	25	970.1	70	857.814	830.171	827.177	0.483637	0.562445	0.572089
2014	1	28	17	1588.17	25	970.1	70	820.871	820.19	824.963	0.593218	0.59557	0.579376
2014	1	28	18	1588.17	25	970.2	70	825.108	824.369	828.295	0.578896	0.581355	0.568458
2014	1	28	19	1588.17	25	970.1	70	815.051	823.953	835.215	0.6	0.582749	0.546736
2014	1	28	20	1588.17	25	969.9	70	851.268	825.271	839.42	0.500789	0.578356	0.534126
2014	1	28	21	1588.17	25	970.05	70	844.508	830.791	845.049	0.519428	0.56048	0.5179
2014	1	28	22	1588.17	25	970.2	70	837.748	831.389	847.336	0.539088	0.558592	0.51151
2014	1	28	23	1588.17	25	970.1	70	871.001	840.421	855.3	0.451521	0.531188	0.490123
2014	1	29	0	1588.17	25	970.1	70	855.889	840.18	852.736	0.488592	0.531892	0.496866
2014	1	29	1	1588.17	25	970.2	70	863.576	845.519	858.264	0.469221	0.516579	0.48249
2014	1	29	2	1588.17	25	970.2	70	847.699	848.342	859.607	0.510507	0.508735	0.479084
2014	1	29	3	1588.17	25	970.5	70	862.177	854.233	857.467	0.472665	0.492913	0.484526
2014	1	29	4	1588.17	25	970.4	70	843.135	853.217	855.819	0.523336	0.495593	0.488773
2014	1	29	5	1588.17	25	970.5	70	839.371	852.575	853.149	0.534272	0.497296	0.495773
2014	1	29	6	1588.17	25	971	70	905.506	861.044	853.214	0.380218	0.47548	0.495601
2014	1	29	7	1588.17	25	971.3	70	838.548	856.988	852.182	0.536707	0.485756	0.498342
2014	1	29	8	1588.17	25	971.3	70	823.411	852.928	856.907	0.584569	0.496358	0.485962
2014	1	29	9	1588.17	25	971.6	70	868.844	853.586	858.502	0.456564	0.494616	0.481883
2014	1	29	10	1588.17	25	971.5	70	862.1	855.386	860.945	0.472856	0.489898	0.475727
2014	1	29	11	1588.17	25	971.4	70	855.923	854.605	863.129	0.488504	0.491939	0.470317
2014	1	29	12	1588.17	25	971.25	70	869.578	857.91	858.829	0.454839	0.483392	0.481052
2014	1	29	13	1588.17	25	971.1	70	883.233	863.393	865.823	0.424318	0.46967	0.463764
2014	1	29	14	1588.17	25	971.6	70	850.824	856.558	862.04	0.501982	0.486863	0.473004
2014	1	29	15	1588.17	25	972	70	855.662	858.697	853.364	0.489183	0.481388	0.495202
2014	1	29	16	1588.17	25	972.4	70	860.499	863.333	851.216	0.476842	0.469818	0.500928
2014	1	29	17	1588.17	25	972.9	70	829.731	858.444	849.376	0.563847	0.482031	0.505908
2014	1	29	18	1588.17	25	973.4	70	856.793	857.78	848.61	0.486258	0.483723	0.508
2014	1	29	19	1588.17	25	973.9	70	829.618	854.492	851.642	0.56421	0.492234	0.499783
2014	1	29	20	1588.17	25	974.9	70	858.81	853.146	858.979	0.481101	0.49578	0.480672
2014	1	29	21	1588.17	25	975.2	70	876.267	852.275	863.587	0.439523	0.498092	0.469194
2014	1	29	22	1588.17	25	975.8	70	870.547	854.741	868.238	0.452576	0.491583	0.457996
2014	1	29	23	1588.17	25	976.3	70	878.449	857.589	875.259	0.434682	0.484212	0.441785
2014	1	30	0	1588.17	25	976.7	70	876.022	859.529	865.762	0.440073	0.479281	0.463911
2014	1	30	1	1588.17	25	976.9	70	867.651	864.269	862.602	0.459389	0.467528	0.471616
2014	1	30	2	1588.17	25	977.1	70	859.28	864.58	857.657	0.47991	0.466771	0.484039
2014	1	30	3	1588.17	25	977.7	70	852.442	867.433	853.331	0.49765	0.459907	0.495291
2014	1	30	4	1588.17	25	977.9	70	844.155	865.602	852.066	0.520429	0.464298	0.498652
2014	1	30	5	1588.17	25	978.2	70	803.637	856.523	862.34	0.6	0.486953	0.472263
2014	1	30	6	1588.17	25	978.5	70	899.152	860.098	870.256	0.39215	0.477848	0.453254
2014	1	30	7	1588.17	25	978.95	70	887.611	861.244	875.771	0.415128	0.474983	0.440635
2014	1	30	8	1588.17	25	979.4	70	876.07	861.25	882.246	0.439965	0.474968	0.426428
2014	1	30	9	1588.17	25	979.55	70	902.053	865.55	879.101	0.386641	0.464422	0.433248
2014	1	30	10	1588.17	25	979.7	70	928.037	874.144	877.081	0.341533	0.444305	0.437708
2014	1	30	11	1588.17	25	979.2	70	835.162	871.984	874.011	0.546897	0.449245	0.444609
2014	1	30	12	1588.17	25	978.9	70	842.581	871.788	863.853	0.524925	0.449699	0.468543
2014	1	30	13	1588.17	25	978.5	70	852.654	877.915	857.235	0.497086	0.43586	0.48512
2014	1	30	14	1588.17	25	978.4	70	819.341	867.939	854.861	0.598518	0.458706	0.491268
2014	1	30	15	1588.17	25	978.4	70	883.1	867.375	851.749	0.424602	0.460046	0.499498
2014	1	30	16	1588.17	25	978.8	70	871.648	866.822	850.633	0.450021	0.461366	0.502498
2014	1	30	17	1588.17	25	979.2	70	860.197	861.59	855.312	0.477601	0.474121	0.490093
2014	1	30	18	1588.17	25	979	70	830.659	849.418	851.33	0.560898	0.505793	0.500622
2014	1	30	19	1588.17	25	978.4	70	872.08	854.032	847.365	0.449025	0.493441	0.511431
2014	1	30	20	1588.17	25	978.1	70	837.502	853.398	846.802	0.539825	0.495114	0.512992
2014	1	30	21	1588.17	25	978.2	70	822.311	849.605	839.301	0.588291	0.505284	0.534476
2014	1	30	22	1588.17	25	978	70	831.629	851.141	839.245	0.557839	0.50113	0.534644
2014	1	30	23	1588.17	25	977.8	70	846.078	846.513	840.666	0.515011	0.513797	0.530473
2014	1	31	0	1588.17	25	977.8	70	851.821	844.034	840.842	0.499306	0.520771	0.529959
2014	1	31	1	1588.17	25	977.8	70	857.564	843.705	842.027	0.484276	0.521707	0.526522
2014	1	31	2	1588.17	25	977.7	70	837.921	844.613	853.073	0.538573	0.519131	0.495973
2014	1	31	3	1588.17	25	977.7	70	849.413	841.78	856.359	0.505807	0.527236	0.487375
2014	1	31	4	1588.17	25	977.75	70	854.478	843.902	862.22	0.492272	0.521149	0.472558
2014	1	31	5	1588.17	25	977.8	70	859.543	848.556	866.654	0.479247	0.508149	0.461769
2014	1	31	6	1588.17	25	978.5	70	894.659	856.435	873.89	0.400887	0.487181	0.444883
2014	1	31	7	1588.17	25	978.8	70	882.72	861.015	875.991	0.425413	0.475553	0.440142
2014	1	31	8	1588.17	25	979	70	852.026	861.04	871.341	0.498758	0.475489	0.450732
2014	1	31	9	1588.17	25	979.7	70	900.925	866.46	870.328	0.388771	0.462232	0.453086
2014	1	31	10	1588.17	25	979.5	70	863.165	869.616	865.918	0.47023	0.45475	0.463535
2014	1	31	11	1588.17	25	979.3	70	860.898	871.052	858.712	0.475845	0.451402	0.481349
2014	1	31	12	1588.17	25	979.5	70	817.839	866.472	848.58	0.6	0.462204	0.508081
2014	1	31	13	1588.17	25	980	70	830.313	862.818	843.082	0.561995	0.471083	0.523487
2014	1	31	14	1588.17	25	980.4	70	889.221	862.138	842.742	0.411814	0.472761	0.524462
2014	1	31	15	1588.17	25	980.1	70	828.359	855.343	837.386	0.568254	0.490011	0.540172
2014	1	31	16	1588.17	25	980.3	70	833.45	853.021	849.449	0.552158	0.49611	0.505708
2014	1	31	17	1588.17	25	980.5	70	839.215	845.308	860.839	0.534731	0.517172	0.475992
2014	1	31	18	1588.17	25	980.7	70	862.247	845.193	865.283	0.472491	0.517495	0.465068
2014	1	31	19	1588.17	25	980.9	70	885.28	848.241	864.855	0.419988	0.509015	0.466103
2014	1	31	20	1588.17	25	980.9	70	869.259	854.668	860.097	0.455589	0.491774	0.477851
2014	1	31	21	1588.17	25	980.7	70	913.978	865.126	869.188	0.365039	0.465447	0.455756
2014	1	31	22	1588.17	25	980.3	70	846.021	859.726	865.468	0.515172	0.478785	0.464621
2014	1	31	23	1588.17	25	980.2	70	811.632	857.635	859.31	0.6	0.484094	0.479836
2014	2	1	0	1588.17	25	980.3	70	860.35	860.998	852.771	0.477216	0.475596	0.496774
2014	2	1	1	1588.17	25	979.9	70	848.081	862.106	847.948	0.509455	0.472841	0.509819
2014	2	1	2	1588.17	25	979.5	70	879.064	864.208	846.331	0.43333	0.467678	0.514304
2014	2	1	3	1588.17	25	979.3	70	817.52	855.738	840.021	0.6	0.488984	0.532361
2014	2	1	4	1588.17	25	978.8	70	851.153	853.475	846.094	0.501097	0.49491	0.514967
2014	2	1	5	1588.17	25	978.4	70	857.513	846.417	851.882	0.484408	0.514065	0.499143
2014	2	1	6	1588.17	25	978.3	70	847.758	846.634	853.144	0.510344	0.51346	0.495786
2014	2	1	7	1588.17	25	978.5	70	842.149	850.448	860.929	0.526169	0.502996	0.475767
2014	2	1	8	1588.17	25	978.2	70	841.427	848.083	864.218	0.528257	0.509448	0.467653
2014	2	1	9	1588.17	25	981.325	70	892.522	853.638	861.536	0.405134	0.494479	0.474254
2014	2	1	10	1588.17	25	981.475	70	891.354	855.175	855.317	0.407481	0.49045	0.490078
2014	2	1	11	1588.17	25	976.7	70	864.635	861.064	852.443	0.466639	0.475431	0.497645
2014	2	1	12	1588.17	25	976.5	70	851.007	861.046	854.07	0.501491	0.475477	0.493342
2014	2	1	13	1588.17	25	976.5	70	811.152	855.25	856.06	0.6	0.490253	0.488151
2014	2	1	14	1588.17	25	976.9	70	800.915	849.395	851.538	0.6	0.505855	0.500063
2014	2	1	15	1588.17	25	977.1	70	886.187	854.9	850.009	0.418087	0.491167	0.504186
2014	2	1	16	1588.17	25	977.6	70	874.047	858.977	852.658	0.444527	0.480677	0.497075
2014	2	1	17	1588.17	25	977.8	70	882.741	857.755	856.436	0.425369	0.483789	0.487176
2014	2	1	18	1588.17	25	977.7	70	861.178	853.983	864.041	0.475145	0.493572	0.468086
2014	2	1	19	1588.17	25	977.6	70	839.616	850.855	868.726	0.533548	0.501898	0.456844
2014	2	1	20	1588.17	25	976.7	70	880.931	854.596	870.353	0.429262	0.491962	0.453026
2014	2	1	21	1588.17	25	977	70	844.517	858.766	862.192	0.519404	0.481211	0.472628
2014	2	1	22	1588.17	25	977.4	70	861.288	866.313	858.781	0.474872	0.462585	0.481175
2014	2	1	23	1588.17	25	977.6	70	889.542	866.732	861.467	0.411159	0.46158	0.474426
2014	2	2	0	1588.17	25	977.5	70	859.343	864.895	869.448	0.479751	0.466008	0.455144
2014	2	2	1	1588.17	25	977.3	70	879.084	864.438	874.894	0.433285	0.467118	0.442608
2014	2	2	2	1588.17	25	977.7	70	845.517	862.48	876.851	0.516583	0.471917	0.438219
2014	2	2	3	1588.17	25	977.5	70	871.07	866.412	883.302	0.45136	0.462349	0.42417
2014	2	2	4	1588.17	25	977.5	70	921.332	871.462	884.332	0.352494	0.450452	0.421984
2014	2	2	5	1588.17	25	978.3	70	895.338	877.814	881.829	0.399551	0.436082	0.427323
2014	2	2	6	1588.17	25	978.9	70	876.292	879.69	882.753	0.439469	0.431961	0.425343
2014	2	2	7	1588.17	25	979.6	70	881.962	878.742	882.986	0.427038	0.434036	0.424844
2014	2	2	8	1588.17	25	980.2	70	877.465	881.007	885.785	0.436857	0.429097	0.418927
2014	2	2	9	1588.17	25	981.15	70	868.704	879.71	877.375	0.456894	0.431917	0.437056
2014	2	2	10	1588.17	25	982.1	70	859.944	881.513	872.394	0.478236	0.428004	0.448303
2014	2	2	11	1588.17	25	982.6	70	886.483	883.44	877.08	0.41747	0.423878	0.437711
2014	2	2	12	1588.17	25	982.9	70	894.211	880.05	873.693	0.401772	0.431176	0.44533
2014	2	2	13	1588.17	25	983.65	70	869.588	876.831	868.378	0.454815	0.438265	0.457664
2014	2	2	14	1588.17	25	984.4	70	844.965	872.915	863.68	0.518136	0.447107	0.468966
2014	2	2	15	1588.17	25	985.2	70	883.522	873.11	855.439	0.423704	0.446661	0.489762
2014	2	2	16	1588.17	25	985.7	70	859.766	870.898	856.264	0.478685	0.451759	0.487622
2014	2	2	17	1588.17	25	986	70	813.003	863.935	852.673	0.6	0.468343	0.497034
2014	2	2	18	1588.17	25	986.2	70	854.308	863.231	854.593	0.492717	0.470068	0.491969
2014	2	2	19	1588.17	25	986.4	70	856.459	859.478	861.108	0.487118	0.479411	0.475322
2014	2	2	20	1588.17	25	986.5	70	863.084	855.587	866.387	0.470428	0.489377	0.462407
2014	2	2	21	1588.17	25	986.6	70	919.571	861.835	871.872	0.355447	0.473513	0.449504
2014	2	2	22	1588.17	25	986.4	70	856.616	863.291	881.638	0.486713	0.46992	0.427735
2014	2	2	23	1588.17	25	986.6	70	886.372	863.647	886.096	0.417701	0.469047	0.418277
2014	2	3	0	1588.17	25	986.35	70	884.106	866.69	882.599	0.422464	0.461682	0.425671
2014	2	3	1	1588.17	25	986.1	70	881.839	875.294	881.094	0.427302	0.441706	0.428909
2014	2	3	2	1588.17	25	986	70	893.458	880.188	878.46	0.403266	0.430874	0.434657
2014	2	3	3	1588.17	25	985.8	70	866.662	881.464	875.441	0.461748	0.428111	0.441376
2014	2	3	4	1588.17	25	985.6	70	860	881.078	879.908	0.478094	0.428944	0.431485
2014	2	3	5	1588.17	25	985.5	70	884.022	876.634	881.913	0.422642	0.438703	0.427144
2014	2	3	6	1588.17	25	985.5	70	888.149	880.576	888.26	0.414015	0.430031	0.413787
2014	2	3	7	1588.17	25	985.3	70	891.081	881.165	897.564	0.408033	0.428757	0.395208
2014	2	3	8	1588.17	25	985.1	70	894.743	882.494	890.335	0.400721	0.425896	0.409544
2014	2	3	9	1588.17	25	984.9	70	898.406	884.565	890.065	0.393582	0.421492	0.410093
2014	2	3	10	1588.17	25	984.6	70	914.27	887.167	882.356	0.36453	0.416047	0.426192
2014	2	3	11	1588.17	25	983.85	70	885.321	889.499	873.041	0.4199	0.411246	0.44682
2014	2	3	12	1588.17	25	983.1	70	856.372	889.046	864.032	0.487341	0.412174	0.468108
2014	2	3	13	1588.17	25	982.8	70	781.975	876.29	855.968	0.6	0.439472	0.488387
2014	2	3	14	1588.17	25	982.5	70	888.91	876.385	850.123	0.412452	0.43926	0.503877
2014	2	3	15	1588.17	25	982.5	70	843.15	870.394	850.83	0.523293	0.452933	0.501965
2014	2	3	16	1588.17	25	982.6	70	869.557	867.245	857.825	0.454889	0.460355	0.483608
2014	2	3	17	1588.17	25	982.6	70	863.086	862.83	875.17	0.470425	0.471053	0.441986
2014	2	3	18	1588.17	25	982.45	70	882.604	858.872	886.022	0.425662	0.480944	0.418431
2014	2	3	19	1588.17	25	982.3	70	902.121	860.972	902.982	0.386512	0.47566	0.3849
2014	2	3	20	1588.17	25	982.3	70	927.898	869.913	910.286	0.341756	0.454056	0.371555
2014	2	3	21	1588.17	25	982.3	70	926.147	887.934	922.292	0.344578	0.414459	0.350898
2014	2	3	22	1588.17	25	982.3	70	924.397	892.37	926.801	0.34743	0.405439	0.34352
2014	2	3	23	1588.17	25	982	70	893.99	898.725	931.922	0.402209	0.392968	0.335379
2014	2	4	0	1588.17	25	981.9	70	971.259	911.438	921.867	0.280149	0.369506	0.351602
2014	2	4	1	1588.17	25	982.2	70	926.217	919.329	915.636	0.344465	0.355855	0.362161
2014	2	4	2	1588.17	25	982.1	70	886.778	919.851	907.902	0.416854	0.354975	0.375843
2014	2	4	3	1588.17	25	982.3	70	902.751	919.93	901.05	0.385332	0.354843	0.388533
2014	2	4	4	1588.17	25	982.3	70	886.879	914.802	887.922	0.416644	0.363604	0.414484
2014	2	4	5	1588.17	25	982.1	70	842.272	904.318	877.656	0.525814	0.382412	0.436432
2014	2	4	6	1588.17	25	982	70	914.617	903.095	867.984	0.363925	0.384687	0.458597
2014	2	4	7	1588.17	25	981.7	70	865.159	899.492	869.57	0.465367	0.391499	0.454859
2014	2	4	8	1588.17	25	981.9	70	852.733	884.676	870.399	0.496875	0.421259	0.452921
2014	2	4	9	1588.17	25	982.1	70	840.307	873.937	867.688	0.531522	0.444776	0.4593
2014	2	4	10	1588.17	25	981.7	70	892.593	874.664	865.553	0.404991	0.443128	0.464415
2014	2	4	11	1588.17	25	981.6	70	891.907	873.309	868.045	0.406368	0.446208	0.458454
2014	2	4	12	1588.17	25	981.4	70	861.21	870.1	864.666	0.475067	0.453618	0.466564
2014	2	4	13	1588.17	25	981.5	70	860.561	872.386	876.018	0.476687	0.448321	0.44008
2014	2	4	14	1588.17	25	981.6	70	859.913	865.548	874.714	0.478315	0.464427	0.443016
2014	2	4	15	1588.17	25	981.9	70	865.72	865.618	878.036	0.464013	0.464258	0.435591
2014	2	4	16	1588.17	25	982.1	70	903.031	871.905	872.082	0.384807	0.449428	0.449022
2014	2	4	17	1588.17	25	982.4	70	881.092	877.003	874.04	0.428914	0.437881	0.444543
2014	2	4	18	1588.17	25	982.1	70	889.312	876.593	874.698	0.411628	0.438795	0.443052
2014	2	4	19	1588.17	25	981.8	70	833.308	869.268	873.708	0.552599	0.455566	0.445298
2014	2	4	20	1588.17	25	981.6	70	901.698	874.329	871.433	0.38731	0.443886	0.450519
2014	2	4	21	1588.17	25	981	70	841.917	871.999	868.428	0.526839	0.449212	0.457547
2014	2	4	22	1588.17	25	980.6	70	879.534	874.451	869.497	0.432302	0.443609	0.455029
2014	2	4	23	1588.17	25	979.9	70	857.502	873.424	870.255	0.484435	0.445944	0.453257
2014	2	5	0	1588.17	25	979.6	70	881.805	870.771	867.844	0.427376	0.452054	0.458931
2014	2	5	1	1588.17	25	979.5	70	874.889	869.995	875.395	0.44262	0.453862	0.441479
2014	2	5	2	1588.17	25	978.8	70	881.881	869.067	871.319	0.427213	0.456041	0.450782
2014	2	5	3	1588.17	25	978.4	70	885.28	875.563	879.954	0.419986	0.441101	0.431385
2014	2	5	4	1588.17	25	977.7	70	838.944	867.719	880.849	0.535532	0.459227	0.42944
2014	2	5	5	1588.17	25	977.05	70	875.338	871.896	877.62	0.441609	0.449448	0.436511
2014	2	5	6	1588.17	25	976.4	70	911.731	875.921	866.775	0.368987	0.440298	0.461479
2014	2	5	7	1588.17	25	975.8	70	854.74	875.576	859.554	0.491585	0.441073	0.479219
2014	2	5	8	1588.17	25	975.3	70	886.936	876.217	854.212	0.416525	0.439635	0.492969
2014	2	5	9	1588.17	25	974.6	70	836.257	871.388	853.576	0.543572	0.450622	0.494643
2014	2	5	10	1588.17	25	973.6	70	804.613	861.73	856.014	0.6	0.473774	0.488269
2014	2	5	11	1588.17	25	972.5	70	837.199	855.72	853.194	0.540733	0.489032	0.495652
2014	2	5	12	1588.17	25	971.6	70	875.732	860.318	853.662	0.440722	0.477296	0.494415
2014	2	5	13	1588.17	25	970.7	70	885.387	861.574	869.307	0.419762	0.47416	0.455476
2014	2	5	14	1588.17	25	979.025	70	889.112	858.747	871.746	0.412038	0.481261	0.449796
2014	2	5	15	1588.17	25	979.225	70	880.073	861.914	886.138	0.431125	0.473318	0.418189
2014	2	5	16	1588.17	25	979.3	70	882.322	861.337	897.739	0.426266	0.474751	0.39487
2014	2	5	17	1588.17	25	972	70	891.578	868.252	894.221	0.40703	0.457963	0.401754
2014	2	5	18	1588.17	25	972.5	70	916.855	882.282	890.191	0.360064	0.426351	0.409836
2014	2	5	19	1588.17	25	973.1	70	852.917	884.247	890.858	0.496387	0.422165	0.408484
2014	2	5	20	1588.17	25	973.8	70	932.333	891.322	889.003	0.334737	0.407546	0.412261
2014	2	5	21	1588.17	25	974.55	70	891.668	892.107	896.233	0.406849	0.405966	0.397797
2014	2	5	22	1588.17	25	975.3	70	851.002	887.343	896.226	0.501502	0.415681	0.39781
2014	2	5	23	1588.17	25	976	70	901.488	890.02	894.867	0.387707	0.410184	0.400477
2014	2	6	0	1588.17	25	976.4	70	906.864	893.088	889.176	0.37773	0.404003	0.411907
2014	2	6	1	1588.17	25	977.9	70	889.718	892.856	888.599	0.4108	0.404467	0.41309
2014	2	6	2	1588.17	25	978.7	70	926.129	894.015	880.428	0.344607	0.402161	0.430353
2014	2	6	3	1588.17	25	979	70	845.759	893.12	882.345	0.515905	0.40394	0.426216
2014	2	6	4	1588.17	25	979.4	70	867.008	884.954	880.722	0.46092	0.420671	0.429715
2014	2	6	5	1588.17	25	979.8	70	853.2	880.146	870.075	0.495637	0.430966	0.453675
2014	2	6	6	1588.17	25	980.3	70	885.059	884.403	866.226	0.420451	0.421835	0.462794
2014	2	6	7	1588.17	25	980.5	70	878.834	881.571	861.924	0.433835	0.427879	0.473292
2014	2	6	8	1588.17	25	980.7	70	872.608	877.289	867.569	0.447811	0.437245	0.459585
2014	2	6	9	1588.17	25	975.425	70	862.773	873.921	884.312	0.471193	0.444812	0.422027
2014	2	6	10	1588.17	25	974.575	70	862.999	866.03	887.696	0.470637	0.463265	0.414951
2014	2	6	11	1588.17	25	979.9	70	891.92	871.8	888.06	0.406341	0.44967	0.414201
2014	2	6	12	1588.17	25	979.6	70	892.732	875.016	887.046	0.404715	0.442334	0.416298
2014	2	6	13	1588.17	25	979.4	70	951.591	887.315	890.169	0.306258	0.415741	0.409881
2014	2	6	14	1588.17	25	979.3	70	893.895	888.419	894.441	0.402399	0.41346	0.401318
2014	2	6	15	1588.17	25	978.7	70	848.865	884.673	897.084	0.507302	0.421265	0.396139
2014	2	6	16	1588.17	25	978.7	70	870.867	884.455	898.285	0.451831	0.421725	0.393815
2014	2	6	17	1588.17	25	978.8	70	906.62	889.936	893.395	0.378176	0.410355	0.403392
2014	2	6	18	1588.17	25	978.35	70	904.688	895.147	887.953	0.381727	0.399925	0.41442
2014	2	6	19	1588.17	25	977.9	70	902.756	896.502	881.257	0.385321	0.397272	0.428558
2014	2	6	20	1588.17	25	977.2	70	888.726	896.001	889.733	0.41283	0.39825	0.410769
2014	2	6	21	1588.17	25	976.4	70	885.058	887.684	886.865	0.420454	0.414976	0.416675
2014	2	6	22	1588.17	25	975.7	70	857.128	883.088	875.961	0.485395	0.424626	0.440209
2014	2	6	23	1588.17	25	975.4	70	867.998	885.48	874.738	0.458565	0.419567	0.442961
2014	2	7	0	1588.17	25	974.7	70	881.659	886.829	876.915	0.42769	0.416749	0.438077
2014	2	7	1	1588.17	25	974	70	895.32	885.417	873.875	0.399585	0.4197	0.444917
2014	2	7	2	1588.17	25	972.9	70	838.708	877.169	883.25	0.536232	0.437513	0.424281
2014	2	7	3	1588.17	25	972.7	70	895.694	876.286	887.066	0.398852	0.43948	0.416256
2014	2	7	4	1588.17	25	972.3	70	936.137	882.213	891.908	0.32886	0.4265	0.406366
2014	2	7	5	1588.17	25	972.3	70	871.219	880.483	892.372	0.451015	0.430234	0.405435
2014	2	7	6	1588.17	25	971.6	70	867.181	881.739	887.907	0.460508	0.427517	0.414515
2014	2	7	7	1588.17	25	971.5	70	937.599	890.439	883.696	0.326635	0.409332	0.423334
2014	2	7	8	1588.17	25	972.1	70	853.747	886.95	885.611	0.494193	0.416496	0.419293
2014	2	7	9	1588.17	25	971.2	70	884.694	885.622	877.017	0.421221	0.419268	0.437852
2014	2	7	10	1588.17	25	970.7	70	873.37	889.955	884.197	0.446067	0.410317	0.422271
2014	2	7	11	1588.17	25	970.7	70	863.773	885.965	889.385	0.46874	0.418551	0.411479
2014	2	7	12	1588.17	25	971.8	70	900.42	881.5	900.234	0.389729	0.428032	0.390083
2014	2	7	13	1588.17	25	972.4	70	926.064	888.356	907.345	0.344712	0.41359	0.376854
2014	2	7	14	1588.17	25	972.7	70	913.731	894.175	922.316	0.36547	0.401844	0.350858
2014	2	7	15	1588.17	25	973.8	70	962.557	897.294	925.081	0.29136	0.39573	0.346311
2014	2	7	16	1588.17	25	973.8	70	885.832	901.305	931.299	0.418829	0.388051	0.336356
2014	2	7	17	1588.17	25	974.5	70	982.431	913.522	932.042	0.266486	0.365835	0.335192
2014	2	7	18	1588.17	25	975.1	70	903.232	917.255	921.17	0.384432	0.359379	0.352765
2014	2	7	19	1588.17	25	975.4	70	902.877	922.143	913.026	0.385095	0.351145	0.366704
2014	2	7	20	1588.17	25	975.7	70	902.523	922.406	907.55	0.385759	0.350709	0.376481
2014	2	7	21	1588.17	25	976.9	70	915.627	921.101	896.987	0.362176	0.352879	0.396327
2014	2	7	22	1588.17	25	977.1	70	880.762	916.98	892.455	0.429627	0.359849	0.405269
2014	2	7	23	1588.17	25	977.2	70	865.837	904.89	884.321	0.46373	0.381353	0.422008
2014	2	8	0	1588.17	25	977.5	70	904.829	907.265	879.07	0.381465	0.376999	0.433316
2014	2	8	1	1588.17	25	977.5	70	885.532	895.153	880.157	0.419457	0.399915	0.430942
2014	2	8	2	1588.17	25	977.5	70	866.235	890.528	883.907	0.462772	0.409152	0.422884
2014	2	8	3	1588.17	25	977.15	70	883.26	888.076	890.076	0.42426	0.414167	0.41007
2014	2	8	4	1588.17	25	976.8	70	900.285	887.796	899.231	0.389985	0.414744	0.391997
2014	2	8	5	1588.17	25	976.4	70	857.746	880.561	905.587	0.48381	0.430064	0.380068
2014	2	8	6	1588.17	25	976	70	973.219	892.118	903.061	0.277694	0.405944	0.384751
2014	2	8	7	1588.17	25	975.6	70	912.536	897.956	906.285	0.367566	0.394451	0.378787
2014	2	8	8	1588.17	25	975	70	904.635	897.931	902.406	0.381825	0.394498	0.385977
2014	2	8	9	1588.17	25	973.8	70	889.836	898.469	894.787	0.410559	0.39346	0.400634
2014	2	8	10	1588.17	25	972.3	70	881.421	900.367	886.822	0.428203	0.389829	0.416763
2014	2	8	11	1588.17	25	970.4	70	855.323	896.875	884.164	0.490064	0.396545	0.422341
2014	2	8	12	1588.17	25	969.1	70	884.379	894.887	866.204	0.421885	0.400437	0.462848
2014	2	8	13	1588.17	25	968.1	70	854.185	894.442	869.935	0.49304	0.401316	0.454004
2014	2	8	14	1588.17	25	967.3	70	883.515	883.229	869.155	0.423718	0.424327	0.455832
2014	2	8	15	1588.17	25	966.6	70	881.343	879.33	873.983	0.428371	0.432748	0.444673
2014	2	8	16	1588.17	25	966.3	70	886.188	877.024	877.872	0.418084	0.437836	0.435954
2014	2	8	17	1588.17	25	965.8	70	842.855	871.151	881.58	0.524137	0.451171	0.42786
2014	2	8	18	1588.17	25	966.3	70	916.825	875.577	887.713	0.360115	0.441071	0.414916
2014	2	8	19	1588.17	25	966.3	70	881.044	878.792	893.747	0.429017	0.433927	0.402693
2014	2	8	20	1588.17	25	966.3	70	912.487	882.305	901.486	0.367653	0.426301	0.38771
2014	2	8	21	1588.17	25	966.3	70	893.015	887.159	908.34	0.40415	0.416063	0.375051
2014	2	8	22	1588.17	25	966.4	70	913.338	890.887	915.751	0.366157	0.408425	0.361962
2014	2	8	23	1588.17	25	966.9	70	940.015	898.221	919.714	0.322999	0.393939	0.355205
2014	2	9	0	1588.17	25	967.3	70	905.148	900.591	913.678	0.380876	0.389404	0.365563
2014	2	9	1	1588.17	25	967	70	942.335	913.026	913.731	0.319556	0.366705	0.36547
2014	2	9	2	1588.17	25	968.4	70	894.53	910.239	917.039	0.401141	0.371638	0.359748
2014	2	9	3	1588.17	25	968.5	70	910.762	913.954	915.984	0.370706	0.365081	0.361561
2014	2	9	4	1588.17	25	968.9	70	888.387	910.941	904.392	0.413526	0.370387	0.382274
2014	2	9	5	1588.17	25	969.3	70	903.126	912.205	902.329	0.38463	0.368149	0.386121
2014	2	9	6	1588.17	25	969.7	70	917.969	912.784	898.181	0.358161	0.367129	0.394015
2014	2	9	7	1588.17	25	970	70	932.262	911.815	893.73	0.334848	0.368838	0.402727
2014	2	9	8	1588.17	25	970.8	70	845.444	904.352	889.864	0.516787	0.382349	0.410502
2014	2	9	9	1588.17	25	971.1	70	865.931	894.801	883.5	0.463503	0.400606	0.42375
2014	2	9	10	1588.17	25	971.2	70	925.415	898.662	886.73	0.345767	0.393089	0.416955
2014	2	9	11	1588.17	25	971.2	70	852.263	891.35	882.989	0.498125	0.40749	0.424838
2014	2	9	12	1588.17	25	970.8	70	892.636	891.881	880.757	0.404905	0.40642	0.429638
2014	2	9	13	1588.17	25	970.8	70	863.426	886.918	884.16	0.469588	0.416563	0.422349
2014	2	9	14	1588.17	25	971	70	911.714	886.137	896.189	0.369017	0.418192	0.397883
2014	2	9	15	1588.17	25	971.1	70	921.25	884.76	898.247	0.352631	0.421081	0.393888
2014	2	9	16	1588.17	25	971.4	70	863.206	886.98	892.345	0.470129	0.416434	0.405489
2014	2	9	17	1588.17	25	971.6	70	895.512	890.678	894.296	0.399209	0.408848	0.401605
2014	2	9	18	1588.17	25	971.5	70	908.995	888.625	885.726	0.373868	0.413036	0.419051
2014	2	9	19	1588.17	25	971.8	70	901.366	894.763	882.166	0.387936	0.400681	0.426599
2014	2	9	20	1588.17	25	972.2	70	865.179	891.331	875.616	0.465319	0.407528	0.440982
2014	2	9	21	1588.17	25	972.6	70	836.473	887.962	877.247	0.542919	0.414402	0.43734
2014	2	9	22	1588.17	25	973.5	70	880.858	884.105	882.268	0.429419	0.422466	0.42638
2014	2	9	23	1588.17	25	973.2	70	878.705	878.787	877.875	0.434119	0.433938	0.435948
2014	2	10	0	1588.17	25	973.4	70	902.27	883.67	883.567	0.386233	0.423389	0.423607
2014	2	10	1	1588.17	25	973.4	70	903.924	884.721	893.184	0.383143	0.421163	0.403812
2014	2	10	2	1588.17	25	973.5	70	905.394	884.271	904.619	0.380424	0.422114	0.381853
2014	2	10	3	1588.17	25	973.6	70	890.3	882.888	909.205	0.409616	0.425054	0.373491
2014	2	10	4	1588.17	25	973.6	70	896.06	886.748	905.764	0.398134	0.416917	0.379744
2014	2	10	5	1588.17	25	973.2	70	943.496	900.126	908.158	0.31785	0.390288	0.375379
2014	2	10	6	1588.17	25	973.1	70	907.416	903.446	909.251	0.376724	0.384033	0.373408
2014	2	10	7	1588.17	25	972.3	70	903.744	906.575	913.697	0.383478	0.378256	0.36553
2014	2	10	8	1588.17	25	971.5	70	893.936	905.534	916.078	0.402317	0.380166	0.361399
2014	2	10	9	1588.17	25	970.5	70	915.248	906.949	922.077	0.362832	0.377574	0.351254
2014	2	10	10	1588.17	25	969	70	941.502	911.463	919.153	0.320787	0.369461	0.356152
2014	2	10	11	1588.17	25	967.8	70	925.024	915.803	913.361	0.346404	0.361872	0.366118
2014	2	10	12	1588.17	25	966.9	70	924.731	919.387	923.743	0.346883	0.355757	0.348502
2014	2	10	13	1588.17	25	966	70	908.796	915.05	920.419	0.374227	0.363175	0.354021
2014	2	10	14	1588.17	25	964.8	70	923.318	917.037	917.684	0.349201	0.359751	0.358647
2014	2	10	15	1588.17	25	964.4	70	879.134	913.961	904.644	0.433177	0.365068	0.381807
2014	2	10	16	1588.17	25	964.2	70	916.155	916.738	893.124	0.361266	0.360264	0.403931
2014	2	10	17	1588.17	25	964.3	70	941.182	919.98	893.681	0.321262	0.354758	0.402822
2014	2	10	18	1588.17	25	964.6	70	837.752	907.011	895.645	0.539077	0.377461	0.398948
2014	2	10	19	1588.17	25	965.1	70	893.605	903.084	898.949	0.402975	0.384708	0.392538
2014	2	10	20	1588.17	25	965.1	70	860.215	895.02	894.215	0.477555	0.400176	0.401764
2014	2	10	21	1588.17	25	965.5	70	919.156	896.315	889.95	0.356147	0.397637	0.410326
2014	2	10	22	1588.17	25	966.2	70	945.775	899.122	892.725	0.314532	0.392207	0.404729
2014	2	10	23	1588.17	25	966.4	70	897.019	901.357	897.11	0.396266	0.387952	0.396089
2014	2	11	0	1588.17	25	967.25	70	875.248	896.244	905.545	0.441811	0.397775	0.380145
2014	2	11	1	1588.17	25	968.1	70	853.477	885.281	900.23	0.494905	0.419985	0.390091
2014	2	11	2	1588.17	25	969.3	70	906.39	893.861	897.817	0.378595	0.402467	0.394718
2014	2	11	3	1588.17	25	970.5	70	959.304	902.073	892.435	0.295687	0.386603	0.405309
2014	2	11	4	1588.17	25	971.5	70	871.869	903.53	889.875	0.449512	0.383876	0.410479
2014	2	11	5	1588.17	25	972.65	70	877.955	898.38	892.4	0.435771	0.393633	0.405378
2014	2	11	6	1588.17	25	973.8	70	884.041	890.663	892.44	0.422601	0.408879	0.405298
2014	2	11	7	1588.17	25	974.3	70	888.438	889.59	892.049	0.413422	0.41106	0.406083
2014	2	11	8	1588.17	25	975.5	70	897.601	892.384	881.535	0.395137	0.40541	0.427958
2014	2	11	9	1588.17	25	976	70	864.523	893.765	873.276	0.466911	0.402656	0.446283
2014	2	11	10	1588.17	25	976.4	70	878.236	890.246	879.586	0.435151	0.409725	0.432186
2014	2	11	11	1588.17	25	976.1	70	885.337	881	872.597	0.419867	0.429113	0.447836
2014	2	11	12	1588.17	25	975.7	70	877.225	881.669	865.546	0.437389	0.427668	0.464431
2014	2	11	13	1588.17	25	975.1	70	837.691	876.636	862.661	0.539258	0.438698	0.471469
2014	2	11	14	1588.17	25	975.25	70	858.514	873.446	860.501	0.481852	0.445895	0.476838
2014	2	11	15	1588.17	25	975.4	70	879.337	872.308	861.269	0.432731	0.4485	0.47492
2014	2	11	16	1588.17	25	975.5	70	832.139	864.125	858.43	0.556238	0.467879	0.482065
2014	2	11	17	1588.17	25	975.8	70	870.9	864.922	860.61	0.451755	0.46594	0.476565
2014	2	11	18	1588.17	25	975.7	70	884.264	865.676	869.115	0.422129	0.464118	0.455926
2014	2	11	19	1588.17	25	975.8	70	864.511	863.073	871.066	0.46694	0.470457	0.45137
2014	2	11	20	1588.17	25	975.4	70	873.2	862.57	882.913	0.446456	0.471695	0.425001
2014	2	11	21	1588.17	25	975	70	881.889	868.094	890.934	0.427195	0.458337	0.408331
2014	2	11	22	1588.17	25	975	70	907.31	874.194	896.142	0.376917	0.444193	0.397974
2014	2	11	23	1588.17	25	974.8	70	905.883	877.512	900.685	0.379525	0.436752	0.389225
2014	2	12	0	1588.17	25	974.2	70	882.515	883.809	905.503	0.425852	0.423093	0.380223
2014	2	12	1	1588.17	25	974.1	70	974.695	896.783	909.847	0.275862	0.396724	0.37234
2014	2	12	2	1588.17	25	973.9	70	866.078	894.51	907.23	0.46315	0.401181	0.377064
2014	2	12	3	1588.17	25	974.2	70	887.303	897.359	905.93	0.415766	0.395605	0.379439
2014	2	12	4	1588.17	25	975.2	70	939.8	905.684	907.474	0.323322	0.37989	0.376619
2014	2	12	5	1588.17	25	975.9	70	891.636	906.902	908.878	0.406913	0.37766	0.37408
2014	2	12	6	1588.17	25	976.9	70	895.284	905.399	908.557	0.399656	0.380414	0.374657
2014	2	12	7	1588.17	25	977.9	70	898.932	904.53	904.263	0.392571	0.382018	0.382513
2014	2	12	8	1588.17	25	978.5	70	932.102	910.729	907.369	0.335098	0.370766	0.376811
2014	2	12	9	1588.17	25	979	70	923.269	904.3	902.297	0.349282	0.382444	0.386182
2014	2	12	10	1588.17	25	978.7	70	885.314	906.705	896.288	0.419916	0.37802	0.39769
2014	2	12	11	1588.17	25	978.5	70	887.466	906.725	897.333	0.415426	0.377983	0.395656
2014	2	12	12	1588.17	25	978.3	70	887.814	900.227	896.922	0.414706	0.390096	0.396453
2014	2	12	13	1588.17	25	978.3	70	871.547	897.716	893.697	0.450255	0.394914	0.402791
2014	2	12	14	1588.17	25	971.763	70	914.682	900.141	890.964	0.363814	0.39026	0.408269
2014	2	12	15	1588.17	25	971.35	70	893.042	899.404	889.934	0.404095	0.391665	0.410359
2014	2	12	16	1588.17	25	971.375	70	901.742	895.61	891.696	0.387226	0.399017	0.406793
2014	2	12	17	1588.17	25	979.8	70	907.508	893.639	897.656	0.376557	0.402906	0.395031
2014	2	12	18	1588.17	25	979.6	70	879.014	892.852	902.423	0.43344	0.404475	0.385946
2014	2	12	19	1588.17	25	979.1	70	892.925	893.534	900.479	0.40433	0.403115	0.389616
2014	2	12	20	1588.17	25	973.3	70	885.041	893.187	897.257	0.420489	0.403805	0.395802
2014	2	12	21	1588.17	25	972.275	70	923.325	899.66	900.729	0.34919	0.391177	0.389143
2014	2	12	22	1588.17	25	978	70	941.879	903.059	905.758	0.320229	0.384754	0.379754
2014	2	12	23	1588.17	25	977.4	70	886.697	902.266	914.301	0.417024	0.38624	0.364476
2014	2	13	0	1588.17	25	976.9	70	878.784	899.396	922.206	0.433944	0.391681	0.35104
2014	2	13	1	1588.17	25	976.7	70	933.449	902.639	920.834	0.332998	0.385541	0.353325
2014	2	13	2	1588.17	25	976.35	70	937.951	910.006	914.237	0.326103	0.372054	0.364587
2014	2	13	3	1588.17	25	976	70	942.452	916.197	913.349	0.319384	0.361193	0.366138
2014	2	13	4	1588.17	25	974.575	70	923.626	921.02	917.483	0.348694	0.353014	0.358989
2014	2	13	5	1588.17	25	975.312	70	892.199	917.13	928.08	0.405781	0.359593	0.341464
2014	2	13	6	1588.17	25	976.9	70	883.217	909.797	925.541	0.424352	0.372429	0.345563
2014	2	13	7	1588.17	25	976.3	70	912.393	913.009	916.403	0.367818	0.366735	0.360839
2014	2	13	8	1588.17	25	974.4	70	976.171	925.182	910.21	0.274044	0.346146	0.37169
2014	2	13	9	1588.17	25	974.3	70	926.914	924.365	908.974	0.343339	0.347481	0.373906
2014	2	13	10	1588.17	25	973	70	912.192	921.145	909.757	0.368171	0.352805	0.3725
2014	2	13	11	1588.17	25	971	70	865.549	911.533	913.271	0.464425	0.369338	0.366275
2014	2	13	12	1588.17	25	969.4	70	893.506	907.768	911.408	0.403172	0.376086	0.369558
2014	2	13	13	1588.17	25	967.2	70	906.182	909.515	909.366	0.378977	0.372934	0.373202
2014	2	13	14	1588.17	25	966.1	70	931.985	915.611	908.757	0.335281	0.362203	0.374297
2014	2	13	15	1588.17	25	964.9	70	917.547	916.256	911.305	0.35888	0.361093	0.369742
2014	2	13	16	1588.17	25	965.2	70	933.268	910.893	915.846	0.333279	0.370473	0.361799
2014	2	13	17	1588.17	25	965.8	70	914.409	909.33	922.727	0.364287	0.373267	0.350178
2014	2	13	18	1588.17	25	966.6	70	930.587	911.629	923.499	0.337478	0.369167	0.348902
2014	2	13	19	1588.17	25	977.175	70	903.183	916.333	920.225	0.384523	0.360959	0.354346
2014	2	13	20	1588.17	25	975.66	70	891.417	916.072	924.374	0.407354	0.361408	0.347466
2014	2	13	21	1588.17	25	969.5	70	957.146	922.443	931.318	0.298599	0.350647	0.336327
2014	2	13	22	1588.17	25	969.7	70	947.887	924.431	937.474	0.311497	0.347374	0.326824
2014	2	13	23	1588.17	25	970.6	70	936.502	926.8	944.603	0.328302	0.343522	0.316233
2014	2	14	0	1588.17	25	971.7	70	930.022	926.394	946.435	0.338371	0.344178	0.313579
2014	2	14	1	1588.17	25	972.9	70	985.005	935.219	944.938	0.263448	0.330266	0.315747
2014	2	14	2	1588.17	25	974.2	70	938.918	936.26	936.89	0.324644	0.328672	0.327711
2014	2	14	3	1588.17	25	975.5	70	936.214	940.389	936.707	0.328741	0.322442	0.327991
2014	2	14	4	1588.17	25	976.6	70	918.797	943.811	932.188	0.356755	0.317388	0.334963
2014	2	14	5	1588.17	25	977.5	70	906.43	937.472	933.483	0.378523	0.326828	0.332946
2014	2	14	6	1588.17	25	978.7	70	908.961	932.606	924.651	0.37393	0.33431	0.347013
2014	2	14	7	1588.17	25	979.7	70	944.067	933.552	917.129	0.317015	0.332839	0.359594
2014	2	14	8	1588.17	25	980.7	70	984.099	940.311	921.454	0.264513	0.322557	0.35229
2014	2	14	9	1588.17	25	981.1	70	871.077	926.07	928.214	0.451343	0.344703	0.34125
2014	2	14	10	1588.17	25	980.6	70	941.949	926.449	930.662	0.320127	0.344089	0.337359
2014	2	14	11	1588.17	25	980.8	70	881.481	919.607	930.765	0.428074	0.355385	0.337197
2014	2	14	12	1588.17	25	980.6	70	953.258	923.915	928.075	0.303934	0.348219	0.341472
2014	2	14	13	1588.17	25	980.9	70	955.403	930.037	926.142	0.300977	0.338348	0.344587
2014	2	14	14	1588.17	25	980.9	70	944.91	934.53	925.939	0.315787	0.331326	0.344915
2014	2	14	15	1588.17	25	980.7	70	896.15	928.541	932.79	0.397958	0.340727	0.334024
2014	2	14	16	1588.17	25	980.6	70	925.406	921.204	928.509	0.345781	0.352707	0.340777
2014	2	14	17	1588.17	25	980.6	70	930.366	928.615	929.404	0.337827	0.340608	0.339352
2014	2	14	18	1588.17	25	980.6	70	935.326	927.788	921.145	0.330102	0.341933	0.352806
2014	2	14	19	1588.17	25	980.1	70	912.642	931.683	922.438	0.367379	0.335754	0.350656
2014	2	14	20	1588.17	25	979.6	70	923.875	928.01	926.611	0.348284	0.341576	0.343828
2014	2	14	21	1588.17	25	979.1	70	935.109	925.473	935.905	0.330435	0.345673	0.329214
2014	2	14	22	1588.17	25	978.4	70	918.285	922.145	922.283	0.357623	0.351141	0.350913
2014	2	14	23	1588.17	25	978	70	928.685	926.212	920.72	0.340496	0.344473	0.353517
2014	2	15	0	1588.17	25	977.7	70	937.238	927.691	919.458	0.327183	0.342088	0.355637
2014	2	15	1	1588.17	25	976.7	70	919.671	926.354	917.014	0.355278	0.344243	0.359791
2014	2	15	2	1588.17	25	975.8	70	907.088	922.824	905.513	0.377321	0.350016	0.380205
2014	2	15	3	1588.17	25	975.7	70	834.25	913.025	900.127	0.549693	0.366706	0.390287
2014	2	15	4	1588.17	25	975	70	964.038	918.045	898.227	0.289415	0.358031	0.393928
2014	2	15	5	1588.17	25	975.2	70	892.777	912.754	899.441	0.404625	0.367182	0.391595
2014	2	15	6	1588.17	25	975.5	70	877.655	907.675	898.491	0.436436	0.376254	0.393419
2014	2	15	7	1588.17	25	976	70	879.393	901.514	904.3	0.43261	0.387657	0.382445
2014	2	15	8	1588.17	25	975.4	70	941.269	902.018	912.157	0.321133	0.386708	0.368234
2014	2	15	9	1588.17	25	975.4	70	921.032	902.188	912.114	0.352994	0.386388	0.368309
2014	2	15	10	1588.17	25	974.9	70	924.841	904.407	909.358	0.346703	0.382247	0.373217
2014	2	15	11	1588.17	25	974.5	70	891.904	911.614	921.543	0.406373	0.369194	0.352142
2014	2	15	12	1588.17	25	974	70	932.996	907.733	920.515	0.333703	0.376148	0.35386
2014	2	15	13	1588.17	25	973.9	70	914.101	910.399	917.45	0.364825	0.371353	0.359046
2014	2	15	14	1588.17	25	973.8	70	891.467	912.125	916.227	0.407253	0.36829	0.361142
2014	2	15	15	1588.17	25	973.6	70	966.627	923.03	916.297	0.286052	0.349677	0.361022
2014	2	15	16	1588.17	25	973.8	70	906.045	918.627	917.438	0.379228	0.357044	0.359066
2014	2	15	17	1588.17	25	973.6	70	887.292	914.409	922.002	0.415788	0.364288	0.351379
2014	2	15	18	1588.17	25	973.7	70	941.095	916.441	923.482	0.321392	0.360775	0.348931
2014	2	15	19	1588.17	25	973.7	70	942.656	922.785	934.061	0.319083	0.350082	0.332051
2014	2	15	20	1588.17	25	974.2	70	902.735	919.002	937.715	0.385361	0.356408	0.32646
2014	2	15	21	1588.17	25	974.6	70	951.811	923.716	934.378	0.30595	0.348546	0.33156
2014	2	15	22	1588.17	25	975.6	70	953.792	931.506	939.24	0.303195	0.336031	0.32416
2014	2	15	23	1588.17	25	977.25	70	950.167	929.449	936.84	0.308259	0.33928	0.327787
2014	2	16	0	1588.17	25	978.9	70	946.542	934.511	930.21	0.313426	0.331355	0.338074
2014	2	16	1	1588.17	25	979.5	70	892.925	935.215	928.654	0.404329	0.330271	0.340546
2014	2	16	2	1588.17	25	979.7	70	909.228	931.232	921.17	0.37345	0.336462	0.352765
2014	2	16	3	1588.17	25	980.3	70	916.034	927.904	905.869	0.361474	0.341746	0.379551
2014	2	16	4	1588.17	25	980.7	70	915.591	929.511	909.919	0.362238	0.339181	0.37221
2014	2	16	5	1588.17	25	981.3	70	917.541	925.228	908.419	0.358891	0.346072	0.374908
2014	2	16	6	1588.17	25	981.8	70	899.963	918.499	906.944	0.390599	0.35726	0.377584
2014	2	16	7	1588.17	25	982.4	70	874.485	909.039	907.472	0.443533	0.37379	0.376623
2014	2	16	8	1588.17	25	982.3	70	923.664	906.179	907.307	0.348632	0.378982	0.376923
2014	2	16	9	1588.17	25	982.9	70	970.282	915.848	908.608	0.281381	0.361794	0.374567
2014	2	16	10	1588.17	25	983.2	70	853.532	908.886	907.87	0.494759	0.374064	0.3759
2014	2	16	11	1588.17	25	982.8	70	895.648	906.338	909.519	0.398942	0.37869	0.372928
2014	2	16	12	1588.17	25	983	70	915.73	906.356	909.567	0.361999	0.378659	0.37284
2014	2	16	13	1588.17	25	983.2	70	935.812	908.639	909.385	0.329356	0.374509	0.373168
2014	2	16	14	1588.17	25	983.2	70	903.266	909.052	905.012	0.384368	0.373765	0.381128
2014	2	16	15	1588.17	25	984	70	891.504	911.18	903.153	0.407179	0.369963	0.38458
2014	2	16	16	1588.17	25	983.9	70	913.16	909.867	911.51	0.36647	0.372304	0.369378
2014	2	16	17	1588.17	25	984.2	70	895.65	900.538	907.487	0.398938	0.389505	0.376596
2014	2	16	18	1588.17	25	984.1	70	917.574	908.543	902.953	0.358833	0.374683	0.384954
2014	2	16	19	1588.17	25	984.05	70	907.317	910.002	908.732	0.376905	0.372063	0.374342
2014	2	16	20	1588.17	25	984	70	897.059	907.668	906.208	0.396187	0.376267	0.378928
2014	2	16	21	1588.17	25	983.8	70	916.196	905.216	903.414	0.361196	0.380752	0.384093
2014	2	16	22	1588.17	25	983.2	70	911.706	906.271	908.322	0.36903	0.378814	0.375082
2014	2	16	23	1588.17	25	983.3	70	904.965	907.953	912.884	0.381215	0.375749	0.366954
2014	2	17	0	1588.17	25	983	70	935.258	910.716	919.37	0.330205	0.370789	0.355785
2014	2	17	1	1588.17	25	982.9	70	855.123	905.65	929.027	0.490585	0.379953	0.339951
2014	2	17	2	1588.17	25	983.1	70	957.048	910.584	927.012	0.298733	0.371023	0.34318
2014	2	17	3	1588.17	25	983.1	70	980.07	919.678	929.127	0.269308	0.355266	0.339792
2014	2	17	4	1588.17	25	983	70	919.541	922.488	935.889	0.355497	0.350572	0.329239
2014	2	17	5	1588.17	25	983.8	70	946.056	926.221	931.292	0.314127	0.344459	0.336367
2014	2	17	6	1588.17	25	984	70	908.526	925.823	917.803	0.374714	0.345103	0.358444
2014	2	17	7	1588.17	25	984	70	873.456	921.885	914.798	0.44587	0.351573	0.363611
2014	2	17	8	1588.17	25	984.4	70	953.604	924.178	897.092	0.303455	0.347788	0.396123
2014	2	17	9	1588.17	25	984.8	70	902.512	930.102	894.088	0.385778	0.338245	0.402017
2014	2	17	10	1588.17	25	984.5	70	835.345	914.889	900.498	0.546339	0.363454	0.389581
2014	2	17	11	1588.17	25	984.5	70	882.616	902.707	901.624	0.425635	0.385413	0.387449
2014	2	17	12	1588.17	25	984.4	70	948.792	906.364	907.642	0.310206	0.378644	0.376313
2014	2	17	13	1588.17	25	984.6	70	906.12	901.372	912.801	0.37909	0.387925	0.367099
2014	2	17	14	1588.17	25	984.7	70	940.608	905.382	910.846	0.322116	0.380446	0.370556
2014	2	17	15	1588.17	25	985.2	70	920.592	911.274	917.643	0.353732	0.369797	0.358717
2014	2	17	16	1588.17	25	985.7	70	900.575	904.645	919.217	0.389433	0.381806	0.356045
2014	2	17	17	1588.17	25	986.1	70	907.359	905.251	907.819	0.376827	0.380687	0.375993
2014	2	17	18	1588.17	25	986.5	70	910.466	914.641	898.827	0.371233	0.363884	0.392772
2014	2	17	19	1588.17	25	986.7	70	890.087	915.575	899.677	0.410048	0.362266	0.391144
2014	2	17	20	1588.17	25	987.1	70	891.295	908.388	899.121	0.4076	0.374964	0.392208
2014	2	17	21	1588.17	25	987.4	70	894.38	906.92	902.687	0.401438	0.377627	0.385451
2014	2	17	22	1588.17	25	987.5	70	901.915	902.084	905.818	0.386901	0.386583	0.379645
2014	2	17	23	1588.17	25	987.7	70	923.751	902.479	903.969	0.348489	0.385842	0.383059
2014	2	18	0	1588.17	25	987.5	70	925.716	905.621	914.942	0.345278	0.380006	0.363363
2014	2	18	1	1588.17	25	987.6	70	922.613	907.528	923.471	0.350366	0.376521	0.34895
2014	2	18	2	1588.17	25	987.6	70	907.538	907.162	929.744	0.376503	0.377187	0.338811
2014	2	18	3	1588.17	25	987.35	70	920.461	910.959	935.899	0.353951	0.370356	0.329223
2014	2	18	4	1588.17	25	987.1	70	933.384	916.22	941.042	0.3331	0.361155	0.32147
2014	2	18	5	1588.17	25	986.8	70	994.678	928.757	940.432	0.252377	0.340382	0.322378
2014	2	18	6	1588.17	25	987	70	914.719	930.357	930.698	0.363748	0.337841	0.337302
2014	2	18	7	1588.17	25	986.7	70	937.354	932.058	929.162	0.327006	0.335167	0.339737
2014	2	18	8	1588.17	25	981.775	70	931.837	932.823	924.659	0.335512	0.333972	0.347
2014	2	18	9	1588.17	25	981.4	70	907.444	930.927	906.481	0.376673	0.336942	0.37843
2014	2	18	10	1588.17	25	983.925	70	868.432	926.039	893.222	0.457538	0.344754	0.403737
2014	2	18	11	1588.17	25	984.7	70	863.005	918.857	883.787	0.470623	0.356654	0.423141
2014	2	18	12	1588.17	25	984	70	942.167	919.955	894.263	0.319803	0.354801	0.401669
2014	2	18	13	1588.17	25	983.1	70	868.834	904.224	897.514	0.456589	0.382586	0.395305
2014	2	18	14	1588.17	25	982.7	70	855.543	896.827	902.151	0.489491	0.396638	0.386456
2014	2	18	15	1588.17	25	983.2	70	948.19	898.182	916.497	0.311064	0.394015	0.360678
2014	2	18	16	1588.17	25	983.5	70	944.466	899.76	925.995	0.316433	0.390986	0.344825
2014	2	18	17	1588.17	25	983.1	70	961.49	906.516	931.439	0.29277	0.378365	0.336137
2014	2	18	18	1588.17	25	982.9	70	905.194	911.111	928.925	0.380791	0.370085	0.340115
2014	2	18	19	1588.17	25	983.3	70	915.668	917.694	932.549	0.362106	0.358629	0.334399
2014	2	18	20	1588.17	25	983.1	70	955.74	919.391	924.822	0.300516	0.355751	0.346733
2014	2	18	21	1588.17	25	983.3	70	896.972	922.908	915.602	0.396356	0.349878	0.36222
2014	2	18	22	1588.17	25	982.7	70	916.602	930.54	907.494	0.360498	0.337552	0.376583
2014	2	18	23	1588.17	25	982.2	70	886.734	922.858	901.376	0.416946	0.34996	0.387916
2014	2	19	0	1588.17	25	981.65	70	896.166	916.821	899.243	0.397927	0.360122	0.391974
2014	2	19	1	1588.17	25	981.1	70	905.598	909.834	899.636	0.380048	0.372362	0.391223
2014	2	19	2	1588.17	25	980.8	70	921.026	911.813	897.753	0.353004	0.368841	0.394843
2014	2	19	3	1588.17	25	980.5	70	861.398	905.03	904.903	0.474599	0.381095	0.38133
2014	2	19	4	1588.17	25	980.9	70	911.776	899.534	906.056	0.368907	0.391417	0.379208
2014	2	19	5	1588.17	25	981.7	70	916.127	901.929	909.883	0.361314	0.386875	0.372275
2014	2	19	6	1588.17	25	982.7	70	945.726	905.569	913.314	0.314603	0.380101	0.3662
2014	2	19	7	1588.17	25	982.7	70	892.277	906.262	918.123	0.405625	0.37883	0.357899
2014	2	19	8	1588.17	25	984	70	919.577	909.188	910.904	0.355437	0.373521	0.370453
2014	2	19	9	1588.17	25	983.24	70	908.367	909.534	917.95	0.375001	0.3729	0.358193
2014	2	19	10	1588.17	25	983.7	70	919.626	909.359	917.542	0.355354	0.373214	0.358888
2014	2	19	11	1588.17	25	983	70	928.946	917.803	918.441	0.340081	0.358444	0.357358
2014	2	19	12	1588.17	25	983.2	70	902.153	916.6	913.477	0.386453	0.360501	0.365914
2014	2	19	13	1588.17	25	983.1	70	868.267	910.617	911.866	0.457928	0.370964	0.368748
2014	2	19	14	1588.17	25	983.2	70	984.839	915.506	906.879	0.263642	0.362385	0.377702
2014	2	19	15	1588.17	25	983	70	907.194	917.371	899.657	0.377128	0.359181	0.391182
2014	2	19	16	1588.17	25	983.1	70	877.108	912.062	895.205	0.437649	0.368401	0.399812
2014	2	19	17	1588.17	25	983.2	70	864.276	906.551	902.679	0.467512	0.378301	0.385466
2014	2	19	18	1588.17	25	983.8	70	897.24	903.753	907.967	0.395835	0.383461	0.375724
2014	2	19	19	1588.17	25	984	70	913.006	901.76	906.675	0.366739	0.387192	0.378074
2014	2	19	20	1588.17	25	984.3	70	894.614	900.818	901.185	0.400977	0.388973	0.388278
2014	2	19	21	1588.17	25	984.5	70	952.254	911.316	913.064	0.305332	0.369721	0.366639
2014	2	19	22	1588.17	25	984.5	70	955.251	907.618	915.765	0.301185	0.376358	0.361939
2014	2	19	23	1588.17	25	984.7	70	869.991	902.967	907.972	0.453872	0.384926	0.375715
2014	2	20	0	1588.17	25	984.3	70	885.534	904.021	907.44	0.419453	0.382963	0.376682
2014	2	20	1	1588.17	25	984.4	70	916.697	910.573	913.14	0.360335	0.371042	0.366504
2014	2	20	2	1588.17	25	984.2	70	903.932	911.41	905.191	0.383128	0.369555	0.380797
2014	2	20	3	1588.17	25	984.5	70	877.451	906.966	898.153	0.436887	0.377545	0.39407
2014	2	20	4	1588.17	25	984.4	70	898.321	907.429	898.361	0.393745	0.376701	0.393669
2014	2	20	5	1588.17	25	984.6	70	974.579	910.22	898.562	0.276005	0.371673	0.393282
2014	2	20	6	1588.17	25	984.9	70	894.538	902.63	889.298	0.401126	0.385557	0.411658
2014	2	20	7	1588.17	25	985	70	812.496	895.444	884.766	0.6	0.399343	0.421069
2014	2	20	8	1588.17	25	985	70	908.811	898.353	885.178	0.3742	0.393684	0.4202
2014	2	20	9	1588.17	25	984.6	70	874.546	893.084	886.987	0.443395	0.404011	0.416421
2014	2	20	10	1588.17	25	984.3	70	865.224	888.246	886.989	0.46521	0.413817	0.416417
2014	2	20	11	1588.17	25	982.5	70	903.887	891.55	890.273	0.383211	0.407086	0.409671
2014	2	20	12	1588.17	25	982.2	70	931.538	895.702	911.955	0.335981	0.398835	0.36859
2014	2	20	13	1588.17	25	981.925	70	915.271	888.289	922.787	0.362792	0.413728	0.350077
2014	2	20	14	1588.17	25	982.3	70	924.066	891.98	918.513	0.347971	0.406221	0.357236
2014	2	20	15	1588.17	25	981.8	70	929.029	906.547	923.416	0.339948	0.378309	0.34904
2014	2	20	16	1588.17	25	981.2	70	931.919	909.435	926.482	0.335384	0.373078	0.344036
2014	2	20	17	1588.17	25	980.8	70	934.186	916.89	921.99	0.331857	0.360003	0.351399
2014	2	20	18	1588.17	25	980.5	70	881.603	918.938	920.519	0.427811	0.356517	0.353853
2014	2	20	19	1588.17	25	980.6	70	913.121	920.092	922.335	0.366538	0.35457	0.350827
2014	2	20	20	1588.17	25	980.2	70	934.891	920.511	919.796	0.33077	0.353867	0.355068
2014	2	20	21	1588.17	25	979.9	70	936.617	923.179	917.806	0.328127	0.34943	0.358439
2014	2	20	22	1588.17	25	979.7	70	907.452	921.102	913.133	0.376659	0.352877	0.366517
2014	2	20	23	1588.17	25	979.4	70	926.124	920.739	915.093	0.344616	0.353484	0.363099
2014	2	21	0	1588.17	25	979.15	70	911.937	918.241	921.176	0.368623	0.357697	0.352754
2014	2	21	1	1588.17	25	978.9	70	897.75	913.687	917.874	0.394848	0.365547	0.358322
2014	2	21	2	1588.17	25	978.5	70	909.118	917.126	909.949	0.373647	0.359599	0.372157
2014	2	21	3	1588.17	25	978.7	70	906.76	916.331	913.021	0.377919	0.360963	0.366713
2014	2	21	4	1588.17	25	978.8	70	948.8	918.07	916.19	0.310196	0.357989	0.361205
2014	2	21	5	1588.17	25	979.05	70	917.163	915.638	907.265	0.359536	0.362157	0.376999
2014	2	21	6	1588.17	25	979.3	70	885.527	912.897	901.498	0.419468	0.366931	0.387686
2014	2	21	7	1588.17	25	985.975	70	883.94	907.624	896.643	0.422815	0.376346	0.396996
2014	2	21	8	1588.17	25	987.675	70	939.509	911.071	895.227	0.323757	0.370157	0.399768
2014	2	21	9	1588.17	25	979.3	70	868.849	907.458	898.919	0.456553	0.376648	0.392595
2014	2	21	10	1588.17	25	978.6	70	850.415	900.12	903.45	0.503086	0.390299	0.384025
2014	2	21	11	1588.17	25	977.7	70	918.977	901.647	913.028	0.35645	0.387405	0.366701
2014	2	21	12	1588.17	25	977.2	70	938.099	900.31	919.914	0.325879	0.389938	0.35487
2014	2	21	13	1588.17	25	976.7	70	957.221	905.317	921.468	0.298498	0.380565	0.352267
2014	2	21	14	1588.17	25	976.7	70	941.09	912.262	916.377	0.321398	0.368048	0.360884
2014	2	21	15	1588.17	25	977	70	915.298	916.182	925.772	0.362745	0.361219	0.345187
2014	2	21	16	1588.17	25	977.9	70	896.901	910.856	923.89	0.396495	0.370538	0.34826
2014	2	21	17	1588.17	25	978.75	70	897.923	914.491	913.115	0.394513	0.364146	0.366548
2014	2	21	18	1588.17	25	979.6	70	898.946	920.557	905.984	0.392544	0.35379	0.37934
2014	2	21	19	1588.17	25	980.4	70	901.415	918.362	901.165	0.387843	0.357493	0.388315
2014	2	21	20	1588.17	25	980.8	70	949.168	919.745	902.713	0.309672	0.355153	0.385402
2014	2	21	21	1588.17	25	981.6	70	889.62	911.295	906.162	0.410999	0.369758	0.379013
2014	2	21	22	1588.17	25	981.65	70	893.942	905.402	901.833	0.402306	0.380409	0.387056
2014	2	21	23	1588.17	25	981.7	70	898.263	903.272	899.412	0.393858	0.384357	0.391651
2014	2	22	0	1588.17	25	981.8	70	904.04	904.165	901.814	0.382927	0.382696	0.387092
2014	2	22	1	1588.17	25	981.9	70	909.818	905.651	906.267	0.372392	0.37995	0.37882
2014	2	22	2	1588.17	25	982.2	70	897.472	905.467	912.114	0.395387	0.380289	0.368309
2014	2	22	3	1588.17	25	982.5	70	885.126	903.431	920.232	0.420311	0.384061	0.354334
2014	2	22	4	1588.17	25	982.5	70	954.057	904.042	921.941	0.302829	0.382923	0.35148
2014	2	22	5	1588.17	25	983	70	957.124	912.48	926.511	0.298629	0.367664	0.343989
2014	2	22	6	1588.17	25	983.5	70	935.619	917.69	925.575	0.329651	0.358636	0.345507
2014	2	22	7	1588.17	25	984	70	919.07	920.291	923.927	0.356293	0.354236	0.3482
2014	2	22	8	1588.17	25	984.3	70	892.228	918.814	929.828	0.405723	0.356726	0.338678
2014	2	22	9	1588.17	25	984.6	70	925.647	920.793	931.596	0.34539	0.353395	0.335891
2014	2	22	10	1588.17	25	984.8	70	938	925.859	921.462	0.326027	0.345046	0.352278
2014	2	22	11	1588.17	25	984.6	70	904.622	928.296	922.263	0.381849	0.341118	0.350946
2014	2	22	12	1588.17	25	984.4	70	943.734	927.006	926.485	0.317501	0.343191	0.344031
2014	2	22	13	1588.17	25	984.8	70	966.762	928.21	926.803	0.285877	0.341255	0.343518
2014	2	22	14	1588.17	25	985	70	905.032	924.387	926.372	0.381092	0.347445	0.344214
2014	2	22	15	1588.17	25	985.6	70	890.388	920.802	923.145	0.409437	0.35338	0.349487
2014	2	22	16	1588.17	25	986.1	70	946.106	927.536	928.813	0.314054	0.342336	0.340293
2014	2	22	17	1588.17	25	986.7	70	922.467	927.139	927.989	0.350608	0.342976	0.341611
2014	2	22	18	1588.17	25	987.1	70	912.059	923.896	929.123	0.368406	0.34825	0.339798
2014	2	22	19	1588.17	25	987.4	70	942.803	928.669	929.686	0.318867	0.340522	0.338903
2014	2	22	20	1588.17	25	987.9	70	952.935	929.819	936.341	0.304383	0.338693	0.328548
2014	2	22	21	1588.17	25	988	70	953.5	928.161	935.842	0.3036	0.341334	0.329311
2014	2	22	22	1588.17	25	988.5	70	891.356	926.452	926.322	0.407477	0.344085	0.344295
2014	2	22	23	1588.17	25	988.9	70	955.571	934.6	922.479	0.300748	0.331219	0.350587
2014	2	23	0	1588.17	25	989.2	70	897.44	928.516	925.848	0.395447	0.340766	0.345064
2014	2	23	1	1588.17	25	989.4	70	923.522	928.648	919.836	0.348865	0.340555	0.355
2014	2	23	2	1588.17	25	989.9	70	908.619	928.218	911.289	0.374546	0.341243	0.369769
2014	2	23	3	1588.17	25	990.5	70	901.147	923.011	914.33	0.388351	0.349707	0.364426
2014	2	23	4	1588.17	25	991.1	70	939.596	921.344	923.098	0.323627	0.352474	0.349564
2014	2	23	5	1588.17	25	991.2	70	959.692	922.118	925.392	0.295167	0.351186	0.345805
2014	2	23	6	1588.17	25	991.7	70	873.817	919.925	930.413	0.44505	0.35485	0.337753
2014	2	23	7	1588.17	25	992.2	70	911.917	914.469	927.786	0.368658	0.364184	0.341935
2014	2	23	8	1588.17	25	992.6	70	983.58	925.236	928.281	0.265124	0.346058	0.341143
2014	2	23	9	1588.17	25	992.5	70	940.289	927.332	927.942	0.322591	0.342665	0.341685
2014	2	23	10	1588.17	25	992.2	70	915.404	928.18	923.276	0.362562	0.341304	0.349271
2014	2	23	11	1588.17	25	991.9	70	890.518	926.852	924.533	0.409171	0.343439	0.347206
2014	2	23	12	1588.17	25	991.5	70	919.004	924.278	927.309	0.356404	0.347624	0.342702
2014	2	23	13	1588.17	25	991.2	70	931.624	920.769	917.973	0.335847	0.353434	0.358154
2014	2	23	14	1588.17	25	990.8	70	927.992	927.541	907.125	0.341606	0.342329	0.377255
2014	2	23	15	1588.17	25	991.1	70	912.054	927.558	908.37	0.368415	0.342301	0.374995
2014	2	23	16	1588.17	25	991.3	70	920.697	919.698	913.384	0.353556	0.355233	0.366078
2014	2	23	17	1588.17	25	991.6	70	894.085	913.922	922.146	0.402021	0.365136	0.35114
2014	2	23	18	1588.17	25	991.5	70	906.963	912.867	924.539	0.377549	0.366983	0.347196
2014	2	23	19	1588.17	25	991.9	70	914.392	915.851	928.018	0.364318	0.361789	0.341563
2014	2	23	20	1588.17	25	991.8	70	954.413	920.277	937.442	0.302338	0.354259	0.326873
2014	2	23	21	1588.17	25	991.6	70	975.39	925.748	945.912	0.275003	0.345225	0.314335
2014	2	23	22	1588.17	25	991.4	70	964.774	930.346	949.321	0.288455	0.337859	0.309455
2014	2	23	23	1588.17	25	991.7	70	926.399	932.139	951.06	0.34417	0.335039	0.307003
2014	2	24	0	1588.17	25	991.2	70	942.787	934.9	949.173	0.31889	0.330756	0.309666
2014	2	24	1	1588.17	25	990.7	70	959.175	943.037	941.577	0.29586	0.318524	0.320676
2014	2	24	2	1588.17	25	985.025	70	923.509	945.105	927.8	0.348887	0.315504	0.341913
2014	2	24	3	1588.17	25	985.325	70	916.289	945.342	923.081	0.361035	0.31516	0.349593
2014	2	24	4	1588.17	25	985.6	70	924.925	941.656	927.382	0.346566	0.320559	0.342585
2014	2	24	5	1588.17	25	985.825	70	932.154	936.251	930.131	0.335016	0.328685	0.338199
2014	2	24	6	1588.17	25	986.4	70	904.543	928.723	927.766	0.381995	0.340437	0.341968
2014	2	24	7	1588.17	25	986.625	70	924.193	928.447	928.038	0.347763	0.340877	0.341532
2014	2	24	8	1588.17	25	988.8	70	973.417	932.275	932.889	0.277448	0.334826	0.333869
2014	2	24	9	1588.17	25	988.3	70	951.846	931.359	935.453	0.305901	0.336262	0.329907
2014	2	24	10	1588.17	25	987.4	70	911.498	929.858	942.93	0.3694	0.338631	0.318681
2014	2	24	11	1588.17	25	986.4	70	928.371	931.368	947.442	0.340998	0.336248	0.312133
2014	2	24	12	1588.17	25	985.8	70	945.01	933.879	947.76	0.315641	0.332332	0.311678
2014	2	24	13	1588.17	25	985.45	70	951.292	936.271	941.855	0.306677	0.328654	0.320264
2014	2	24	14	1588.17	25	985.1	70	957.573	942.9	931.902	0.29802	0.318724	0.335411
2014	2	24	15	1588.17	25	985	70	966.627	948.204	932.469	0.286051	0.311044	0.334525
2014	2	24	16	1588.17	25	985.3	70	904.846	939.633	937.14	0.381434	0.323571	0.327331
2014	2	24	17	1588.17	25	985.5	70	900.608	933.228	932.19	0.389372	0.333342	0.33496
2014	2	24	18	1588.17	25	985.8	70	918.899	934.153	926.668	0.356583	0.331908	0.343735
2014	2	24	19	1588.17	25	985.5	70	920.131	933.123	922.766	0.354505	0.333505	0.350112
2014	2	24	20	1588.17	25	985.6	70	962.189	935.271	924.036	0.291845	0.330186	0.34802
2014	2	24	21	1588.17	25	985.5	70	945.4	934.534	928.005	0.315075	0.33132	0.341585
2014	2	24	22	1588.17	25	985.2	70	900.981	927.46	934.401	0.388664	0.342459	0.331525
2014	2	24	23	1588.17	25	985	70	925.292	922.293	934.02	0.345967	0.350895	0.332114
2014	2	25	0	1588.17	25	984.6	70	935.34	926.105	932.271	0.330079	0.344646	0.334833
2014	2	25	1	1588.17	25	984.4	70	946.937	931.896	924.525	0.312858	0.33542	0.347219
2014	2	25	2	1588.17	25	984.2	70	922.776	932.381	922.446	0.350096	0.334662	0.350643
2014	2	25	3	1588.17	25	984.3	70	914.833	931.719	924.524	0.363551	0.335698	0.347221
2014	2	25	4	1588.17	25	984.6	70	922.247	926.726	926.595	0.350972	0.343642	0.343853
2014	2	25	5	1588.17	25	984.7	70	922.332	923.842	923.102	0.350831	0.348338	0.349557
2014	2	25	6	1588.17	25	985.3	70	901.54	923.912	918.26	0.387608	0.348224	0.357666
2014	2	25	7	1588.17	25	985.2	70	960.322	928.291	922.323	0.294325	0.341127	0.350847
2014	2	25	8	1588.17	25	985.1	70	913.826	925.602	930.016	0.365304	0.345464	0.33838
2014	2	25	9	1588.17	25	984.8	70	923.667	922.693	937	0.348627	0.350234	0.327544
2014	2	25	10	1588.17	25	984.25	70	927.591	923.295	935.82	0.342248	0.34924	0.329345
2014	2	25	11	1588.17	25	983.7	70	931.515	925.38	933.154	0.336017	0.345824	0.333458
2014	2	25	12	1588.17	25	982.8	70	977.195	932.248	929.244	0.272791	0.334868	0.339606
2014	2	25	13	1588.17	25	982.2	70	931.718	933.422	922.671	0.335699	0.333041	0.350269
2014	2	25	14	1588.17	25	981.7	70	916.983	935.352	928.421	0.359845	0.330061	0.340918
2014	2	25	15	1588.17	25	981.6	70	882.388	925.61	927.156	0.426125	0.345449	0.342948
2014	2	25	16	1588.17	25	981.8	70	918	926.132	928.573	0.358108	0.344603	0.340675
2014	2	25	17	1588.17	25	982.5	70	932.412	927.225	929.231	0.334613	0.342837	0.339627
2014	2	25	18	1588.17	25	982.8	70	951.64	930.231	927.512	0.30619	0.33804	0.342375
2014	2	25	19	1588.17	25	983.3	70	961.253	933.948	936.148	0.293085	0.332225	0.328843
2014	2	25	20	1588.17	25	983.6	70	925.619	927.501	937.291	0.345435	0.342392	0.327101
2014	2	25	21	1588.17	25	983.7	70	945.328	929.203	939.116	0.315179	0.339671	0.324347
2014	2	25	22	1588.17	25	983.6	70	924.512	930.144	942.275	0.34724	0.338178	0.319644
2014	2	25	23	1588.17	25	983.6	70	922.405	935.146	941.483	0.35071	0.330378	0.320815
2014	2	26	0	1588.17	25	983.9	70	944.405	938.447	936.406	0.316522	0.325353	0.328448
2014	2	26	1	1588.17	25	983.8	70	920.306	936.934	932.624	0.354211	0.327645	0.334282
2014	2	26	2	1588.17	25	983.8	70	965.168	938.625	928.59	0.287941	0.325086	0.340649
2014	2	26	3	1588.17	25	984	70	964.05	938.974	922.45	0.289398	0.324559	0.350636
2014	2	26	4	1588.17	25	984.2	70	883.799	933.747	920.151	0.423114	0.332537	0.354471
2014	2	26	5	1588.17	25	984.4	70	889.469	926.764	914.033	0.411308	0.34358	0.364943
2014	2	26	6	1588.17	25	985.1	70	907.194	924.6	910.186	0.377128	0.347097	0.371733
2014	2	26	7	1588.17	25	985.1	70	905.463	922.482	914.797	0.380296	0.350583	0.363613
2014	2	26	8	1588.17	25	985.2	70	931.931	920.923	920.067	0.335365	0.353178	0.354613
2014	2	26	9	1588.17	25	985.35	70	931.748	922.353	932.959	0.335653	0.350797	0.33376
2014	2	26	10	1588.17	25	985.5	70	931.564	918.152	945.904	0.33594	0.357849	0.314346
2014	2	26	11	1588.17	25	985.1	70	968.114	918.66	950.528	0.284141	0.356986	0.30775
2014	2	26	12	1588.17	25	984.6	70	976.986	930.309	950.076	0.273046	0.337918	0.308388
2014	2	26	13	1588.17	25	984.4	70	956.097	938.637	952.776	0.300028	0.325067	0.304604
2014	2	26	14	1588.17	25	984.2	70	935.207	942.139	943.764	0.330284	0.319846	0.317457
2014	2	26	15	1588.17	25	984.6	70	918.356	943.75	942.577	0.357503	0.317478	0.3192
2014	2	26	16	1588.17	25	984.8	70	941.227	944.912	937.878	0.321195	0.315783	0.326212
2014	2	26	17	1588.17	25	985.2	70	930.154	944.713	930.996	0.338162	0.316073	0.336834
2014	2	26	18	1588.17	25	985.1	70	948.001	946.768	932.687	0.311334	0.313101	0.334184
2014	2	26	19	1588.17	25	985.6	70	902.326	938.544	936.164	0.386128	0.325207	0.328818
2014	2	26	20	1588.17	25	985.8	70	975.306	938.334	938.999	0.275107	0.325523	0.324523
2014	2	26	21	1588.17	25	985.6	70	927.33	934.738	943.905	0.342668	0.331005	0.317252
2014	2	26	22	1588.17	25	985.9	70	943.987	935.836	945.967	0.317132	0.32932	0.314256
2014	2	26	23	1588.17	25	986.2	70	960.644	941.122	946.582	0.293895	0.321351	0.313369
2014	2	27	0	1588.17	25	986.2	70	931.763	939.939	947.197	0.335628	0.323114	0.312484
2014	2	27	1	1588.17	25	986.3	70	946.415	941.971	945.924	0.313609	0.320093	0.314317
2014	2	27	2	1588.17	25	986.4	70	961.066	943.605	935.194	0.293333	0.317691	0.330304
2014	2	27	3	1588.17	25	986.7	70	932.155	947.333	936.31	0.335014	0.312289	0.328594
2014	2	27	4	1588.17	25	986.9	70	917.658	940.127	934.744	0.35869	0.322832	0.330997
2014	2	27	5	1588.17	25	987.2	70	934.741	941.054	927.376	0.331001	0.321452	0.342594
2014	2	27	6	1588.17	25	980.25	70	907.346	936.473	928.887	0.376852	0.328346	0.340175
2014	2	27	7	1588.17	25	980.2	70	926.297	932.18	926.433	0.344335	0.334975	0.344116
2014	2	27	8	1588.17	25	987.8	70	952.473	934.769	919.307	0.305026	0.330958	0.355892
2014	2	27	9	1588.17	25	987.6	70	928.429	932.521	926.772	0.340906	0.334443	0.343568
2014	2	27	10	1588.17	25	987.3	70	895.718	924.352	929.855	0.398803	0.347502	0.338636
2014	2	27	11	1588.17	25	986.2	70	954.955	927.202	929.446	0.301593	0.342874	0.339285
2014	2	27	12	1588.17	25	984.8	70	911.047	926.376	932.376	0.370199	0.344208	0.334669
2014	2	27	13	1588.17	25	984.2	70	911.566	923.479	927.041	0.369278	0.348936	0.343134
2014	2	27	14	1588.17	25	983.8	70	986.407	933.362	922.729	0.26181	0.333134	0.350173
2014	2	27	15	1588.17	25	982.9	70	909.326	931.24	926.867	0.373274	0.336449	0.343414
2014	2	27	16	1588.17	25	982.6	70	919.476	927.115	932.536	0.355607	0.343014	0.334419
2014	2	27	17	1588.17	25	982.3	70	929.626	927.265	935.581	0.338999	0.342773	0.32971
2014	2	27	18	1588.17	25	981.6	70	912.577	929.372	944.513	0.367493	0.339402	0.316364
2014	2	27	19	1588.17	25	981.2	70	953.406	929.179	952.032	0.30373	0.33971	0.305642
2014	2	27	20	1588.17	25	980.8	70	982.094	938.06	955.508	0.266887	0.325938	0.300834
2014	2	27	21	1588.17	25	980.2	70	976.167	946.135	962.158	0.274049	0.314013	0.291886
2014	2	27	22	1588.17	25	979.6	70	970.24	944.114	966.329	0.281435	0.316946	0.286436
2014	2	27	23	1588.17	25	979	70	956.391	949.997	962.231	0.299627	0.308499	0.291789
2014	2	28	0	1588.17	25	978.6	70	966.45	955.869	955.946	0.28628	0.30034	0.300234
2014	2	28	1	1588.17	25	979.4	70	926.188	955.439	939.218	0.344512	0.300928	0.324193
2014	2	28	2	1588.17	25	978.8	70	914.799	955.717	930.224	0.36361	0.300548	0.338051
2014	2	28	3	1588.17	25	978.7	70	958.311	956.33	927.624	0.297022	0.29971	0.342195
2014	2	28	4	1588.17	25	978.8	70	888.854	944.675	920.923	0.412567	0.316128	0.353177
2014	2	28	5	1588.17	25	978.9	70	915.503	937.092	914.836	0.362391	0.327404	0.363546
2014	2	28	6	1588.17	25	978.9	70	907.319	929.227	912.557	0.376901	0.339633	0.367528
2014	2	28	7	1588.17	25	978.8	70	953.483	928.863	916.343	0.303624	0.340212	0.360943
2014	2	28	8	1588.17	25	978.4	70	916.595	922.631	917.211	0.36051	0.350335	0.359455
2014	2	28	9	1588.17	25	977.5	70	882.002	917.108	915.188	0.426952	0.35963	0.362935
2014	2	28	10	1588.17	25	976.8	70	919.536	917.7	921.921	0.355505	0.358618	0.351513
2014	2	28	11	1588.17	25	975.7	70	943.419	915.839	928.383	0.317963	0.361811	0.340979
2014	2	28	12	1588.17	25	974.6	70	934.587	921.555	935.204	0.331239	0.352122	0.330289
2014	2	28	13	1588.17	25	973.5	70	925.755	922.837	932.657	0.345215	0.349995	0.334231
2014	2	28	14	1588.17	25	972.7	70	932.753	926.016	940.662	0.334082	0.344791	0.322034
2014	2	28	15	1588.17	25	972.3	70	961.87	927.065	945.441	0.292267	0.343096	0.315016
2014	2	28	16	1588.17	25	972	70	971.788	933.964	943.493	0.279484	0.332201	0.317854
2014	2	28	17	1588.17	25	971.9	70	913.25	937.87	936.523	0.366312	0.326225	0.328271
2014	2	28	18	1588.17	25	971.8	70	900.514	935.492	928.503	0.389551	0.329847	0.340787
2014	2	28	19	1588.17	25	971.7	70	957.394	937.239	918.818	0.298264	0.327181	0.35672
2014	2	28	20	1588.17	25	971.6	70	922.324	935.706	911.129	0.350844	0.329519	0.370053
2014	2	28	21	1588.17	25	971.2	70	903.963	932.982	906.976	0.383071	0.333725	0.377525
2014	2	28	22	1588.17	25	970.9	70	873.121	925.528	906.482	0.446635	0.345583	0.378427
2014	2	28	23	1588.17	25	971.15	70	901.761	918.014	924.61	0.387191	0.358084	0.34708
2014	3	1	0	1588.17	25	971.4	70	930.4	912.841	936.341	0.337773	0.36703	0.328548
2014	3	1	1	1588.17	25	971.3	70	960.128	918.701	944.422	0.294584	0.356918	0.316496
2014	3	1	2	1588.17	25	971.4	70	962.283	926.422	952.472	0.291722	0.344134	0.305028
2014	3	1	3	1588.17	25	971.5	70	964.438	927.302	953.168	0.288893	0.342713	0.304059
2014	3	1	4	1588.17	25	971.6	70	1018.32	939.301	960.597	0.227429	0.324068	0.293957
2014	3	1	5	1588.17	25	971.6	70	923.606	941.757	948.526	0.348727	0.32041	0.310585
2014	3	1	6	1588.17	25	971.7	70	913.329	946.783	934.128	0.366172	0.31308	0.331947
2014	3	1	7	1588.17	25	971.7	70	885.921	944.803	919.515	0.418642	0.315943	0.355542
2014	3	1	8	1588.17	25	971.8	70	918.598	943.327	910.382	0.357092	0.318097	0.371383
2014	3	1	9	1588.17	25	971.7	70	958.718	943.151	905.996	0.296474	0.318355	0.379317
2014	3	1	10	1588.17	25	971.4	70	851.532	929.307	909.343	0.50008	0.339505	0.373243
2014	3	1	11	1588.17	25	970.9	70	919.297	923.665	923.446	0.35591	0.34863	0.34899
2014	3	1	12	1588.17	25	969.9	70	928.843	912.481	930.13	0.340244	0.367663	0.338201
2014	3	1	13	1588.17	25	969.2	70	951.117	915.919	935.412	0.306923	0.361672	0.329969
2014	3	1	14	1588.17	25	968.9	70	958.137	921.52	935.671	0.297257	0.35218	0.329573
2014	3	1	15	1588.17	25	968.8	70	958.331	930.572	940.222	0.296996	0.337502	0.32269
2014	3	1	16	1588.17	25	969.1	70	923.198	931.147	946.51	0.3494	0.336596	0.313472
2014	3	1	17	1588.17	25	969.25	70	930.136	927.574	941.299	0.33819	0.342276	0.321089
2014	3	1	18	1588.17	25	969.4	70	937.075	938.267	941.699	0.32743	0.325625	0.320495
2014	3	1	19	1588.17	25	969.25	70	943.807	941.33	942.583	0.317395	0.321041	0.319191
2014	3	1	20	1588.17	25	969.1	70	950.538	944.042	947.653	0.307736	0.317051	0.311831
2014	3	1	21	1588.17	25	969.3	70	931.053	941.534	948.493	0.336743	0.320739	0.310632
2014	3	1	22	1588.17	25	969	70	974.368	943.563	954.48	0.276267	0.317751	0.302245
2014	3	1	23	1588.17	25	969.15	70	964.109	944.285	951.915	0.289322	0.316696	0.305805
2014	3	2	0	1588.17	25	969.3	70	953.851	948.117	946.604	0.303114	0.311168	0.313336
2014	3	2	1	1588.17	25	969.1	70	944.931	949.966	946.13	0.315757	0.308542	0.314019
2014	3	2	2	1588.17	25	969	70	913.44	947.012	942.727	0.365978	0.31275	0.318979
2014	3	2	3	1588.17	25	969.2	70	954.05	948.292	935.345	0.302839	0.310918	0.330073
2014	3	2	4	1588.17	25	969.7	70	914.892	943.837	933.486	0.363448	0.317351	0.332941
2014	3	2	5	1588.17	25	970.25	70	938.604	944.781	930.865	0.325117	0.315975	0.33704
2014	3	2	6	1588.17	25	970.8	70	962.316	943.274	941.481	0.291678	0.318175	0.320819
2014	3	2	7	1588.17	25	971.1	70	917.832	937.49	948.698	0.358394	0.326801	0.31034
2014	3	2	8	1588.17	25	971.7	70	932.986	934.881	949.555	0.333718	0.330785	0.309124
2014	3	2	9	1588.17	25	971.5	70	989.611	940.467	949.901	0.258108	0.322326	0.308634
2014	3	2	10	1588.17	25	971.6	70	933.281	942.947	955.299	0.33326	0.318656	0.30112
2014	3	2	11	1588.17	25	971.2	70	1005.68	949.4	951.347	0.240411	0.309343	0.3066
2014	3	2	12	1588.17	25	971.1	70	910.253	948.82	945.923	0.371614	0.310166	0.314319
2014	3	2	13	1588.17	25	971	70	915.984	945.993	940.641	0.361561	0.314218	0.322066
2014	3	2	14	1588.17	25	971	70	964.677	946.288	931.724	0.28858	0.313792	0.335689
2014	3	2	15	1588.17	25	971.1	70	931.49	947.995	926.498	0.336057	0.311342	0.344011
2014	3	2	16	1588.17	25	971.1	70	903.592	944.321	926.071	0.383761	0.316644	0.344701
2014	3	2	17	1588.17	25	971.05	70	913.056	934.752	929.185	0.366652	0.330985	0.339699
2014	3	2	18	1588.17	25	971	70	922.52	933.406	932.837	0.350519	0.333065	0.33395
2014	3	2	19	1588.17	25	970.8	70	953.148	926.84	925.127	0.304087	0.343458	0.346235
2014	3	2	20	1588.17	25	970.5	70	949.966	931.804	923.626	0.308543	0.335564	0.348694
2014	3	2	21	1588.17	25	969.8	70	919.495	932.243	929.161	0.355574	0.334877	0.339738
2014	3	2	22	1588.17	25	969.3	70	949.44	930.338	928.518	0.309287	0.337871	0.340764
2014	3	2	23	1588.17	25	968.9	70	858.916	921.267	926.849	0.480833	0.352603	0.343442
2014	3	3	0	1588.17	25	968.1	70	928.263	924.351	924.295	0.341171	0.347505	0.347597
2014	3	3	1	1588.17	25	967.4	70	967.732	931.185	923.013	0.28463	0.336536	0.349705
2014	3	3	2	1588.17	25	966.6	70	922.913	931.234	931.767	0.34987	0.336459	0.335623
2014	3	3	3	1588.17	25	965.9	70	913.609	926.292	937.675	0.365683	0.344344	0.326519
2014	3	3	4	1588.17	25	965.7	70	953.284	926.707	937.698	0.303899	0.343673	0.326486
2014	3	3	5	1588.17	25	965	70	941.212	929.421	944.851	0.321218	0.339324	0.315873
2014	3	3	6	1588.17	25	964.6	70	954.782	930.089	941.968	0.30183	0.338265	0.320098
2014	3	3	7	1588.17	25	964.1	70	959.914	942.714	941.288	0.294869	0.318998	0.321104
2014	3	3	8	1588.17	25	963.7	70	907.755	940.15	943.116	0.37611	0.322798	0.318406
2014	3	3	9	1588.17	25	963.5	70	932.084	935.694	944.305	0.335126	0.329537	0.316667
2014	3	3	10	1588.17	25	963.4	70	964.664	940.913	942.065	0.288597	0.321661	0.319955
2014	3	3	11	1588.17	25	963.1	70	954.106	945.975	943.236	0.302761	0.314244	0.31823
2014	3	3	12	1588.17	25	962.3	70	925.942	942.557	945.911	0.34491	0.319228	0.314336
2014	3	3	13	1588.17	25	962	70	935.027	941.784	941.489	0.330561	0.320369	0.320806
2014	3	3	14	1588.17	25	961.9	70	966.42	943.239	940.677	0.286319	0.318227	0.322013
2014	3	3	15	1588.17	25	962.3	70	938.812	940.601	939.953	0.324803	0.322125	0.323092
2014	3	3	16	1588.17	25	962.8	70	936.484	944.192	936.546	0.32833	0.316832	0.328235
2014	3	3	17	1588.17	25	963.3	70	934.156	944.451	937.003	0.331904	0.316454	0.327539
2014	3	3	18	1588.17	25	963.7	70	891.369	935.289	937.481	0.407451	0.330158	0.326814
2014	3	3	19	1588.17	25	964.3	70	960.561	936.096	933.498	0.294005	0.328921	0.332923
2014	3	3	20	1588.17	25	964.5	70	968.91	941.467	929.524	0.283124	0.320839	0.339161
2014	3	3	21	1588.17	25	964.6	70	912.324	938.629	931.413	0.36794	0.325078	0.336178
2014	3	3	22	1588.17	25	964.8	70	929.326	933.993	930.725	0.339476	0.332156	0.33726
2014	3	3	23	1588.17	25	964.75	70	928.548	932.71	934.628	0.340716	0.334149	0.331175
2014	3	4	0	1588.17	25	964.7	70	927.77	931.621	941.055	0.341961	0.335852	0.32145
2014	3	4	1	1588.17	25	964.7	70	938.229	932.13	941.361	0.325682	0.335054	0.320996
2014	3	4	2	1588.17	25	964.7	70	948.688	939.295	946.106	0.310354	0.324078	0.314055
2014	3	4	3	1588.17	25	965.2	70	952.344	938.268	952.859	0.305206	0.325624	0.304489
2014	3	4	4	1588.17	25	965.3	70	980.953	939.773	952.894	0.268248	0.323362	0.30444
2014	3	4	5	1588.17	25	965.8	70	965.072	946.366	958.77	0.288066	0.313679	0.296404
2014	3	4	6	1588.17	25	966.4	70	949.341	948.868	964.537	0.309427	0.310098	0.288763
2014	3	4	7	1588.17	25	967	70	933.61	949.501	963.196	0.332749	0.3092	0.290519
2014	3	4	8	1588.17	25	967.6	70	948.086	952.041	949.806	0.311213	0.305629	0.308769
2014	3	4	9	1588.17	25	968.2	70	962.562	955.082	937.812	0.291354	0.301418	0.326313
2014	3	4	10	1588.17	25	968.6	70	976.919	958.611	932.006	0.273128	0.296618	0.335248
2014	3	4	11	1588.17	25	968.65	70	926.932	955.434	925.762	0.343309	0.300934	0.345202
2014	3	4	12	1588.17	25	968.7	70	876.945	942.433	921.94	0.43801	0.319411	0.351483
2014	3	4	13	1588.17	25	969	70	867.337	930.217	919.249	0.460135	0.338063	0.355991
2014	3	4	14	1588.17	25	969.7	70	945.185	929.697	918.202	0.315387	0.338886	0.357764
2014	3	4	15	1588.17	25	970.3	70	951.362	931.916	912.638	0.306578	0.335388	0.367386
2014	3	4	16	1588.17	25	971.1	70	899.548	925.849	918.59	0.39139	0.345062	0.357105
2014	3	4	17	1588.17	25	972.1	70	941.018	923.156	930.797	0.321505	0.349468	0.337147
2014	3	4	18	1588.17	25	972.8	70	938.336	918.333	937.18	0.32552	0.357541	0.32727
2014	3	4	19	1588.17	25	973.5	70	935.654	919.423	936.105	0.329598	0.355696	0.328909
2014	3	4	20	1588.17	25	974	70	907.043	923.186	932.162	0.377403	0.349419	0.335004
2014	3	4	21	1588.17	25	974.6	70	976.866	936.877	938.004	0.273192	0.327731	0.326022
2014	3	4	22	1588.17	25	975.3	70	932.638	935.308	947.709	0.33426	0.330128	0.311751
2014	3	4	23	1588.17	25	975.8	70	926.851	932.244	947.956	0.34344	0.334875	0.311398
2014	3	5	0	1588.17	25	976.2	70	956.9	939.413	957.007	0.298934	0.3239	0.298788
2014	3	5	1	1588.17	25	976.4	70	979.204	944.187	968.377	0.270352	0.31684	0.283804
2014	3	5	2	1588.17	25	976.7	70	978.619	949.222	979.338	0.27106	0.309596	0.27019
2014	3	5	3	1588.17	25	977.35	70	972.076	953.775	969.716	0.279122	0.303219	0.282099
2014	3	5	4	1588.17	25	978	70	965.533	961.086	971.595	0.287467	0.293307	0.279726
2014	3	5	5	1588.17	25	978.6	70	1002.63	964.306	970.393	0.243667	0.289064	0.281242
2014	3	5	6	1588.17	25	979.7	70	969.7	968.939	956.877	0.28212	0.283087	0.298965
2014	3	5	7	1588.17	25	980.3	70	929.64	969.287	946.164	0.338976	0.282643	0.313971
2014	3	5	8	1588.17	25	981	70	876.106	959.188	938.236	0.439884	0.295842	0.325672
2014	3	5	9	1588.17	25	981.4	70	972.649	958.369	931.095	0.278405	0.296945	0.336677
2014	3	5	10	1588.17	25	981.7	70	935.218	952.944	919.442	0.330267	0.304371	0.355665
2014	3	5	11	1588.17	25	981.5	70	884.373	941.981	908.203	0.421898	0.320079	0.375297
2014	3	5	12	1588.17	25	981.7	70	933.833	938.018	911.376	0.332404	0.326	0.369615
2014	3	5	13	1588.17	25	982.1	70	915.321	927.105	914.436	0.362705	0.34303	0.364241
2014	3	5	14	1588.17	25	982.7	70	901.337	918.56	913.925	0.387991	0.357157	0.365131
2014	3	5	15	1588.17	25	983.3	70	887.352	913.274	913.475	0.415663	0.36627	0.365918
2014	3	5	16	1588.17	25	984.2	70	928.674	919.845	924.489	0.340515	0.354986	0.347278
2014	3	5	17	1588.17	25	985.2	70	954.906	917.627	927.401	0.30166	0.358744	0.342553
2014	3	5	18	1588.17	25	985.9	70	919.606	915.675	928.868	0.355388	0.362093	0.340204
2014	3	5	19	1588.17	25	986.6	70	937.566	922.324	938.385	0.326684	0.350844	0.325447
2014	3	5	20	1588.17	25	987.1	70	973.062	927.228	941.321	0.27789	0.342833	0.321056
2014	3	5	21	1588.17	25	987.6	70	918.658	927.645	945.827	0.356991	0.342162	0.314457
2014	3	5	22	1588.17	25	988.1	70	908.154	928.497	938.158	0.375387	0.340797	0.325789
2014	3	5	23	1588.17	25	988.8	70	973.118	939.218	935.319	0.277819	0.324194	0.330112
2014	3	6	0	1588.17	25	989.5	70	947.923	941.624	938.459	0.311445	0.320607	0.325335
2014	3	6	1	1588.17	25	989.7	70	916.719	936.851	936.929	0.360296	0.327771	0.327653
2014	3	6	2	1588.17	25	990	70	952.098	940.912	937.161	0.305548	0.321662	0.327299
2014	3	6	3	1588.17	25	990.7	70	904.629	936.795	943.668	0.381835	0.327856	0.317598
2014	3	6	4	1588.17	25	991.2	70	962.64	935.492	944.498	0.291251	0.329846	0.316386
2014	3	6	5	1588.17	25	984.225	70	958.583	940.483	944.199	0.296656	0.322301	0.316823
2014	3	6	6	1588.17	25	984.9	70	945.278	945.124	952.028	0.315253	0.315476	0.305647
2014	3	6	7	1588.17	25	993.6	70	953.186	942.632	957.211	0.304034	0.319118	0.298511
2014	3	6	8	1588.17	25	994	70	955.186	943.54	955.491	0.301275	0.317785	0.300857
2014	3	6	9	1588.17	25	994.4	70	957.186	948.598	953.417	0.298545	0.310482	0.303714
2014	3	6	10	1588.17	25	994.7	70	965.597	950.286	948.219	0.287384	0.308092	0.311023
2014	3	6	11	1588.17	25	994.6	70	947.792	955.681	951.574	0.311632	0.300597	0.306281
2014	3	6	12	1588.17	25	994.6	70	933.626	952.054	948.868	0.332724	0.30561	0.310098
2014	3	6	13	1588.17	25	994.7	70	930.034	948.486	937.819	0.338353	0.310643	0.326301
2014	3	6	14	1588.17	25	994.6	70	937.914	947.565	937.961	0.326159	0.311957	0.326086
2014	3	6	15	1588.17	25	994.9	70	974.493	950.228	944.469	0.276112	0.308173	0.316428
2014	3	6	16	1588.17	25	995	70	947.305	949.243	949.555	0.31233	0.309566	0.309124
2014	3	6	17	1588.17	25	995.2	70	902.447	942.401	954.615	0.385901	0.319459	0.30206
2014	3	6	18	1588.17	25	995.5	70	938.655	939.033	958.829	0.325039	0.324471	0.296325
2014	3	6	19	1588.17	25	995.8	70	1025.97	948.805	958.595	0.219934	0.310188	0.29664
2014	3	6	20	1588.17	25	996	70	978.415	954.404	953.19	0.271306	0.30235	0.304029
[truncated: 24,747 more rows]

## Sheet: Exp Filter data
Year	Month	Day	Matlab Days	Daily SWC CRNS, 1 hr (cm3/cm3)	Daily SWC CRNS, MA 8 hr (cm3/cm3)	Daily SWC CRNS, SG 3rd order 13 hr (cm3/cm3)	Exp Filter SWC 0-30 cm (cm3/cm3)	Exp Filter SWC 0-60 cm (cm3/cm3)
2013	12	15	735584	0.369529	0.356581	0.361748	0.343972	0.358167
2013	12	16	735584	0.347813	0.345168	0.344772	0.331881	0.349843
2013	12	17	735586	0.374941	0.366053	0.367735	0.338863	0.354633
2013	12	18	735586	0.36991	0.364347	0.366036	0.341736	0.356605
2013	12	19	735588	0.370275	0.367737	0.369865	0.344584	0.358556
2013	12	20	735588	0.372499	0.370654	0.36949	0.346388	0.359794
2013	12	21	735590	0.39141	0.379555	0.384383	0.350861	0.362846
2013	12	22	735590	0.394952	0.385425	0.386581	0.354629	0.365417
2013	12	23	735592	0.4159	0.412908	0.412159	0.361894	0.370357
2013	12	24	735592	0.391054	0.395002	0.386995	0.363826	0.371684
2013	12	25	735594	0.381731	0.375834	0.380573	0.364498	0.372155
2013	12	26	735594	0.400318	0.392792	0.396074	0.367086	0.373916
2013	12	27	735596	0.40286	0.401806	0.394679	0.369104	0.37529
2013	12	28	735596	0.365279	0.361939	0.364868	0.367423	0.374178
2013	12	29	735598	0.388195	0.380242	0.383267	0.36795	0.374544
2013	12	30	735598	0.366715	0.36859	0.365813	0.366631	0.373673
2013	12	31	735600	0.37571	0.371816	0.369915	0.365865	0.373171
2014	1	1	735600	0.361904	0.358897	0.359225	0.364198	0.372067
2014	1	2	735602	0.347093	0.34708	0.346136	0.361552	0.370311
2014	1	3	735602	0.369083	0.364107	0.364097	0.360695	0.369741
2014	1	4	735604	0.389091	0.382478	0.386791	0.361769	0.37045
2014	1	5	735604	0.387679	0.381223	0.383981	0.362523	0.370949
2014	1	6	735606	0.386624	0.379976	0.379918	0.362903	0.3712
2014	1	7	735606	0.393034	0.39326	0.389855	0.363979	0.37191
2014	1	8	735608	0.38086	0.374333	0.377423	0.364085	0.371982
2014	1	9	735608	0.37823	0.373632	0.372547	0.363846	0.371829
2014	1	10	735610	0.385547	0.384097	0.382046	0.364262	0.372103
2014	1	11	735610	0.392634	0.3787	0.386102	0.364911	0.37253
2014	1	12	735612	0.347231	0.356882	0.347625	0.363073	0.371334
2014	1	13	735612	0.357012	0.348299	0.349761	0.361492	0.370305
2014	1	14	735614	0.367529	0.364049	0.365086	0.360943	0.369946
2014	1	15	735614	0.378707	0.370438	0.372354	0.360859	0.369889
2014	1	16	735616	0.369697	0.368553	0.367089	0.360476	0.369638
2014	1	17	735616	0.375703	0.364422	0.370995	0.360337	0.369545
2014	1	18	735618	0.371964	0.376496	0.371169	0.360216	0.369463
2014	1	19	735618	0.36433	0.362974	0.361952	0.3596	0.369063
2014	1	20	735620	0.396222	0.385945	0.390782	0.360559	0.369676
2014	1	21	735620	0.413932	0.404266	0.409335	0.362438	0.370881
2014	1	22	735622	0.415579	0.413799	0.41096	0.364301	0.372076
2014	1	23	735622	0.39057	0.381716	0.381212	0.364557	0.372244
2014	1	24	735624	0.395739	0.390191	0.388254	0.365151	0.372628
2014	1	25	735624	0.359603	0.359674	0.358302	0.364244	0.372054
2014	1	26	735626	0.418257	0.398116	0.415735	0.366162	0.373278
2014	1	27	735626	0.489863	0.482713	0.483022	0.371199	0.376487
2014	1	28	735628	0.503938	0.507569	0.513427	0.377428	0.380456
2014	1	29	735628	0.486974	0.491493	0.48386	0.381997	0.383375
2014	1	30	735630	0.487642	0.473536	0.482638	0.386301	0.38613
2014	1	31	735630	0.488192	0.490863	0.483126	0.390436	0.388779
2014	2	1	735632	0.486766	0.488349	0.489364	0.394669	0.39149
2014	2	2	735632	0.453176	0.452811	0.448884	0.39693	0.392962
2014	2	3	735634	0.425535	0.435928	0.424312	0.398023	0.393698
2014	2	4	735634	0.439218	0.421154	0.43588	0.39957	0.394718
2014	2	5	735636	0.444997	0.448867	0.441747	0.401304	0.395855
2014	2	6	735636	0.427118	0.420434	0.424427	0.402235	0.396489
2014	2	7	735638	0.401958	0.400836	0.396637	0.401967	0.396372
2014	2	8	735638	0.411541	0.411972	0.409885	0.402257	0.396601
2014	2	9	735640	0.411945	0.397102	0.405445	0.402355	0.396709
2014	2	10	735640	0.380855	0.385384	0.381911	0.401491	0.396216
2014	2	11	735642	0.436156	0.428805	0.430245	0.402608	0.396953
2014	2	12	735642	0.390174	0.391176	0.387404	0.401972	0.3966
2014	2	13	735644	0.360445	0.363631	0.356466	0.400133	0.395501
2014	2	14	735644	0.342586	0.338173	0.339738	0.397703	0.394033
2014	2	15	735646	0.363744	0.362276	0.360236	0.396159	0.393109
2014	2	16	735646	0.375972	0.365279	0.372276	0.395135	0.392503
2014	2	17	735648	0.37489	0.368088	0.369606	0.394044	0.391854
2014	2	18	735648	0.364418	0.361258	0.359441	0.392603	0.390988
2014	2	19	735650	0.379006	0.374504	0.375627	0.391824	0.390527
2014	2	20	735650	0.381881	0.379329	0.377859	0.391154	0.390132
2014	2	21	735652	0.377652	0.369465	0.373113	0.39033	0.38964
2014	2	22	735652	0.349144	0.354226	0.347922	0.388599	0.388593
2014	2	23	735654	0.350368	0.348985	0.346057	0.386856	0.387536
2014	2	24	735654	0.335816	0.330184	0.332999	0.384691	0.38622
2014	2	25	735656	0.340731	0.340594	0.338656	0.382801	0.385068
2014	2	26	735656	0.332396	0.332205	0.331847	0.380724	0.383802
2014	2	27	735658	0.329049	0.3304	0.32706	0.37854	0.382468
2014	2	28	735658	0.3505	0.334486	0.345127	0.37707	0.381565
2014	3	1	735660	0.327808	0.334403	0.326845	0.374995	0.380294
2014	3	2	735660	0.333704	0.322391	0.327347	0.373001	0.37907
2014	3	3	735662	0.326888	0.328245	0.327325	0.371066	0.377881
2014	3	4	735662	0.32988	0.327634	0.325995	0.369143	0.376696
2014	3	5	735664	0.327219	0.3245	0.325579	0.367262	0.375536
2014	3	6	735664	0.314997	0.314204	0.312667	0.36499	0.374138
2014	3	7	735666	0.322935	0.316335	0.320523	0.363054	0.372942
2014	3	8	735666	0.299612	0.302362	0.29611	0.360337	0.371273
2014	3	9	735668	0.299543	0.296334	0.297135	0.357732	0.369671
2014	3	10	735668	0.268583	0.272976	0.266166	0.354149	0.367479
2014	3	11	735670	0.274428	0.270227	0.273465	0.350914	0.365492
2014	3	12	735670	0.290161	0.284538	0.284922	0.348157	0.363789
2014	3	13	735672	0.293463	0.288861	0.291028	0.345681	0.362253
2014	3	14	735672	0.294834	0.294789	0.293644	0.343362	0.360808
2014	3	15	735674	0.30355	0.290865	0.298133	0.341256	0.359489
2014	3	16	735674	0.343961	0.339398	0.3409	0.340628	0.35905
2014	3	17	735676	0.333364	0.333119	0.328646	0.339612	0.35838
2014	3	18	735676	0.326348	0.326323	0.32388	0.338466	0.357633
2014	3	19	735678	0.290074	0.284162	0.284865	0.336069	0.356144
2014	3	20	735678	0.294338	0.291133	0.292415	0.333983	0.354838
2014	3	21	735680	0.298858	0.291494	0.296292	0.33208	0.353639
2014	3	22	735680	0.287183	0.294418	0.285667	0.329881	0.352264
2014	3	23	735682	0.31323	0.302124	0.313187	0.328631	0.35145
2014	3	24	735682	0.363421	0.354012	0.357215	0.328836	0.351495
2014	3	25	735684	0.349172	0.345954	0.34768	0.328728	0.351358
2014	3	26	735684	0.341185	0.337991	0.33322	0.328159	0.35095
2014	3	27	735686	0.325902	0.326088	0.325886	0.32737	0.350414
2014	3	28	735686	0.317735	0.318772	0.316167	0.326291	0.349707
2014	3	29	735688	0.316401	0.310755	0.312217	0.325114	0.348943
2014	3	30	735688	0.30273	0.304557	0.30163	0.32363	0.347999
2014	3	31	735690	0.304097	0.303248	0.301344	0.322175	0.347071
2014	4	1	735690	0.295327	0.290586	0.291117	0.320433	0.345975
2014	4	2	735692	0.302922	0.300511	0.302906	0.319106	0.34512
2014	4	3	735692	0.307473	0.30506	0.304762	0.31787	0.344319
2014	4	4	735694	0.304994	0.309752	0.302326	0.316588	0.343491
2014	4	5	735694	0.313228	0.299517	0.310473	0.315592	0.342831
2014	4	6	735696	0.337124	0.31805	0.329204	0.315205	0.342525
2014	4	7	735696	0.351509	0.362749	0.352789	0.315561	0.342654
2014	4	8	735698	0.323328	0.32292	0.321661	0.314942	0.342218
2014	4	9	735698	0.285972	0.284884	0.282089	0.313112	0.341077
2014	4	10	735700	0.324165	0.318355	0.321692	0.31255	0.340673
2014	4	11	735700	0.334471	0.328154	0.331557	0.312306	0.340454
2014	4	12	735702	0.344228	0.33733	0.337496	0.312251	0.340346
2014	4	13	735702	0.346754	0.342745	0.34392	0.312394	0.340354
2014	4	14	735704	0.362884	0.36134	0.36261	0.313107	0.340695
2014	4	15	735704	0.366282	0.364567	0.363826	0.31384	0.34105
2014	4	16	735706	0.360242	0.355587	0.356507	0.314332	0.341268
2014	4	17	735706	0.351726	0.344398	0.346772	0.314516	0.34131
2014	4	18	735708	0.343126	0.34153	0.341834	0.314546	0.341265
2014	4	19	735708	0.355248	0.343813	0.349077	0.314795	0.341347
2014	4	20	735710	0.377928	0.3697	0.372234	0.31574	0.341833
2014	4	21	735710	0.374723	0.376316	0.370915	0.316623	0.342286
2014	4	22	735712	0.37265	0.371791	0.3703	0.317468	0.342718
2014	4	23	735712	0.340026	0.3418	0.338953	0.317347	0.342598
2014	4	24	735714	0.355693	0.345168	0.349813	0.317556	0.342669
2014	4	25	735714	0.406219	0.396386	0.403483	0.319374	0.343665
2014	4	26	735716	0.375844	0.385216	0.372727	0.320228	0.344112
2014	4	27	735716	0.34327	0.334314	0.340649	0.3201	0.343997
2014	4	28	735718	0.353772	0.35488	0.347437	0.320178	0.344001
2014	4	29	735718	0.400385	0.38181	0.397051	0.321738	0.344856
2014	4	30	735720	0.382279	0.385546	0.378022	0.322694	0.345368
2014	5	1	735720	0.340916	0.342429	0.338036	0.322437	0.345188
2014	5	2	735722	0.338624	0.330919	0.336595	0.322143	0.344986
2014	5	3	735722	0.382984	0.37511	0.377473	0.323071	0.345484
2014	5	4	735724	0.343767	0.347386	0.342945	0.322952	0.345386
2014	5	5	735724	0.344028	0.34098	0.342446	0.322822	0.345282
2014	5	6	735726	0.337162	0.336651	0.336272	0.322512	0.345075
2014	5	7	735726	0.341716	0.34156	0.342111	0.322381	0.344971
2014	5	8	735728	0.332652	0.330175	0.328224	0.321842	0.344635
2014	5	9	735728	0.34919	0.338317	0.341659	0.321713	0.344531
2014	5	10	735730	0.351159	0.353655	0.348842	0.321797	0.344549
2014	5	11	735730	0.363788	0.358113	0.361828	0.322263	0.344785
2014	5	12	735732	0.35858	0.352688	0.354874	0.322513	0.3449
2014	5	13	735732	0.351953	0.348032	0.349373	0.322597	0.344921
2014	5	14	735734	0.380479	0.378331	0.380023	0.323578	0.345452
2014	5	15	735734	0.391706	0.388432	0.390784	0.324854	0.346152
2014	5	16	735736	0.399861	0.397405	0.39913	0.326347	0.346978
2014	5	17	735736	0.451914	0.437765	0.446893	0.329205	0.348581
2014	5	18	735738	0.464313	0.463976	0.460164	0.332389	0.350373
2014	5	19	735738	0.424464	0.424333	0.421109	0.334364	0.351487
2014	5	20	735740	0.402394	0.403667	0.402359	0.335748	0.35227
2014	5	21	735740	0.404074	0.40212	0.400431	0.337046	0.353008
2014	5	22	735742	0.382994	0.383557	0.381436	0.337763	0.353419
2014	5	23	735742	0.394503	0.385732	0.39023	0.33872	0.353967
2014	5	24	735744	0.362987	0.363942	0.35917	0.338754	0.353996
2014	5	25	735744	0.353337	0.357339	0.35397	0.338635	0.353939
2014	5	26	735746	0.361573	0.352561	0.358062	0.338638	0.353949
2014	5	27	735746	0.346071	0.342641	0.341986	0.338174	0.353697
2014	5	28	735748	0.454148	0.434299	0.448802	0.340818	0.355193
2014	5	29	735748	0.463165	0.46035	0.45729	0.343651	0.356801
2014	5	30	735750	0.426001	0.423943	0.423966	0.345459	0.357837
2014	5	31	735750	0.436347	0.428018	0.433034	0.347491	0.359002
2014	6	1	735752	0.447954	0.437924	0.441097	0.349713	0.360277
2014	6	2	735752	0.401379	0.413995	0.402285	0.350767	0.3609
2014	6	3	735754	0.390261	0.388389	0.388531	0.351401	0.361288
2014	6	4	735754	0.417276	0.408979	0.410824	0.352665	0.362031
2014	6	5	735756	0.396416	0.392032	0.394696	0.353437	0.362499
2014	6	6	735756	0.35872	0.36427	0.354386	0.353032	0.362308
2014	6	7	735758	0.338216	0.33798	0.339381	0.352202	0.361879
2014	6	8	735758	0.34512	0.343092	0.338204	0.351357	0.361438
2014	6	9	735760	0.338759	0.332196	0.33424	0.350415	0.360941
2014	6	10	735760	0.316103	0.317968	0.313939	0.34891	0.360126
2014	6	11	735762	0.30639	0.304255	0.307293	0.347245	0.359219
2014	6	12	735762	0.329003	0.324282	0.32425	0.346101	0.3586
2014	6	13	735764	0.266786	0.276908	0.266679	0.34333	0.357068
2014	6	14	735764	0.266705	0.259993	0.263503	0.340525	0.355513
2014	6	15	735766	0.270429	0.269029	0.266845	0.337875	0.354037
2014	6	16	735766	0.258449	0.25329	0.255499	0.334955	0.352407
2014	6	17	735768	0.248363	0.252443	0.248434	0.331893	0.350691
2014	6	18	735768	0.260136	0.253853	0.257829	0.329164	0.349155
2014	6	19	735770	0.243646	0.247276	0.24293	0.326065	0.347409
2014	6	20	735770	0.298664	0.279953	0.295322	0.324529	0.346527
2014	6	21	735772	0.308414	0.313061	0.306912	0.323356	0.345844
2014	6	22	735772	0.284377	0.281152	0.280666	0.321457	0.344756
2014	6	23	735774	0.28482	0.284137	0.284326	0.319702	0.343745
2014	6	24	735774	0.262442	0.262065	0.259373	0.317271	0.342355
2014	6	25	735776	0.309775	0.298622	0.309748	0.316328	0.341788
2014	6	26	735776	0.296507	0.298941	0.29001	0.314841	0.340917
2014	6	27	735778	0.291033	0.288374	0.290375	0.313395	0.340068
2014	6	28	735778	0.288407	0.287511	0.28466	0.311817	0.339142
2014	6	29	735780	0.283439	0.282358	0.281647	0.310185	0.338185
2014	6	30	735780	0.363651	0.347443	0.360832	0.31084	0.338495
2014	7	1	735782	0.334975	0.336551	0.333839	0.310715	0.338373
2014	7	2	735782	0.374389	0.366163	0.367706	0.311555	0.338788
2014	7	3	735784	0.330643	0.33345	0.328736	0.31127	0.338582
2014	7	4	735784	0.351699	0.343868	0.352433	0.311664	0.338752
2014	7	5	735786	0.363166	0.356597	0.353871	0.312091	0.338942
2014	7	6	735786	0.320874	0.326673	0.321116	0.311579	0.338614
2014	7	7	735788	0.322858	0.315352	0.318931	0.311016	0.338256
2014	7	8	735788	0.33207	0.322961	0.329249	0.310756	0.338067
2014	7	9	735790	0.336514	0.339478	0.330138	0.310528	0.337895
2014	7	10	735790	0.297424	0.298603	0.296132	0.309339	0.337192
2014	7	11	735792	0.32081	0.311599	0.32085	0.308875	0.336889
2014	7	12	735792	0.371174	0.360507	0.363568	0.309632	0.33726
2014	7	13	735794	0.357076	0.355809	0.357975	0.310216	0.337538
2014	7	14	735794	0.345582	0.347383	0.343907	0.310388	0.33759
2014	7	15	735796	0.326612	0.328388	0.326382	0.310061	0.337368
2014	7	16	735796	0.315753	0.316716	0.309878	0.309273	0.336891
2014	7	17	735798	0.305683	0.30284	0.303475	0.30832	0.336322
2014	7	18	735798	0.287587	0.28777	0.284959	0.306862	0.335473
2014	7	19	735800	0.287733	0.283873	0.285541	0.30545	0.334647
2014	7	20	735800	0.310896	0.29468	0.308341	0.304712	0.334191
2014	7	21	735802	0.310702	0.321342	0.309418	0.304019	0.333759
2014	7	22	735802	0.305833	0.297044	0.301125	0.303106	0.333205
2014	7	23	735804	0.324294	0.316522	0.320999	0.302773	0.33297
2014	7	24	735804	0.321392	0.323399	0.320185	0.302424	0.332726
2014	7	25	735806	0.316809	0.307641	0.312399	0.301862	0.332365
2014	7	26	735806	0.315682	0.32141	0.314914	0.301382	0.332049
2014	7	27	735808	0.32732	0.317746	0.323605	0.301158	0.331873
2014	7	28	735808	0.34175	0.334822	0.338685	0.301364	0.331935
2014	7	29	735810	0.322722	0.330387	0.323742	0.301144	0.331763
2014	7	30	735810	0.319181	0.316127	0.317413	0.300749	0.331496
2014	7	31	735812	0.404727	0.382969	0.399766	0.302687	0.332512
2014	8	1	735812	0.388066	0.38757	0.385012	0.304169	0.333281
2014	8	2	735814	0.379279	0.380217	0.375147	0.305343	0.333886
2014	8	3	735814	0.355479	0.354392	0.353289	0.305877	0.334141
2014	8	4	735816	0.336328	0.334725	0.333291	0.305836	0.334083
2014	8	5	735816	0.301294	0.306998	0.301361	0.304896	0.333531
2014	8	6	735818	0.28838	0.28256	0.285153	0.303518	0.332737
2014	8	7	735818	0.288569	0.293329	0.284532	0.30215	0.331947
2014	8	8	735820	0.276026	0.271715	0.273106	0.300489	0.330993
2014	8	9	735820	0.319358	0.289401	0.312545	0.299971	0.330664
2014	8	10	735822	0.382554	0.382416	0.379039	0.301337	0.331368
2014	8	11	735822	0.378854	0.379223	0.380933	0.302728	0.33209
2014	8	12	735824	0.412232	0.399576	0.404828	0.304764	0.333169
2014	8	13	735824	0.423595	0.416038	0.41561	0.307063	0.334397
2014	8	14	735826	0.408305	0.409795	0.40326	0.308968	0.335415
2014	8	15	735826	0.361352	0.36365	0.360025	0.309618	0.335749
2014	8	16	735828	0.359215	0.356116	0.356172	0.310146	0.336018
2014	8	17	735828	0.341705	0.341399	0.338502	0.310167	0.336011
2014	8	18	735830	0.329826	0.328856	0.328938	0.309919	0.335856
2014	8	19	735830	0.3516	0.345572	0.34755	0.310198	0.33599
2014	8	20	735832	0.355538	0.346061	0.352037	0.310599	0.336192
2014	8	21	735832	0.381573	0.377086	0.378306	0.311729	0.336794
2014	8	22	735834	0.40968	0.402461	0.405468	0.313601	0.337805
2014	8	23	735834	0.404202	0.398549	0.39888	0.31525	0.338699
2014	8	24	735836	0.377353	0.373276	0.371734	0.316103	0.33916
2014	8	25	735836	0.348093	0.355451	0.348684	0.316292	0.339259
2014	8	26	735838	0.40561	0.390696	0.403442	0.318015	0.340199
2014	8	27	735838	0.398619	0.400552	0.395882	0.319491	0.341007
2014	8	28	735840	0.375229	0.373597	0.371708	0.320258	0.341431
2014	8	29	735840	0.379123	0.373164	0.377408	0.32117	0.341936
2014	8	30	735842	0.418936	0.412856	0.418818	0.323227	0.343068
2014	8	31	735842	0.401838	0.399927	0.394327	0.324555	0.343806
2014	9	1	735844	0.426538	0.41598	0.424828	0.326713	0.345001
2014	9	2	735844	0.448954	0.442867	0.440831	0.329277	0.346422
2014	9	3	735846	0.463223	0.452093	0.463248	0.332419	0.348164
2014	9	4	735846	0.429012	0.440348	0.427187	0.334486	0.349325
2014	9	5	735848	0.456173	0.452387	0.454133	0.337267	0.35088
2014	9	6	735848	0.419767	0.418743	0.417781	0.338973	0.351854
2014	9	7	735850	0.40555	0.405905	0.401429	0.340186	0.352561
2014	9	8	735850	0.401318	0.39995	0.398226	0.341285	0.353208
2014	9	9	735852	0.37678	0.378929	0.374722	0.341703	0.353485
2014	9	10	735852	0.358559	0.352122	0.354382	0.341541	0.353446
2014	9	11	735854	0.387738	0.376579	0.382163	0.342162	0.353833
2014	9	12	735854	0.396772	0.395845	0.393241	0.343082	0.354383
2014	9	13	735856	0.418425	0.409723	0.417931	0.344675	0.355302
2014	9	14	735856	0.443874	0.436392	0.439538	0.346843	0.356537
2014	9	15	735858	0.427519	0.432276	0.426725	0.348608	0.357556
2014	9	16	735858	0.435015	0.429621	0.427834	0.350368	0.358576
2014	9	17	735860	0.378175	0.379032	0.37486	0.350609	0.35877
2014	9	18	735860	0.353438	0.352289	0.350784	0.35017	0.358593
2014	9	19	735862	0.378332	0.369923	0.371994	0.350334	0.358743
2014	9	20	735862	0.362757	0.362334	0.360758	0.350179	0.358719
2014	9	21	735864	0.370127	0.367716	0.365823	0.35017	0.358773
2014	9	22	735864	0.340755	0.334201	0.33882	0.349405	0.358413
2014	9	23	735866	0.363629	0.361522	0.359752	0.349241	0.358379
2014	9	24	735866	0.345464	0.345516	0.345566	0.348683	0.358128
2014	9	25	735868	0.365967	0.360697	0.362596	0.348613	0.358142
2014	9	26	735868	0.376989	0.378182	0.376862	0.348944	0.358373
2014	9	27	735870	0.400307	0.385826	0.394176	0.349754	0.358864
2014	9	28	735870	0.413613	0.407386	0.41087	0.351015	0.359603
2014	9	29	735872	0.401495	0.405661	0.398851	0.351915	0.360146
2014	9	30	735872	0.405917	0.397406	0.399779	0.352822	0.360695
2014	10	1	735874	0.42696	0.41816	0.422442	0.354347	0.361581
2014	10	2	735874	0.397325	0.402378	0.394765	0.355065	0.362031
2014	10	3	735876	0.390036	0.382736	0.386368	0.355535	0.362346
2014	10	4	735876	0.377409	0.377876	0.374376	0.355659	0.362473
2014	10	5	735878	0.37904	0.377153	0.377042	0.355855	0.362638
2014	10	6	735878	0.352394	0.351179	0.350978	0.355317	0.362404
2014	10	7	735880	0.357122	0.359345	0.357405	0.35497	0.362272
2014	10	8	735880	0.366248	0.361577	0.362485	0.354773	0.362219
2014	10	9	735882	0.372025	0.365663	0.367248	0.354712	0.362239
2014	10	10	735882	0.349763	0.349941	0.346394	0.354069	0.361941
2014	10	11	735884	0.360484	0.355278	0.35875	0.353785	0.361837
2014	10	12	735884	0.354826	0.354435	0.35135	0.353299	0.361621
2014	10	13	735886	0.33874	0.333916	0.336704	0.352413	0.361186
2014	10	14	735886	0.369422	0.359863	0.360715	0.352216	0.361123
2014	10	15	735888	0.359275	0.363779	0.359829	0.351999	0.361048
2014	10	16	735888	0.357621	0.352083	0.354683	0.351642	0.360895
2014	10	17	735890	0.405895	0.395022	0.399204	0.352538	0.361422
2014	10	18	735890	0.413345	0.407361	0.40697	0.353634	0.362059
2014	10	19	735892	0.384289	0.378333	0.381353	0.353991	0.362296
2014	10	20	735892	0.415174	0.403544	0.416373	0.355321	0.363062
2014	10	21	735894	0.428141	0.429466	0.422525	0.356796	0.36391
2014	10	22	735894	0.385474	0.386102	0.385266	0.3572	0.364178
2014	10	23	735896	0.405512	0.396521	0.399955	0.358006	0.364665
2014	10	24	735896	0.398559	0.402536	0.399692	0.35879	0.36514
2014	10	25	735898	0.394983	0.39683	0.392194	0.359348	0.365494
2014	10	26	735898	0.393829	0.390418	0.390402	0.359844	0.365815
2014	10	27	735900	0.384015	0.379567	0.380227	0.360046	0.365976
2014	10	28	735900	0.382648	0.385359	0.382952	0.360321	0.366176
2014	10	29	735902	0.389772	0.384643	0.383388	0.360602	0.36638
2014	10	30	735902	0.359693	0.357099	0.358131	0.360171	0.366197
2014	10	31	735904	0.392322	0.388679	0.389953	0.360638	0.3665
2014	11	1	735904	0.39266	0.388665	0.392951	0.361181	0.366843
2014	11	2	735906	0.401886	0.398687	0.394793	0.361764	0.36721
2014	11	3	735906	0.408835	0.40266	0.405275	0.362628	0.367729
2014	11	4	735908	0.392832	0.396839	0.390314	0.363057	0.368014
2014	11	5	735908	0.39728	0.384413	0.395906	0.363634	0.368379
2014	11	6	735910	0.383145	0.38452	0.38013	0.363759	0.368499
2014	11	7	735910	0.405792	0.397785	0.400503	0.36445	0.368926
2014	11	8	735912	0.394591	0.393695	0.39316	0.364922	0.369234
2014	11	9	735912	0.382621	0.378337	0.379561	0.365005	0.369332
2014	11	10	735914	0.40121	0.398147	0.400323	0.365667	0.369743
2014	11	11	735914	0.381785	0.380151	0.375501	0.365621	0.369771
2014	11	12	735916	0.385053	0.385253	0.383449	0.365799	0.36992
2014	11	13	735916	0.401433	0.383695	0.391037	0.366185	0.370181
2014	11	14	735918	0.373374	0.383949	0.375341	0.366125	0.3702
2014	11	15	735918	0.375767	0.369835	0.374031	0.366029	0.370198
2014	11	16	735920	0.38734	0.388094	0.384306	0.366223	0.370353
2014	11	17	735920	0.360561	0.361555	0.359605	0.365722	0.370131
2014	11	18	735922	0.404481	0.391844	0.398619	0.366321	0.370503
2014	11	19	735922	0.361372	0.361602	0.360184	0.365835	0.370287
2014	11	20	735924	0.363431	0.364259	0.36171	0.3654	0.370098
2014	11	21	735924	0.348414	0.346828	0.345486	0.364521	0.369666
2014	11	22	735926	0.346964	0.347614	0.345466	0.363658	0.36924
2014	11	23	735926	0.333465	0.335284	0.33046	0.362393	0.368593
2014	11	24	735928	0.349184	0.341413	0.346241	0.361595	0.368196
2014	11	25	735928	0.336831	0.32809	0.333175	0.360447	0.367606
2014	11	26	735930	0.326748	0.327742	0.325359	0.359103	0.366908
2014	11	27	735930	0.348609	0.341343	0.343067	0.358281	0.366489
2014	11	28	735932	0.323769	0.323864	0.322694	0.356905	0.365768
2014	11	29	735932	0.337392	0.336407	0.334821	0.355896	0.365241
2014	11	30	735934	0.335082	0.324546	0.333486	0.35487	0.364703
2014	12	1	735934	0.347107	0.347867	0.34402	0.354158	0.364333
2014	12	2	735936	0.33217	0.332285	0.331406	0.353108	0.363777
2014	12	3	735936	0.339549	0.335266	0.335605	0.352197	0.363294
2014	12	4	735938	0.347117	0.345388	0.347037	0.351622	0.362991
2014	12	5	735938	0.357115	0.355347	0.355288	0.35129	0.362818
2014	12	6	735940	0.353523	0.353897	0.352848	0.350897	0.362611
2014	12	7	735940	0.359597	0.355738	0.357708	0.350646	0.362481
2014	12	8	735942	0.355236	0.358351	0.355981	0.350353	0.362326
2014	12	9	735942	0.369365	0.361771	0.366124	0.350349	0.362328
2014	12	10	735944	0.353945	0.357883	0.352971	0.349977	0.36213
2014	12	11	735944	0.383053	0.370563	0.37668	0.350275	0.362295
2014	12	12	735946	0.369032	0.370524	0.367457	0.35031	0.362317
2014	12	13	735946	0.364807	0.365173	0.362649	0.35021	0.362266
2014	12	14	735948	0.361459	0.35726	0.359064	0.350011	0.362162
2014	12	15	735948	0.381102	0.376202	0.376453	0.350302	0.362322
2014	12	16	735950	0.386189	0.381297	0.385932	0.350853	0.362623
2014	12	17	735950	0.403326	0.399533	0.39623	0.35168	0.363076
2014	12	18	735952	0.384792	0.381039	0.384213	0.352155	0.363339
2014	12	19	735952	0.421821	0.41156	0.414489	0.353467	0.364057
2014	12	20	735954	0.383131	0.382681	0.377956	0.353732	0.364211
2014	12	21	735954	0.391158	0.387976	0.39005	0.354329	0.364545
2014	12	22	735956	0.372687	0.369527	0.366936	0.354269	0.364524
2014	12	23	735956	0.340996	0.340424	0.338443	0.353414	0.364073
2014	12	24	735958	0.342311	0.336675	0.336762	0.352528	0.363603
2014	12	25	735958	0.33618	0.335139	0.335556	0.351627	0.363122
2014	12	26	735960	0.36	0.351845	0.352947	0.351229	0.362912
2014	12	27	735960	0.350898	0.347245	0.34968	0.350748	0.362656
2014	12	28	735962	0.347661	0.353651	0.349065	0.35026	0.362394
2014	12	29	735962	0.345273	0.336315	0.34043	0.34954	0.362006
2014	12	30	735964	0.373557	0.366675	0.368984	0.349631	0.362056
2014	12	31	735964	0.389812	0.385484	0.384283	0.350149	0.362336
2015	1	1	735966	0.409035	0.396586	0.403845	0.351203	0.362908
2015	1	2	735966	0.423686	0.422407	0.421813	0.352738	0.363743
2015	1	3	735968	0.395479	0.392605	0.393019	0.353438	0.364129
2015	1	4	735968	0.415444	0.408433	0.4077	0.354534	0.364731
2015	1	5	735970	0.394803	0.395868	0.393095	0.355201	0.365103
2015	1	6	735970	0.396272	0.39228	0.392313	0.355832	0.365458
2015	1	7	735972	0.385974	0.375829	0.380789	0.356129	0.365632
2015	1	8	735972	0.383193	0.388775	0.377571	0.356331	0.365755
2015	1	9	735974	0.365319	0.355279	0.362116	0.356096	0.365643
2015	1	10	735974	0.410011	0.403665	0.408614	0.357165	0.366235
2015	1	11	735976	0.373744	0.383737	0.373353	0.357228	0.366286
2015	1	12	735976	0.356464	0.351022	0.351139	0.356669	0.365999
2015	1	13	735978	0.357884	0.351898	0.354326	0.35621	0.365765
2015	1	14	735978	0.38278	0.369149	0.37396	0.356309	0.365832
2015	1	15	735980	0.3914	0.39413	0.39352	0.356952	0.366193
2015	1	16	735980	0.404636	0.399492	0.398712	0.357728	0.366627
2015	1	17	735982	0.385009	0.380066	0.383753	0.35807	0.366828
2015	1	18	735982	0.395178	0.389851	0.386573	0.358484	0.367069
2015	1	19	735984	0.410269	0.408458	0.408751	0.35951	0.367641
2015	1	20	735984	0.388694	0.386102	0.387154	0.359912	0.367878
2015	1	21	735986	0.360006	0.357975	0.354852	0.359404	0.367623
2015	1	22	735986	0.387196	0.380016	0.384659	0.359738	0.367822
2015	1	23	735988	0.392013	0.386545	0.388311	0.360168	0.368074
2015	1	24	735988	0.366396	0.370492	0.366313	0.359975	0.367989
2015	1	25	735990	0.388301	0.380849	0.385066	0.360309	0.368189
2015	1	26	735990	0.369905	0.370785	0.36553	0.360091	0.36809
2015	1	27	735992	0.394179	0.384071	0.389012	0.360533	0.368348
2015	1	28	735992	0.424523	0.421217	0.41693	0.361747	0.369024
2015	1	29	735994	0.382586	0.377476	0.381857	0.361957	0.369159
2015	1	30	735994	0.416787	0.405932	0.411658	0.362995	0.369742
2015	1	31	735996	0.419601	0.414456	0.418311	0.364198	0.370417
2015	2	1	735996	0.45691	0.453775	0.449902	0.36626	0.371559
2015	2	2	735998	0.442348	0.424546	0.43057	0.367741	0.372391
2015	2	3	735998	0.424639	0.432845	0.426602	0.369082	0.37315
2015	2	4	736000	0.421069	0.4131	0.416703	0.37012	0.373748
2015	2	5	736000	0.384759	0.385184	0.38085	0.370135	0.373794
2015	2	6	736002	0.382019	0.389457	0.378617	0.370088	0.373806
2015	2	7	736002	0.383952	0.373934	0.379065	0.370055	0.373825
2015	2	8	736004	0.40454	0.391899	0.400195	0.370612	0.374163
2015	2	9	736004	0.4633	0.438247	0.452268	0.372613	0.375282
2015	2	10	736006	0.519561	0.536375	0.536094	0.376916	0.37765
2015	2	11	736006	0.488174	0.494381	0.487872	0.379787	0.379253
2015	2	12	736008	0.46011	0.455365	0.459485	0.381807	0.380402
2015	2	13	736008	0.464171	0.466505	0.457733	0.383739	0.381507
2015	2	14	736010	0.43691	0.43532	0.43592	0.385023	0.382265
2015	2	15	736010	0.45706	0.455806	0.456036	0.386844	0.383315
2015	2	16	736012	0.401031	0.398512	0.397302	0.386988	0.383461
2015	2	17	736012	0.369434	0.375492	0.366945	0.386281	0.383147
2015	2	18	736014	0.37327	0.368469	0.369412	0.385658	0.382875
2015	2	19	736014	0.350561	0.349852	0.349204	0.384482	0.382302
2015	2	20	736016	0.381379	0.36478	0.370399	0.383921	0.382058
2015	2	21	736016	0.346643	0.346973	0.347067	0.38272	0.381466
2015	2	22	736018	0.397382	0.383649	0.388547	0.382701	0.381509
2015	2	23	736018	0.42269	0.405819	0.413306	0.383374	0.381925
2015	2	24	736020	0.414535	0.417299	0.408508	0.3839	0.382263
2015	2	25	736020	0.386335	0.379007	0.382194	0.38368	0.382198
2015	2	26	736022	0.389699	0.389757	0.387083	0.383601	0.382207
2015	2	27	736022	0.381741	0.380401	0.376778	0.383236	0.382061
2015	2	28	736024	0.362484	0.365091	0.3646	0.382538	0.381733
2015	3	1	736024	0.375294	0.361108	0.368406	0.381961	0.381468
2015	3	2	736026	0.398667	0.402622	0.395181	0.382142	0.381611
2015	3	3	736026	0.351413	0.35257	0.347437	0.380986	0.381031
2015	3	4	736028	0.355687	0.345002	0.348043	0.379871	0.38047
2015	3	5	736028	0.346345	0.346623	0.345377	0.378702	0.379876
2015	3	6	736030	0.34861	0.333524	0.338427	0.377363	0.379187
2015	3	7	736030	0.323578	0.323482	0.322939	0.375618	0.378275
2015	3	8	736032	0.33197	0.332444	0.330435	0.374117	0.37749
2015	3	9	736032	0.342995	0.336308	0.33835	0.372866	0.376837
2015	3	10	736034	0.352357	0.349727	0.349106	0.371941	0.376357
2015	3	11	736034	0.341479	0.338521	0.335736	0.37066	0.375682
2015	3	12	736036	0.342591	0.3353	0.340128	0.369528	0.375083
2015	3	13	736036	0.3615	0.355115	0.357152	0.368893	0.374751
2015	3	14	736038	0.361939	0.35998	0.357478	0.368281	0.37443
2015	3	15	736038	0.327125	0.330263	0.325066	0.366775	0.373623
2015	3	16	736040	0.315472	0.312999	0.314316	0.364998	0.372668
2015	3	17	736040	0.317974	0.31411	0.314485	0.363262	0.371729
2015	3	18	736042	0.302856	0.304298	0.300838	0.361179	0.370599
2015	3	19	736042	0.313422	0.308649	0.31048	0.359406	0.369632
2015	3	20	736044	0.291107	0.288408	0.288422	0.357052	0.368347
2015	3	21	736044	0.295611	0.293264	0.294483	0.354914	0.367174
2015	3	22	736046	0.320757	0.319039	0.318226	0.353482	0.366377
2015	3	23	736046	0.297484	0.300687	0.296247	0.351464	0.365261
2015	3	24	736048	0.30962	0.303354	0.308018	0.349815	0.36434
2015	3	25	736048	0.340351	0.3267	0.337098	0.349011	0.363872
2015	3	26	736050	0.328317	0.334836	0.327273	0.347948	0.363263
2015	3	27	736050	0.326068	0.324218	0.324161	0.34682	0.362616
2015	3	28	736052	0.304139	0.307784	0.303428	0.345135	0.361667
2015	3	29	736052	0.31619	0.303224	0.311802	0.343717	0.360859
2015	3	30	736054	0.356375	0.349265	0.350549	0.343409	0.360648
2015	3	31	736054	0.355512	0.350469	0.350766	0.343113	0.360443
2015	4	1	736056	0.36101	0.357573	0.358492	0.343039	0.360359
2015	4	2	736056	0.386112	0.378904	0.379666	0.343558	0.360595
2015	4	3	736058	0.369761	0.363607	0.365934	0.343683	0.360621
2015	4	4	736058	0.334274	0.340644	0.33269	0.342878	0.360144
2015	4	5	736060	0.348976	0.343609	0.345149	0.342436	0.359863
2015	4	6	736060	0.321013	0.322311	0.317046	0.341218	0.359162
2015	4	7	736062	0.295274	0.2936	0.295363	0.339418	0.358144
2015	4	8	736062	0.336723	0.32492	0.33285	0.338701	0.357709
2015	4	9	736064	0.325468	0.326956	0.322995	0.337723	0.357131
2015	4	10	736064	0.301785	0.302965	0.3001	0.336125	0.356216
2015	4	11	736066	0.309341	0.302616	0.306616	0.334741	0.355414
2015	4	12	736066	0.318199	0.312093	0.314158	0.333594	0.354739
2015	4	13	736068	0.300113	0.305722	0.301148	0.332107	0.353877
2015	4	14	736068	0.274659	0.27994	0.274104	0.329894	0.352621
2015	4	15	736070	0.287294	0.282443	0.284419	0.328013	0.35154
2015	4	16	736070	0.29112	0.289426	0.291312	0.326362	0.35058
2015	4	17	736072	0.332496	0.316444	0.329137	0.3258	0.350205
2015	4	18	736072	0.336653	0.336748	0.333773	0.325379	0.349906
2015	4	19	736074	0.332121	0.328579	0.329301	0.324841	0.349545
2015	4	20	736074	0.324573	0.326304	0.323919	0.324163	0.349107
2015	4	21	736076	0.315735	0.315861	0.310747	0.323131	0.348478
2015	4	22	736076	0.300947	0.300117	0.299205	0.321797	0.347685
2015	4	23	736078	0.326415	0.321952	0.324485	0.321195	0.347285
2015	4	24	736078	0.301423	0.302195	0.299262	0.319901	0.34651
2015	4	25	736080	0.300621	0.292907	0.295287	0.318521	0.345688
2015	4	26	736080	0.311981	0.308667	0.309416	0.317564	0.345092
2015	4	27	736082	0.300537	0.297703	0.296228	0.316257	0.344306
2015	4	28	736082	0.280753	0.284709	0.282294	0.314587	0.343322
2015	4	29	736084	0.267019	0.270073	0.26548	0.31248	0.342099
2015	4	30	736084	0.290952	0.278427	0.285635	0.310978	0.3412
2015	5	1	736086	0.292678	0.289541	0.294174	0.309744	0.340443
2015	5	2	736086	0.35142	0.34207	0.344878	0.30995	0.340463
2015	5	3	736088	0.359989	0.349665	0.356456	0.310476	0.340658
2015	5	4	736088	0.385271	0.377048	0.379659	0.31164	0.3412
2015	5	5	736090	0.377639	0.38088	0.376021	0.312679	0.341678
2015	5	6	736090	0.370673	0.364723	0.369166	0.313506	0.342046
2015	5	7	736092	0.369613	0.362823	0.359134	0.314036	0.342257
2015	5	8	736092	0.337391	0.344579	0.338682	0.313984	0.342155
2015	5	9	736094	0.352056	0.337314	0.342166	0.314031	0.342108
2015	5	10	736094	0.294536	0.305175	0.293014	0.312705	0.34132
2015	5	11	736096	0.271578	0.268369	0.26929	0.310741	0.340186
2015	5	12	736096	0.264316	0.26167	0.260922	0.308584	0.338943
2015	5	13	736098	0.294648	0.288874	0.294528	0.307407	0.338227
2015	5	14	736098	0.32454	0.319513	0.319719	0.306957	0.337902
2015	5	15	736100	0.312366	0.314419	0.312773	0.306322	0.337477
2015	5	16	736100	0.292955	0.288506	0.290996	0.305092	0.33673
2015	5	17	736102	0.29954	0.29881	0.296517	0.30404	0.336078
2015	5	18	736102	0.286859	0.283057	0.286226	0.302722	0.335281
2015	5	19	736104	0.291001	0.288956	0.290209	0.30154	0.334557
2015	5	20	736104	0.32864	0.320339	0.324732	0.301347	0.334364
2015	5	21	736106	0.334169	0.337261	0.335455	0.301457	0.334337
2015	5	22	736106	0.366136	0.353728	0.361046	0.302279	0.334695
2015	5	23	736108	0.399123	0.38077	0.397401	0.3041	0.335597
2015	5	24	736108	0.425359	0.425291	0.417536	0.306448	0.336789
2015	5	25	736110	0.390005	0.397603	0.389367	0.307962	0.337538
2015	5	26	736110	0.396163	0.395774	0.394283	0.309584	0.338348
2015	5	27	736112	0.356991	0.356888	0.354409	0.31006	0.338545
2015	5	28	736112	0.343921	0.341954	0.343726	0.310228	0.338577
2015	5	29	736114	0.361263	0.349012	0.360542	0.310863	0.338863
2015	5	30	736114	0.367506	0.371068	0.361182	0.311502	0.339154
2015	5	31	736116	0.327715	0.333329	0.328479	0.311216	0.338947
2015	6	1	736116	0.327648	0.325085	0.324134	0.310814	0.338677
2015	6	2	736118	0.295883	0.303367	0.296268	0.309642	0.337991
2015	6	3	736118	0.312941	0.29735	0.307706	0.308813	0.337489
2015	6	4	736120	0.298145	0.300889	0.297147	0.307705	0.336834
2015	6	5	736120	0.285691	0.284298	0.284567	0.306267	0.336001
2015	6	6	736122	0.298804	0.289154	0.295943	0.305176	0.335351
2015	6	7	736122	0.287669	0.286494	0.285775	0.303823	0.334559
2015	6	8	736124	0.321113	0.312233	0.318625	0.303413	0.334274
2015	6	9	736124	0.331608	0.331711	0.32872	0.303294	0.334146
2015	6	10	736126	0.305128	0.309205	0.303847	0.302482	0.333645
2015	6	11	736126	0.302657	0.303275	0.298745	0.301544	0.333075
2015	6	12	736128	0.286879	0.288852	0.286165	0.300274	0.332323
2015	6	13	736128	0.298504	0.282568	0.296892	0.299328	0.331746
2015	6	14	736130	0.325869	0.331339	0.322413	0.299113	0.331562
2015	6	15	736130	0.312638	0.310253	0.312912	0.298638	0.331237
2015	6	16	736132	0.303607	0.300423	0.298938	0.297781	0.330707
2015	6	17	736132	0.276935	0.278052	0.277516	0.296343	0.329862
2015	6	18	736134	0.284976	0.28069	0.283299	0.295095	0.329117
2015	6	19	736134	0.324664	0.318031	0.322199	0.294959	0.328971
2015	6	20	736136	0.338836	0.335343	0.335095	0.295185	0.329022
2015	6	21	736136	0.326537	0.323839	0.322082	0.295043	0.328875
2015	6	22	736138	0.349397	0.340849	0.349249	0.295663	0.329141
2015	6	23	736138	0.34425	0.345581	0.341782	0.296062	0.32929
2015	6	24	736140	0.349052	0.348694	0.346262	0.296578	0.329504
2015	6	25	736140	0.32657	0.325072	0.325779	0.296512	0.329405
2015	6	26	736142	0.3252	0.323472	0.323687	0.296389	0.329277
2015	6	27	736142	0.317942	0.314423	0.315742	0.296046	0.329031
2015	6	28	736144	0.335704	0.332345	0.333369	0.296203	0.329054
2015	6	29	736144	0.324371	0.326683	0.323995	0.296094	0.328936
2015	6	30	736146	0.328435	0.326458	0.326273	0.296052	0.328854
2015	7	1	736146	0.330144	0.322117	0.32586	0.295998	0.328767
2015	7	2	736148	0.304518	0.311827	0.304585	0.295352	0.328361
2015	7	3	736148	0.317136	0.309125	0.313322	0.294962	0.328092
2015	7	4	736150	0.29843	0.30301	0.298255	0.294159	0.3276
2015	7	5	736150	0.28476	0.282352	0.282779	0.29294	0.326883
2015	7	6	736152	0.294281	0.294259	0.294095	0.292061	0.326347
2015	7	7	736152	0.308612	0.303606	0.306836	0.291556	0.326012
2015	7	8	736154	0.301876	0.293101	0.299737	0.290862	0.325575
2015	7	9	736154	0.32988	0.328582	0.325771	0.290909	0.325538
2015	7	10	736156	0.316282	0.318579	0.313645	0.290616	0.325318
2015	7	11	736156	0.297876	0.287149	0.293531	0.289767	0.324798
2015	7	12	736158	0.295779	0.300585	0.294444	0.288961	0.3243
2015	7	13	736158	0.300311	0.288233	0.29593	0.288212	0.323832
2015	7	14	736160	0.331337	0.328638	0.327485	0.288359	0.323847
2015	7	15	736160	0.311498	0.312063	0.311085	0.288046	0.323615
2015	7	16	736162	0.288106	0.284573	0.284371	0.286992	0.322983
2015	7	17	736162	0.278455	0.27981	0.278124	0.285785	0.322267
2015	7	18	736164	0.273879	0.275417	0.273179	0.284464	0.321488
2015	7	19	736164	0.277768	0.266767	0.270461	0.283092	0.320679
2015	7	20	736166	0.330937	0.322581	0.326716	0.28332	0.320732
2015	7	21	736166	0.274335	0.286409	0.27602	0.282126	0.320019
2015	7	22	736168	0.250356	0.247905	0.247435	0.280159	0.318885
2015	7	23	736168	0.271459	0.263043	0.265908	0.278746	0.318049
2015	7	24	736170	0.259474	0.26546	0.259321	0.277177	0.317125
2015	7	25	736170	0.242804	0.235569	0.238735	0.275064	0.315906
2015	7	26	736172	0.213722	0.220703	0.212916	0.272272	0.314315
2015	7	27	736172	0.240903	0.229596	0.238422	0.270247	0.313135
2015	7	28	736174	0.242546	0.242862	0.238472	0.268264	0.311973
2015	7	29	736174	0.263712	0.256779	0.262993	0.267005	0.311199
2015	7	30	736176	0.254714	0.251353	0.250796	0.265431	0.310254
2015	7	31	736176	0.225648	0.230052	0.225098	0.26317	0.308935
2015	8	1	736178	0.21483	0.212138	0.212562	0.260603	0.307447
2015	8	2	736178	0.247566	0.239082	0.24526	0.259001	0.306476
2015	8	3	736180	0.258554	0.253643	0.256596	0.257747	0.305691
2015	8	4	736180	0.235958	0.241822	0.231949	0.255829	0.304547
2015	8	5	736182	0.222	0.219762	0.22244	0.253684	0.303276
2015	8	6	736182	0.202423	0.205687	0.201072	0.250984	0.301703
2015	8	7	736184	0.22127	0.214902	0.217802	0.248806	0.300407
2015	8	8	736184	0.212206	0.208352	0.211151	0.246484	0.29903
2015	8	9	736186	0.198004	0.20063	0.196712	0.243806	0.297457
2015	8	10	736186	0.179327	0.179712	0.178125	0.240661	0.295628
2015	8	11	736188	0.171809	0.172576	0.169777	0.237345	0.293702
2015	8	12	736188	0.170338	0.16951	0.169921	0.234099	0.291807
2015	8	13	736190	0.182835	0.180777	0.179865	0.231195	0.290092
2015	8	14	736190	0.161653	0.160368	0.162174	0.227855	0.288136
2015	8	15	736192	0.1766	0.174377	0.175108	0.224942	0.286406
2015	8	16	736192	0.19216	0.185097	0.19206	0.22256	0.284959
2015	8	17	736194	0.347804	0.319177	0.340731	0.224377	0.285777
2015	8	18	736194	0.293846	0.300604	0.292383	0.224808	0.285853
2015	8	19	736196	0.297239	0.298394	0.297929	0.225385	0.286011
2015	8	20	736196	0.318462	0.310187	0.312961	0.226371	0.286394
2015	8	21	736198	0.340348	0.340152	0.339601	0.228081	0.287172
2015	8	22	736198	0.289545	0.296471	0.286051	0.228262	0.287131
2015	8	23	736200	0.277448	0.270429	0.276213	0.228164	0.286942
2015	8	24	736200	0.27684	0.275262	0.27534	0.228044	0.286743
2015	8	25	736202	0.245429	0.251216	0.24146	0.22698	0.286035
2015	8	26	736202	0.244156	0.23883	0.24266	0.225971	0.285357
2015	8	27	736204	0.244792	0.241935	0.24274	0.224984	0.28469
2015	8	28	736204	0.244475	0.24725	0.242801	0.224018	0.284035
2015	8	29	736206	0.234983	0.232648	0.234757	0.222847	0.283269
2015	8	30	736206	0.216506	0.216332	0.2137	0.221111	0.282196
2015	8	31	736208	0.219391	0.214383	0.215872	0.219469	0.281173
2015	9	1	736208	0.209403	0.208382	0.208092	0.217644	0.280049
2015	9	2	736210	0.220441	0.212862	0.21869	0.21615	0.279102
2015	9	3	736210	0.255939	0.243791	0.2526	0.215633	0.278681
2015	9	4	736212	0.338547	0.327228	0.334667	0.217418	0.279505
2015	9	5	736212	0.302345	0.311677	0.300584	0.218215	0.279802
2015	9	6	736214	0.299068	0.295583	0.293429	0.218797	0.279986
2015	9	7	736214	0.300592	0.292161	0.299251	0.219531	0.280255
2015	9	8	736216	0.284397	0.290357	0.282881	0.219792	0.280273
2015	9	9	736216	0.294365	0.287488	0.290894	0.220272	0.280412
2015	9	10	736218	0.262687	0.26595	0.260454	0.219893	0.280089
2015	9	11	736218	0.28567	0.274154	0.282177	0.220128	0.2801
2015	9	12	736220	0.262982	0.266799	0.261314	0.219775	0.279795
2015	9	13	736220	0.253384	0.25295	0.250371	0.219124	0.27933
2015	9	14	736222	0.273459	0.264837	0.26802	0.218978	0.279138
2015	9	15	736222	0.281528	0.276734	0.279676	0.219161	0.279125
2015	9	16	736224	0.276809	0.275177	0.276983	0.219265	0.279072
2015	9	17	736224	0.266779	0.268803	0.26217	0.218954	0.278796
2015	9	18	736226	0.263253	0.257344	0.260546	0.218603	0.278499
2015	9	19	736226	0.26525	0.264543	0.260522	0.218258	0.278207
2015	9	20	736228	0.254259	0.252958	0.251137	0.217659	0.277778
2015	9	21	736228	0.223049	0.220158	0.222189	0.216262	0.276919
2015	9	22	736230	0.225178	0.220736	0.221895	0.214885	0.276069
2015	9	23	736230	0.228958	0.229787	0.228634	0.213724	0.275334
2015	9	24	736232	0.287852	0.277319	0.284456	0.214144	0.275452
2015	9	25	736232	0.268856	0.270176	0.266974	0.214068	0.275305
2015	9	26	736234	0.272027	0.270643	0.270133	0.214082	0.275207
2015	9	27	736234	0.246367	0.245034	0.243216	0.213344	0.274705
2015	9	28	736236	0.247536	0.242298	0.243294	0.212622	0.274212
2015	9	29	736236	0.233024	0.23544	0.2333	0.211636	0.273576
2015	9	30	736238	0.220829	0.223684	0.219334	0.210279	0.272739
2015	10	1	736238	0.209947	0.204968	0.206558	0.208592	0.271722
2015	10	2	736240	0.219641	0.212498	0.214888	0.207171	0.270847
2015	10	3	736240	0.204618	0.207082	0.205285	0.205511	0.26984
2015	10	4	736242	0.227846	0.221029	0.224934	0.204431	0.269145
2015	10	5	736242	0.214257	0.214805	0.212243	0.203019	0.26827
2015	10	6	736244	0.237746	0.229284	0.234029	0.202243	0.267737
2015	10	7	736244	0.287172	0.27955	0.289022	0.203019	0.268042
2015	10	8	736246	0.380356	0.365157	0.375334	0.206189	0.269644
2015	10	9	736246	0.371761	0.374842	0.369693	0.209139	0.271136
2015	10	10	736248	0.349681	0.347165	0.346324	0.211378	0.272253
2015	10	11	736248	0.32911	0.326559	0.324357	0.21296	0.273021
2015	10	12	736250	0.341983	0.336156	0.337791	0.214885	0.27398
2015	10	13	736250	0.327037	0.327017	0.327119	0.216474	0.274763
2015	10	14	736252	0.372385	0.356837	0.365757	0.219111	0.276116
2015	10	15	736252	0.385905	0.384943	0.381325	0.22213	0.277684
2015	10	16	736254	0.369013	0.365269	0.36603	0.224662	0.278996
2015	10	17	736254	0.355235	0.352636	0.351017	0.226725	0.280062
2015	10	18	736256	0.343747	0.34199	0.340278	0.228447	0.280949
2015	10	19	736256	0.358885	0.35263	0.357121	0.230605	0.282076
2015	10	20	736258	0.377372	0.373179	0.372138	0.23314	0.283412
2015	10	21	736258	0.379679	0.367433	0.374525	0.235692	0.284764
2015	10	22	736260	0.37074	0.37553	0.365653	0.237945	0.285961
2015	10	23	736260	0.365105	0.360983	0.361887	0.240048	0.287083
2015	10	24	736262	0.338355	0.341719	0.33556	0.241375	0.28779
2015	10	25	736262	0.363612	0.350019	0.356821	0.243268	0.288806
2015	10	26	736264	0.355381	0.356466	0.352698	0.24501	0.289745
2015	10	27	736264	0.369136	0.35614	0.36696	0.247115	0.290885
2015	10	28	736266	0.324847	0.329063	0.322561	0.247938	0.291337
2015	10	29	736266	0.353894	0.348553	0.34764	0.249446	0.29216
2015	10	30	736268	0.324914	0.327635	0.32338	0.250246	0.292604
2015	10	31	736268	0.315433	0.315694	0.312996	0.250741	0.292885
2015	11	1	736270	0.307147	0.303261	0.30258	0.250934	0.293005
2015	11	2	736270	0.275914	0.275039	0.272683	0.250289	0.292672
2015	11	3	736272	0.307821	0.305577	0.308019	0.250644	0.292876
2015	11	4	736272	0.311069	0.302147	0.304752	0.2509	0.293029
2015	11	5	736274	0.336132	0.326963	0.334279	0.251976	0.293624
2015	11	6	736274	0.298764	0.306883	0.300349	0.252083	0.293699
2015	11	7	736276	0.350067	0.335132	0.343464	0.253392	0.294422
2015	11	8	736276	0.361708	0.361688	0.358447	0.255093	0.295361
2015	11	9	736278	0.337684	0.3312	0.334854	0.256102	0.295929
2015	11	10	736278	0.369935	0.36304	0.360499	0.257807	0.296875
2015	11	11	736280	0.340267	0.332624	0.337717	0.258842	0.297463
2015	11	12	736280	0.338015	0.339885	0.332804	0.259719	0.297967
2015	11	13	736282	0.302614	0.30367	0.301455	0.259704	0.297991
2015	11	14	736282	0.306023	0.303143	0.30347	0.259745	0.298045
2015	11	15	736284	0.355141	0.335604	0.348811	0.261051	0.298782
2015	11	16	736284	0.368686	0.36683	0.361211	0.262678	0.299694
2015	11	17	736286	0.358267	0.345867	0.35423	0.264078	0.300487
2015	11	18	736286	0.34417	0.348227	0.341388	0.265091	0.301074
2015	11	19	736288	0.355126	0.348498	0.351491	0.266367	0.301805
2015	11	20	736288	0.361088	0.357876	0.359895	0.267852	0.302651
2015	11	21	736290	0.385828	0.3801	0.378097	0.269816	0.303758
2015	11	22	736290	0.370857	0.369724	0.369947	0.271513	0.304725
2015	11	23	736292	0.348149	0.344058	0.343551	0.27244	0.305279
2015	11	24	736292	0.35074	0.35172	0.347383	0.273455	0.305883
2015	11	25	736294	0.339846	0.329507	0.331433	0.274005	0.306236
2015	11	26	736294	0.408804	0.398559	0.409844	0.276733	0.307766
2015	11	27	736296	0.382189	0.38302	0.37657	0.278479	0.308772
2015	11	28	736296	0.378803	0.375377	0.37491	0.280143	0.309736
2015	11	29	736298	0.361995	0.357657	0.357941	0.281301	0.310429
2015	11	30	736298	0.397258	0.387163	0.394165	0.283447	0.311658
2015	12	1	736300	0.433179	0.421273	0.428033	0.286497	0.313379
2015	12	2	736300	0.395232	0.401568	0.390668	0.288442	0.31451
2015	12	3	736302	0.365289	0.369038	0.363118	0.28958	0.315208
2015	12	4	736302	0.364869	0.346543	0.35338	0.290424	0.315747
2015	12	5	736304	0.375963	0.373159	0.374199	0.291832	0.316593
2015	12	6	736304	0.386261	0.383915	0.381536	0.293417	0.317536
2015	12	7	736306	0.371041	0.362273	0.364304	0.294489	0.318205
2015	12	8	736306	0.343439	0.346338	0.338613	0.294823	0.318475
2015	12	9	736308	0.360721	0.347195	0.357012	0.295664	0.319019
2015	12	10	736308	0.341091	0.347105	0.338949	0.295984	0.319282
2015	12	11	736310	0.358095	0.34976	0.352027	0.296662	0.319738
2015	12	12	736310	0.359708	0.349483	0.3545	0.297397	0.320225
2015	12	13	736312	0.363719	0.358166	0.359947	0.298269	0.320786
2015	12	14	736312	0.37679	0.375335	0.371134	0.299436	0.321507
2015	12	15	736314	0.356207	0.357976	0.355003	0.300129	0.321973
2015	12	16	736314	0.339542	0.335041	0.33592	0.300276	0.322145
2015	12	17	736316	0.392545	0.374031	0.385148	0.301795	0.323056
2015	12	18	736316	0.38298	0.386452	0.380787	0.303162	0.323888
2015	12	19	736318	0.392043	0.383043	0.38259	0.304552	0.324734
2015	12	20	736318	0.362943	0.364549	0.362372	0.30535	0.325262
2015	12	21	736320	0.364066	0.358115	0.35779	0.306004	0.325712
2015	12	22	736320	0.3767	0.37323	0.374609	0.307115	0.326409
2015	12	23	736322	0.360434	0.356802	0.356363	0.307695	0.32682
2015	12	24	736322	0.372808	0.369986	0.370177	0.308648	0.327433
2015	12	25	736324	0.365272	0.361017	0.358784	0.309265	0.327865
2015	12	26	736324	0.351197	0.343293	0.344661	0.309475	0.328077
2015	12	27	736326	0.349114	0.348311	0.345662	0.309709	0.328301
2015	12	28	736326	0.347169	0.341801	0.345311	0.309928	0.328516
2015	12	29	736328	0.359632	0.350688	0.352017	0.310331	0.328829
2015	12	30	736328	0.31832	0.323286	0.315903	0.309716	0.328592
2015	12	31	736330	0.306461	0.302758	0.305006	0.30881	0.328195
2016	1	1	736330	0.345262	0.33421	0.342577	0.308971	0.32837
2016	1	2	736332	0.337137	0.339592	0.329918	0.308775	0.328352
2016	1	3	736332	0.32462	0.321818	0.325641	0.308464	0.328269
2016	1	4	736334	0.371741	0.35495	0.366234	0.309292	0.328801
2016	1	5	736334	0.39479	0.39361	0.389407	0.310751	0.329673
2016	1	6	736336	0.386223	0.385687	0.386061	0.312088	0.330482
2016	1	7	736336	0.409717	0.393952	0.400238	0.313794	0.331492
2016	1	8	736338	0.397373	0.400952	0.397967	0.315403	0.332452
2016	1	9	736338	0.393519	0.38973	0.388557	0.316718	0.333255
2016	1	10	736340	0.426054	0.419262	0.420924	0.31891	0.334534
2016	1	11	736340	0.426082	0.42073	0.424524	0.321159	0.335847
2016	1	12	736342	0.414923	0.409293	0.408025	0.322904	0.336891
2016	1	13	736342	0.386099	0.382795	0.380637	0.323848	0.337506
2016	1	14	736344	0.370985	0.368852	0.365021	0.324338	0.337876
2016	1	15	736344	0.372241	0.365787	0.370902	0.324983	0.338328
2016	1	16	736346	0.358499	0.364735	0.356133	0.325202	0.338551
2016	1	17	736346	0.364642	0.359937	0.364444	0.325649	0.338896
2016	1	18	736348	0.405556	0.396676	0.400003	0.32708	0.339772
2016	1	19	736348	0.405741	0.388426	0.398273	0.328434	0.340608
2016	1	20	736350	0.413416	0.415735	0.409844	0.330085	0.341606
2016	1	21	736350	0.430754	0.419448	0.425873	0.332151	0.34283
2016	1	22	736352	0.400846	0.405278	0.396693	0.333361	0.343595
2016	1	23	736352	0.444878	0.424848	0.444293	0.335877	0.345066
2016	1	24	736354	0.509755	0.518126	0.508674	0.34014	0.347486
2016	1	25	736354	0.491219	0.489721	0.487578	0.34373	0.34955
2016	1	26	736356	0.402697	0.408399	0.399247	0.344782	0.350249
2016	1	27	736356	0.384687	0.377378	0.381548	0.345319	0.35067
2016	1	28	736358	0.406806	0.398064	0.401131	0.346392	0.351381
2016	1	29	736358	0.401479	0.394835	0.397674	0.347348	0.352028
2016	1	30	736360	0.395351	0.399944	0.391581	0.348114	0.352573
2016	1	31	736360	0.387783	0.380306	0.382909	0.348623	0.352979
2016	2	1	736362	0.417611	0.409076	0.411172	0.349911	0.353805
2016	2	2	736362	0.419936	0.41736	0.414377	0.351263	0.354667
2016	2	3	736364	0.391353	0.387793	0.387781	0.351846	0.355114
2016	2	4	736364	0.369587	0.369513	0.365199	0.351786	0.355213
2016	2	5	736366	0.368579	0.362177	0.365118	0.351726	0.35531
2016	2	6	736366	0.384985	0.384395	0.384755	0.352215	0.355701
2016	2	7	736368	0.368897	0.364192	0.363787	0.352108	0.35577
2016	2	8	736368	0.398532	0.388763	0.391696	0.352784	0.356259
2016	2	9	736370	0.399572	0.39355	0.397309	0.353602	0.356825
2016	2	10	736370	0.427036	0.420031	0.420098	0.355041	0.357726
2016	2	11	736372	0.410752	0.410262	0.409346	0.356151	0.358451
2016	2	12	736372	0.382805	0.380006	0.37586	0.356304	0.35866
2016	2	13	736374	0.383397	0.370855	0.376297	0.356466	0.358871
2016	2	14	736374	0.394843	0.399499	0.39877	0.357253	0.359419
2016	2	15	736376	0.417278	0.409019	0.409854	0.358333	0.360125
2016	2	16	736376	0.374938	0.374898	0.372136	0.358339	0.360252
2016	2	17	736378	0.399368	0.398228	0.39497	0.358983	0.360721
2016	2	18	736378	0.391229	0.380378	0.388563	0.359434	0.361085
2016	2	19	736380	0.386982	0.387852	0.381463	0.359679	0.361338
2016	2	20	736380	0.352496	0.350928	0.3503	0.359048	0.361116
2016	2	21	736382	0.426015	0.411475	0.416781	0.360286	0.3619
2016	2	22	736382	0.408185	0.399274	0.40229	0.361095	0.362454
2016	2	23	736384	0.394081	0.403553	0.395847	0.361709	0.362902
2016	2	24	736384	0.396078	0.383805	0.390224	0.362153	0.363258
2016	2	25	736386	0.387119	0.385265	0.382706	0.362378	0.363495
2016	2	26	736386	0.391351	0.389284	0.384626	0.362653	0.363758
2016	2	27	736388	0.382711	0.376333	0.376811	0.362703	0.363898
2016	2	28	736388	0.375266	0.369217	0.373837	0.36267	0.363992
2016	2	29	736390	0.406565	0.404172	0.400587	0.363384	0.364488
2016	3	1	736390	0.374294	0.368075	0.368461	0.363188	0.364491
2016	3	2	736392	0.355326	0.349257	0.351374	0.362517	0.364236
2016	3	3	736392	0.370372	0.368785	0.368356	0.362335	0.364242
2016	3	4	736394	0.390098	0.380107	0.38508	0.362623	0.3645
2016	3	5	736394	0.384402	0.387839	0.383037	0.362848	0.364723
2016	3	6	736396	0.389295	0.384305	0.383112	0.363071	0.364943
2016	3	7	736396	0.402927	0.389921	0.401448	0.363801	0.365437
2016	3	8	736398	0.410865	0.403317	0.399506	0.364463	0.365894
2016	3	9	736398	0.391774	0.393571	0.388944	0.364817	0.366185
2016	3	10	736400	0.370349	0.367944	0.363623	0.364457	0.366088
2016	3	11	736400	0.38014	0.373232	0.379349	0.364542	0.366231
2016	3	12	736402	0.382228	0.380916	0.380477	0.364658	0.366389
2016	3	13	736402	0.379323	0.37837	0.377402	0.364686	0.366497
2016	3	14	736404	0.372671	0.373062	0.372079	0.364564	0.366524
2016	3	15	736404	0.369308	0.368079	0.368359	0.364341	0.366494
2016	3	16	736406	0.365286	0.363055	0.363914	0.363998	0.366398
2016	3	17	736406	0.366888	0.365333	0.364991	0.363692	0.366319
2016	3	18	736408	0.370685	0.368103	0.369773	0.363526	0.366314
2016	3	19	736408	0.36989	0.367277	0.36574	0.36325	0.366248
2016	3	20	736410	0.37959	0.377955	0.378587	0.363339	0.366376
2016	3	21	736410	0.362862	0.357862	0.359409	0.36289	0.366214
2016	3	22	736412	0.368912	0.363737	0.365973	0.362633	0.366153
2016	3	23	736412	0.374901	0.377891	0.37566	0.362652	0.366239
2016	3	24	736414	0.356	0.350502	0.349064	0.361928	0.365922
2016	3	25	736414	0.364527	0.360465	0.36229	0.361588	0.36581
2016	3	26	736416	0.361426	0.353296	0.352704	0.360986	0.365555
2016	3	27	736416	0.36713	0.367349	0.364985	0.36074	0.36549
2016	3	28	736418	0.38625	0.383358	0.380651	0.360936	0.365661
2016	3	29	736418	0.352023	0.341485	0.34669	0.360179	0.365318
2016	3	30	736420	0.407023	0.389383	0.399799	0.360921	0.365781
2016	3	31	736420	0.374236	0.378841	0.371775	0.360865	0.365814
2016	4	1	736422	0.36594	0.366389	0.364234	0.3606	0.365733
2016	4	2	736422	0.339656	0.339432	0.336047	0.359553	0.365228
2016	4	3	736424	0.345182	0.336396	0.335674	0.358517	0.364725
2016	4	4	736424	0.318006	0.318416	0.31653	0.356966	0.363942
2016	4	5	736426	0.310507	0.308792	0.308281	0.355215	0.363045
2016	4	6	736426	0.311994	0.311236	0.309616	0.353537	0.362183
2016	4	7	736428	0.360088	0.343168	0.356312	0.353195	0.362039
2016	4	8	736428	0.412858	0.398992	0.410118	0.354364	0.362709
2016	4	9	736430	0.437964	0.433339	0.43346	0.356161	0.36372
2016	4	10	736430	0.405409	0.410114	0.401279	0.357023	0.36423
2016	4	11	736432	0.412714	0.410057	0.408474	0.35807	0.364841
2016	4	12	736432	0.417555	0.402674	0.409448	0.359123	0.365457
2016	4	13	736434	0.417736	0.417225	0.416679	0.360357	0.366173
2016	4	14	736434	0.414987	0.414053	0.412671	0.361455	0.366817
2016	4	15	736436	0.415338	0.41378	0.413675	0.362559	0.367466
2016	4	16	736436	0.408542	0.407856	0.407321	0.363463	0.36801
2016	4	17	736438	0.402729	0.401392	0.401938	0.3642	0.368463
2016	4	18	736438	0.421966	0.408719	0.415509	0.365301	0.369115
2016	4	19	736440	0.39594	0.403429	0.396079	0.365837	0.369463
2016	4	20	736440	0.38971	0.388934	0.389024	0.366166	0.369699
2016	4	21	736442	0.385496	0.387714	0.384361	0.366358	0.369862
2016	4	22	736442	0.366532	0.367662	0.366324	0.366042	0.369749
2016	4	23	736444	0.391072	0.379402	0.3867	0.366302	0.369946
2016	4	24	736444	0.404633	0.406536	0.40095	0.366955	0.370355
2016	4	25	736446	0.390205	0.380791	0.383053	0.367095	0.370488
2016	4	26	736446	0.378696	0.376654	0.376757	0.367056	0.370523
2016	4	27	736448	0.401618	0.395887	0.395401	0.367539	0.370839
2016	4	28	736448	0.374783	0.377315	0.374944	0.367441	0.370842
2016	4	29	736450	0.372116	0.367671	0.367276	0.36713	0.370729
2016	4	30	736450	0.359169	0.355038	0.352302	0.366408	0.370391
2016	5	1	736452	0.375689	0.362778	0.374713	0.366326	0.370397
2016	5	2	736452	0.420446	0.415169	0.416819	0.367421	0.371039
2016	5	3	736454	0.433722	0.424416	0.432865	0.368943	0.371912
2016	5	4	736454	0.457563	0.46113	0.453071	0.370999	0.373076
2016	5	5	736456	0.453619	0.444799	0.448304	0.372881	0.374151
2016	5	6	736456	0.423073	0.424528	0.41927	0.373915	0.374771
2016	5	7	736458	0.412661	0.405264	0.40268	0.374465	0.375131
2016	5	8	736458	0.366467	0.369958	0.364328	0.373934	0.374907
2016	5	9	736460	0.394608	0.381263	0.389039	0.374102	0.375059
2016	5	10	736460	0.377879	0.37997	0.377978	0.373959	0.375042
2016	5	11	736462	0.379091	0.377345	0.372458	0.373664	0.374942
2016	5	12	736462	0.397083	0.375598	0.392145	0.373925	0.375141
2016	5	13	736464	0.490611	0.491598	0.490808	0.376937	0.376824
2016	5	14	736464	0.420188	0.423629	0.41569	0.37779	0.377349
2016	5	15	736466	0.38622	0.387505	0.384471	0.377755	0.377394
2016	5	16	736466	0.408948	0.397011	0.40433	0.378276	0.377739
2016	5	17	736468	0.416286	0.411853	0.412525	0.379014	0.378201
2016	5	18	736468	0.412835	0.408787	0.411273	0.379704	0.378638
2016	5	19	736470	0.423707	0.427884	0.419637	0.380613	0.379194
2016	5	20	736470	0.417515	0.404816	0.407169	0.381156	0.379553
2016	5	21	736472	0.387917	0.377108	0.387571	0.381141	0.379611
2016	5	22	736472	0.42106	0.426056	0.412826	0.381831	0.380049
2016	5	23	736474	0.413552	0.401245	0.410526	0.382444	0.380446
2016	5	24	736474	0.454074	0.442926	0.451932	0.384201	0.381461
2016	5	25	736476	0.473258	0.474444	0.465859	0.386312	0.38267
2016	5	26	736476	0.444222	0.431802	0.433859	0.387487	0.383378
2016	5	27	736478	0.472406	0.460664	0.470313	0.389657	0.384625
2016	5	28	736478	0.48693	0.489577	0.48107	0.392085	0.386015
2016	5	29	736480	0.522122	0.529432	0.529572	0.395819	0.388115
2016	5	30	736480	0.454788	0.451521	0.451781	0.397307	0.389009
2016	5	31	736482	0.493242	0.4851	0.494764	0.399966	0.390537
2016	6	1	736482	0.463229	0.464485	0.45939	0.401584	0.391509
2016	6	2	736484	0.507561	0.502886	0.510308	0.404592	0.393233
2016	6	3	736484	0.469953	0.474021	0.468019	0.40636	0.394292
2016	6	4	736486	0.441141	0.441148	0.440301	0.407318	0.394917
2016	6	5	736486	0.480935	0.471037	0.484339	0.409487	0.396197
2016	6	6	736488	0.487811	0.488228	0.490017	0.411772	0.397542
2016	6	7	736488	0.40522	0.414002	0.395445	0.411371	0.39744
2016	6	8	736490	0.362227	0.360584	0.3629	0.410068	0.396849
2016	6	9	736490	0.448612	0.432029	0.443078	0.411031	0.397476
2016	6	10	736492	0.477249	0.468428	0.470488	0.41274	0.398507
2016	6	11	736492	0.422232	0.430321	0.421732	0.413053	0.398786
2016	6	12	736494	0.454066	0.446884	0.449643	0.41414	0.399483
2016	6	13	736494	0.435904	0.426313	0.43205	0.414714	0.399903
2016	6	14	736496	0.44426	0.443949	0.439558	0.415486	0.400429
2016	6	15	736496	0.444165	0.438002	0.439066	0.41623	0.400941
2016	6	16	736498	0.443044	0.443545	0.443058	0.41707	0.401504
2016	6	17	736498	0.373114	0.375686	0.366683	0.41576	0.400907
2016	6	18	736500	0.360096	0.352116	0.353823	0.414117	0.400125
2016	6	19	736500	0.374988	0.367629	0.370423	0.412971	0.399605
2016	6	20	736502	0.440868	0.426177	0.44129	0.413826	0.400162
2016	6	21	736502	0.410186	0.418812	0.405456	0.413663	0.400171
2016	6	22	736504	0.424413	0.415301	0.418742	0.413875	0.400379
2016	6	23	736504	0.45066	0.447312	0.44709	0.414874	0.401012
2016	6	24	736506	0.43173	0.423203	0.425044	0.415238	0.401303
2016	6	25	736506	0.411899	0.410205	0.40786	0.415114	0.40133
2016	6	26	736508	0.418303	0.409787	0.412446	0.415122	0.401425
2016	6	27	736508	0.43499	0.435733	0.435422	0.41577	0.401866
2016	6	28	736510	0.42038	0.411439	0.413699	0.415799	0.401972
2016	6	29	736510	0.424022	0.42022	0.417508	0.415934	0.402134
2016	6	30	736512	0.415135	0.415939	0.41089	0.415882	0.402194
2016	7	1	736512	0.402903	0.39908	0.400924	0.415552	0.402103
2016	7	2	736514	0.426965	0.402779	0.416892	0.415675	0.402253
2016	7	3	736514	0.419537	0.436748	0.421317	0.415919	0.402468
2016	7	4	736516	0.41139	0.389591	0.397867	0.415503	0.402327
2016	7	5	736516	0.404763	0.409305	0.401414	0.415194	0.40224
2016	7	6	736518	0.350888	0.349012	0.345538	0.413331	0.401312
2016	7	7	736518	0.317271	0.315745	0.313406	0.410607	0.399914
2016	7	8	736520	0.325646	0.319627	0.322491	0.408192	0.398675
2016	7	9	736520	0.375304	0.366793	0.373161	0.407239	0.398219
2016	7	10	736522	0.362914	0.358383	0.358474	0.405895	0.397549
2016	7	11	736522	0.380618	0.36661	0.372523	0.404969	0.397101
2016	7	12	736524	0.489988	0.466261	0.492079	0.407401	0.398463
2016	7	13	736524	0.484422	0.496688	0.487005	0.409643	0.399728
2016	7	14	736526	0.427168	0.441396	0.429008	0.410221	0.400098
2016	7	15	736526	0.416927	0.410344	0.406628	0.410163	0.400125
2016	7	16	736528	0.409595	0.402378	0.407304	0.410125	0.400162
2016	7	17	736528	0.443011	0.432889	0.436218	0.410894	0.400634
2016	7	18	736530	0.447829	0.446979	0.445155	0.411899	0.401234
2016	7	19	736530	0.418817	0.419001	0.415513	0.412055	0.401378
2016	7	20	736532	0.404552	0.397243	0.396887	0.411688	0.401238
2016	7	21	736532	0.39396	0.398465	0.393925	0.411246	0.401055
2016	7	22	736534	0.406344	0.396087	0.40281	0.411061	0.40101
2016	7	23	736534	0.449645	0.43401	0.443942	0.412028	0.401586
2016	7	24	736536	0.478809	0.476756	0.475827	0.413866	0.402634
2016	7	25	736536	0.43552	0.430903	0.430675	0.414407	0.402984
2016	7	26	736538	0.441825	0.44048	0.438616	0.415159	0.403449
2016	7	27	736538	0.442297	0.440453	0.44017	0.41594	0.40393
2016	7	28	736540	0.444932	0.439189	0.440551	0.416715	0.404409
2016	7	29	736540	0.445108	0.444986	0.441837	0.417512	0.4049
2016	7	30	736542	0.402968	0.404498	0.401145	0.417156	0.40477
2016	7	31	736542	0.41647	0.411484	0.414492	0.41718	0.404843
2016	8	1	736544	0.367256	0.374123	0.364352	0.415803	0.404159
2016	8	2	736544	0.33859	0.338016	0.338156	0.413721	0.40309
2016	8	3	736546	0.387029	0.381342	0.385405	0.413001	0.402751
2016	8	4	736546	0.379821	0.37223	0.374934	0.412002	0.402258
2016	8	5	736548	0.355865	0.351057	0.353205	0.410417	0.401446
2016	8	6	736548	0.397597	0.391127	0.395622	0.410047	0.401286
2016	8	7	736550	0.367544	0.372178	0.363268	0.408781	0.40064
2016	8	8	736550	0.358916	0.349203	0.355776	0.407331	0.399892
2016	8	9	736552	0.378653	0.379122	0.376649	0.406493	0.39947
2016	8	10	736552	0.403698	0.401398	0.40183	0.406374	0.399434
2016	8	11	736554	0.387681	0.385753	0.384189	0.405765	0.399133
2016	8	12	736554	0.367873	0.363483	0.369695	0.404763	0.398617
2016	8	13	736556	0.414567	0.40455	0.410463	0.40492	0.398725
2016	8	14	736556	0.374487	0.381911	0.372868	0.404024	0.398264
2016	8	15	736558	0.348641	0.34931	0.346385	0.402406	0.397411
2016	8	16	736558	0.345763	0.343882	0.344297	0.400761	0.396539
2016	8	17	736560	0.320299	0.322231	0.318518	0.398429	0.395292
2016	8	18	736560	0.330724	0.324867	0.328208	0.396414	0.39421
2016	8	19	736562	0.342018	0.346568	0.342313	0.394833	0.393358
2016	8	20	736562	0.339289	0.330489	0.335503	0.393093	0.392417
2016	8	21	736564	0.392023	0.379639	0.387959	0.392852	0.392281
2016	8	22	736564	0.394271	0.394382	0.39169	0.392721	0.392204
2016	8	23	736566	0.374741	0.382292	0.376409	0.392165	0.391898
2016	8	24	736566	0.341796	0.338285	0.339197	0.390581	0.391034
2016	8	25	736568	0.329144	0.332977	0.329299	0.388752	0.390035
2016	8	26	736568	0.30951	0.304855	0.305303	0.386289	0.38869
2016	8	27	736570	0.32758	0.324473	0.326215	0.384458	0.38768
2016	8	28	736570	0.340238	0.340829	0.339896	0.383046	0.386893
2016	8	29	736572	0.31129	0.310917	0.310483	0.380841	0.385674
2016	8	30	736572	0.30344	0.308663	0.301097	0.378417	0.384333
2016	8	31	736574	0.267808	0.268804	0.267536	0.375104	0.382506
2016	9	1	736574	0.289826	0.27853	0.285377	0.372355	0.380977
2016	9	2	736576	0.279975	0.285389	0.279851	0.369505	0.379387
2016	9	3	736576	0.271441	0.266434	0.269081	0.366412	0.377661
2016	9	4	736578	0.259666	0.263181	0.258808	0.363093	0.375805
2016	9	5	736578	0.314259	0.303505	0.312584	0.361341	0.37479
2016	9	6	736580	0.361189	0.351349	0.360274	0.360956	0.37451
2016	9	7	736580	0.421322	0.411314	0.421766	0.362296	0.375162
2016	9	8	736582	0.418532	0.420595	0.412908	0.363362	0.375671
2016	9	9	736582	0.376062	0.37001	0.372469	0.363277	0.375561
2016	9	10	736584	0.363523	0.370624	0.359705	0.362838	0.37526
2016	9	11	736584	0.356474	0.352471	0.356912	0.362329	0.374922
2016	9	12	736586	0.346314	0.345749	0.340402	0.36137	0.374341
2016	9	13	736586	0.32296	0.32047	0.319407	0.359843	0.373451
2016	9	14	736588	0.314059	0.314599	0.314413	0.358206	0.3725
2016	9	15	736588	0.293565	0.296335	0.293232	0.356011	0.371244
2016	9	16	736590	0.300511	0.298178	0.298846	0.354016	0.370093
2016	9	17	736590	0.362467	0.344366	0.360587	0.353785	0.36989
2016	9	18	736592	0.382865	0.387941	0.380646	0.354118	0.369994
2016	9	19	736592	0.3575	0.353772	0.356276	0.353764	0.369728
2016	9	20	736594	0.368314	0.367338	0.36803	0.353746	0.369643
2016	9	21	736594	0.356403	0.350812	0.351461	0.353265	0.36931
2016	9	22	736596	0.331783	0.340326	0.331165	0.352227	0.368676
2016	9	23	736596	0.319979	0.316157	0.316629	0.350803	0.367832
2016	9	24	736598	0.319963	0.31901	0.319231	0.349481	0.367041
2016	9	25	736598	0.331701	0.328443	0.331189	0.348518	0.366442
2016	9	26	736600	0.322297	0.323326	0.321003	0.34729	0.365699
2016	9	27	736600	0.300616	0.29873	0.29841	0.345456	0.364627
2016	9	28	736602	0.326667	0.321006	0.325436	0.344412	0.363979
2016	9	29	736602	0.315277	0.319335	0.313109	0.343045	0.363155
2016	9	30	736604	0.287497	0.286412	0.28757	0.340992	0.361959
2016	10	1	736604	0.31046	0.305783	0.308491	0.339564	0.361097
2016	10	2	736606	0.302405	0.299351	0.299792	0.337921	0.360117
2016	10	3	736606	0.326042	0.319697	0.324213	0.336992	0.35952
2016	10	4	736608	0.343303	0.340802	0.341248	0.336558	0.35919
2016	10	5	736608	0.332134	0.332038	0.331226	0.335852	0.358714
2016	10	6	736610	0.380827	0.367729	0.37689	0.336436	0.358934
2016	10	7	736610	0.375721	0.377882	0.374694	0.336947	0.359117
2016	10	8	736612	0.367568	0.369317	0.367053	0.337234	0.359182
2016	10	9	736612	0.375115	0.365278	0.366815	0.337509	0.359243
2016	10	10	736614	0.345813	0.344708	0.345293	0.337177	0.358978
2016	10	11	736614	0.37613	0.36908	0.3762	0.337715	0.359183
2016	10	12	736616	0.397308	0.401767	0.395749	0.338789	0.359681
2016	10	13	736616	0.376652	0.376354	0.371951	0.339176	0.359811
2016	10	14	736618	0.36247	0.359962	0.362241	0.339285	0.359793
2016	10	15	736618	0.355543	0.351428	0.351981	0.339105	0.35962
2016	10	16	736620	0.379191	0.373062	0.377044	0.339629	0.359829
2016	10	17	736620	0.371405	0.375678	0.370901	0.33997	0.359941
2016	10	18	736622	0.391433	0.383501	0.387334	0.340764	0.360299
2016	10	19	736622	0.375896	0.37026	0.373701	0.341161	0.360447
2016	10	20	736624	0.414603	0.410609	0.408407	0.34252	0.361115
2016	10	21	736624	0.393726	0.389071	0.389101	0.343313	0.361482
2016	10	22	736626	0.38216	0.382914	0.380028	0.343836	0.361707
2016	10	23	736626	0.369879	0.363595	0.364976	0.343929	0.3617
2016	10	24	736628	0.396632	0.389825	0.38927	0.344699	0.362061
2016	10	25	736628	0.407722	0.391315	0.402655	0.345827	0.362618
2016	10	26	736630	0.386628	0.387924	0.38366	0.346402	0.362879
2016	10	27	736630	0.366096	0.370374	0.365614	0.346462	0.362864
2016	10	28	736632	0.373764	0.371952	0.367443	0.346572	0.362877
2016	10	29	736632	0.392117	0.378733	0.387753	0.347246	0.363197
2016	10	30	736634	0.366257	0.370185	0.36442	0.347256	0.363159
2016	10	31	736634	0.3448	0.340274	0.340056	0.346585	0.362754
2016	11	1	736636	0.34072	0.341602	0.340737	0.345947	0.362366
2016	11	2	736636	0.361006	0.361629	0.359955	0.345858	0.362274
2016	11	3	736638	0.347914	0.338208	0.339945	0.345211	0.361882
2016	11	4	736638	0.369699	0.363618	0.366213	0.345312	0.361891
2016	11	5	736640	0.368168	0.36433	0.364599	0.345365	0.361877
2016	11	6	736640	0.420393	0.410982	0.41795	0.346907	0.362667
2016	11	7	736642	0.413914	0.418959	0.412889	0.348277	0.363369
2016	11	8	736642	0.396885	0.388121	0.384927	0.348839	0.363638
2016	11	9	736644	0.36887	0.366905	0.368802	0.34894	0.363659
2016	11	10	736644	0.402044	0.394083	0.399408	0.349893	0.364142
2016	11	11	736646	0.404792	0.395493	0.395363	0.350714	0.364557
2016	11	12	736646	0.391553	0.387966	0.389501	0.351356	0.364876
2016	11	13	736648	0.360506	0.366756	0.357646	0.351095	0.36471
2016	11	14	736648	0.367973	0.355554	0.361567	0.350949	0.364606
2016	11	15	736650	0.363913	0.358855	0.360352	0.350772	0.364485
2016	11	16	736650	0.445878	0.426243	0.437025	0.35274	0.365523
2016	11	17	736652	0.430458	0.432227	0.429915	0.35447	0.366437
2016	11	18	736652	0.410569	0.408385	0.403659	0.355432	0.366941
2016	11	19	736654	0.422132	0.419875	0.42129	0.356868	0.367704
2016	11	20	736654	0.382402	0.379283	0.375115	0.356986	0.367757
2016	11	21	736656	0.371496	0.368004	0.369603	0.356948	0.367727
2016	11	22	736656	0.386855	0.383637	0.383607	0.357301	0.367909
2016	11	23	736658	0.381775	0.378089	0.37496	0.357406	0.367957
2016	11	24	736658	0.362241	0.361954	0.359697	0.357083	0.367774
2016	11	25	736660	0.357411	0.351939	0.356424	0.356675	0.367545
2016	11	26	736660	0.403189	0.396899	0.399888	0.357488	0.367975
2016	11	27	736662	0.377323	0.376979	0.372365	0.357517	0.367983
2016	11	28	736662	0.352935	0.348306	0.348148	0.356869	0.367626
2016	11	29	736664	0.34732	0.347438	0.347521	0.356217	0.367264
2016	11	30	736664	0.325665	0.326514	0.321063	0.354838	0.36651
2016	12	1	736666	0.372812	0.355592	0.370263	0.35486	0.366509
2016	12	2	736666	0.377531	0.375206	0.372165	0.354936	0.366537
2016	12	3	736668	0.35516	0.35938	0.353261	0.354482	0.366279
2016	12	4	736668	0.351678	0.34886	0.350129	0.353949	0.365978
2016	12	5	736670	0.35226	0.348973	0.34726	0.353347	0.365638
2016	12	6	736670	0.346587	0.33613	0.340403	0.352565	0.3652
2016	12	7	736672	0.364892	0.367197	0.365989	0.352513	0.365155
2016	12	8	736672	0.343758	0.337742	0.336201	0.351631	0.364661
2016	12	9	736674	0.336221	0.33353	0.335741	0.350753	0.364168
2016	12	10	736674	0.356949	0.349364	0.350048	0.350292	0.363899
2016	12	11	736676	0.356933	0.352179	0.354516	0.349965	0.363701
2016	12	12	736676	0.375521	0.377479	0.37471	0.350208	0.363811
2016	12	13	736678	0.384015	0.368263	0.375565	0.35047	0.363932
2016	12	14	736678	0.375093	0.36754	0.37113	0.350604	0.363984
2016	12	15	736680	0.389015	0.390259	0.383747	0.351087	0.364225
2016	12	16	736680	0.364691	0.362025	0.360134	0.350901	0.364107
2016	12	17	736682	0.340952	0.342272	0.340167	0.350161	0.363689
2016	12	18	736682	0.359508	0.355411	0.356837	0.349901	0.36353
2016	12	19	736684	0.357091	0.356475	0.352415	0.349523	0.363306
2016	12	20	736684	0.355762	0.34594	0.351429	0.349125	0.36307
2016	12	21	736686	0.353488	0.347686	0.35143	0.348735	0.362839
2016	12	22	736686	0.379665	0.368228	0.370439	0.348883	0.362897
2016	12	23	736688	0.380802	0.383126	0.377071	0.349214	0.363055
2016	12	24	736688	0.391767	0.381845	0.388658	0.349862	0.363385
2016	12	25	736690	0.388149	0.385017	0.384867	0.350391	0.363653
2016	12	26	736690	0.394121	0.390991	0.391745	0.351101	0.364021
2016	12	27	736692	0.375292	0.377407	0.374942	0.351329	0.364129
2016	12	28	736692	0.371915	0.371007	0.371246	0.351448	0.36418
2016	12	29	736694	0.374684	0.369326	0.371522	0.351573	0.364234
2016	12	30	736694	0.364101	0.363581	0.360246	0.351381	0.364117

## Sheet: SM2RAIN
Matlab Days	Year	Month	Day	Rainfall observed (mm)	Rainfall SM2RAIN 1 hr (mm)	Rainfall SM2RAIN MA 8 hr (mm)	Rainfall SM2RAIN SG 3rd order 13 hr (mm)
735584	2013	12	16	0	0	0	0
735586	2013	12	17	0	9.51843	0	0
735586	2013	12	18	0	0	0	0
735588	2013	12	19	0	0	0	0
735588	2013	12	20	0.39968	0.546218	1.23379	0
735590	2013	12	21	0	0	0	0
735590	2013	12	22	0	0	0	0
735592	2013	12	23	0	4.20425	0	0
735592	2013	12	24	0	0	0	0
735594	2013	12	25	0	0	0	0
735594	2013	12	26	0	0	0	0
735596	2013	12	27	0.69992	7.65301	1.75616	0.473855
735596	2013	12	28	0.10016	0	1.49597	0
735598	2013	12	29	0.10016	2.11705	0.661924	3.40664
735598	2013	12	30	0	0	0	0
735600	2013	12	31	0	0	0	0
735600	2014	1	1	0	0	0	0
735602	2014	1	2	0.79984	0.243279	1.94365	1.13572
735602	2014	1	3	0.0999201	0.665961	0	0
735604	2014	1	4	0	0	0	0
735604	2014	1	5	0.30024	1.11978	2.221	0.871183
735606	2014	1	6	0	0	0	0
735606	2014	1	7	0.19984	2.81995	0.52821	2.48655
735608	2014	1	8	0	0	0	0
735608	2014	1	9	0	0	0	0
735610	2014	1	10	1.2	3.29266	1.95766	8.13095
735610	2014	1	11	0.59952	7.94227	1.17684	0
735612	2014	1	12	0	0	0	0
735612	2014	1	13	0.19984	9.35778	0	0
735614	2014	1	14	0.19984	3.27364	0.656584	0.60961
735614	2014	1	15	0	0	0	0
735616	2014	1	16	0.10016	5.28953	0	0
735616	2014	1	17	0	0	0	0
735618	2014	1	18	0	0	0	0
735618	2014	1	19	0	0	0	0
735620	2014	1	20	1.15052	4.48159	2.40758	4.42687
735620	2014	1	21	10.1487	19.8251	15.2651	12.8788
735622	2014	1	22	0.59976	1.34612	3.9228	0
735622	2014	1	23	7.9936e-05	11.2357	1.74904	0
735624	2014	1	24	2.10016	8.16908	12.7206	9.90237
735624	2014	1	25	0	0	0	0
735626	2014	1	26	6.30048	13.9963	24.1503	22.9714
735626	2014	1	27	2.09868	5.36809	3.73665	1.26788
735628	2014	1	28	0.3	10.0049	5.802	10.086
735628	2014	1	29	0.0999201	4.35404	0	0.895546
735630	2014	1	30	0	0	0	0
735630	2014	1	31	0	4.9952	0	0
735632	2014	2	1	0	0	0	0
735632	2014	2	2	2.50024	1.96779	3.76282	0.764318
735634	2014	2	3	0.10008	0.203392	0	1.44568
735634	2014	2	4	0	0	4.11768	0
735636	2014	2	5	0	0	0	0
735636	2014	2	6	0	4.25931	0	0
735638	2014	2	7	0	0	0	0
735638	2014	2	8	0	0	0	0
735640	2014	2	9	4.80024	8.07275	7.98423	3.97353
735640	2014	2	10	0.10016	0	0	0.896712
735642	2014	2	11	2.09904	4.94878	6.20087	4.6423
735642	2014	2	12	0	0	0	0
735644	2014	2	13	0.0999201	2.56532	1.68927	0
735644	2014	2	14	0	0	0	0
735646	2014	2	15	0	4.11887	0	0
735646	2014	2	16	0.39968	0	2.58106	3.26028
735648	2014	2	17	0.0999201	5.14573	0	0
735648	2014	2	18	0.10016	5.62789	2.49399	8.33501
735650	2014	2	19	0.80008	5.60137	2.08833	3.44624
735650	2014	2	20	0	6.86416	0	0
735652	2014	2	21	1.99944	3.16789	4.20493	0.953494
735652	2014	2	22	0.10008	0.263979	0	0
735654	2014	2	23	0	0	0	0
735654	2014	2	24	0.0999201	0	0	0
735656	2014	2	25	0.10016	1.15044	0.995705	0.358715
735656	2014	2	26	0	0	0	0
735658	2014	2	27	0	0	0	0
735658	2014	2	28	0.20008	2.42209	5.16127	4.1098
735660	2014	3	1	0.0999201	2.93941	0	2.22069
735660	2014	3	2	0	0	0	0
735662	2014	3	3	0.0999201	0.852889	0.814515	0
735662	2014	3	4	0	0	0	0
735664	2014	3	5	0	0	0	0
735664	2014	3	6	0.0999201	0.277263	0	0.156555
735666	2014	3	7	0	0	0	0
735666	2014	3	8	0	0	0	0
735668	2014	3	9	0	0	0	0
735668	2014	3	10	0	0	0	0
735670	2014	3	11	0	0	0	0
735670	2014	3	12	0	0	0	0
735672	2014	3	13	0	0	0	0
735672	2014	3	14	0	0	0	0
735674	2014	3	15	3.09992	1.41112	3.29521	2.62361
735674	2014	3	16	3.2008	6.71777	9.23692	7.49148
735676	2014	3	17	0	0	0	0
735676	2014	3	18	0	0	0	0
735678	2014	3	19	0.10016	1.90862	0.204354	1.74641
735678	2014	3	20	0	0	0	0
735680	2014	3	21	0	0	0	0
735680	2014	3	22	0	0	0	0
735682	2014	3	23	9.39716	7.16498	9.67648	6.93635
735682	2014	3	24	4.80336	11.6392	6.10929	4.89004
735684	2014	3	25	0	0	0	0
735684	2014	3	26	0	5.22732	0	0
735686	2014	3	27	0	0	0	0
735686	2014	3	28	0	0	0	0
735688	2014	3	29	0	0	0	0
735688	2014	3	30	0	0	0	0
735690	2014	3	31	0	0	0	0
735690	2014	4	1	0	0	0	0
735692	2014	4	2	0	0	0	0
735692	2014	4	3	0	0	0	0
735694	2014	4	4	0	0	0	0
735694	2014	4	5	0	0	0	0
735696	2014	4	6	9.99201	5.10285	4.30775	5.31754
735696	2014	4	7	0	0	0	0
735698	2014	4	8	1.70164	3.02501	2.34249	1.5137
735698	2014	4	9	0	0	0	0
735700	2014	4	10	7.09864	10.1182	12.5029	11.6555
735700	2014	4	11	0	0	0	0
735702	2014	4	12	0	4.77629	0	0
735702	2014	4	13	3.50056	5.4549	1.67288	6.2597
735704	2014	4	14	4.40224	4.95356	0.705542	0.991882
735704	2014	4	15	6.2964	7.05599	10.0602	11.0152
735706	2014	4	16	0.69992	0.483951	0	0.558786
735706	2014	4	17	0	0	0	0
735708	2014	4	18	0	0	0	0
735708	2014	4	19	2.49992	3.01317	3.58234	4.8986
735710	2014	4	20	2.09856	7.11374	0	0.323538
735710	2014	4	21	0	0	0	0
735712	2014	4	22	0	0	0	0
735712	2014	4	23	0	0	0	0
735714	2014	4	24	4.20132	5.48275	2.24358	3.62749
735714	2014	4	25	0	0	0	0
735716	2014	4	26	0	0	0	0
735716	2014	4	27	4.19868	1.84931	5.00754	0.701939
735718	2014	4	28	0.29976	2.89445	0	0.229046
735718	2014	4	29	5.20759	9.50555	5.97933	3.5608
735720	2014	4	30	0	0	0	0
735720	2014	5	1	0	0	0	0
735722	2014	5	2	7.09872	0.223444	2.19772	3.78125
735722	2014	5	3	5.20008	10.6815	3.70547	5.65252
735724	2014	5	4	0	0	0	0
735724	2014	5	5	0	0	0	0
735726	2014	5	6	0	0	0	0
735726	2014	5	7	0.9	1.88938	0.260369	0.600488
735728	2014	5	8	0	0	0	0
735728	2014	5	9	5.09616	7.4987	1.66799	1.66703
735730	2014	5	10	1.09936	3.34999	2.60824	4.8569
735730	2014	5	11	6.30008	13.322	3.81813	7.33712
735732	2014	5	12	0.600879	1.80324	4.41404	3.16324
735732	2014	5	13	6.30024	2.87043	3.81494	7.79389
735734	2014	5	14	0.20008	0	0	0
735734	2014	5	15	0.400799	1.01481	0.315127	2.30327
735736	2014	5	16	31.9523	8.23965	7.43671	9.81526
735736	2014	5	17	20.7472	20.4312	20.1733	18.8799
735738	2014	5	18	3.70112	7.55048	7.29352	5.1338
735738	2014	5	19	0	0	0	0
735740	2014	5	20	0	0	0	0
735740	2014	5	21	0	0	0	0
735742	2014	5	22	0	0	0	0
735742	2014	5	23	1.80216	7.07455	3.80791	2.22482
735744	2014	5	24	0.0999201	3.21963	0.682765	0.813999
735744	2014	5	25	0	0	0	0
735746	2014	5	26	0.59952	0	1.63895	0
735746	2014	5	27	3.50016	4.9926	4.2133	4.77651
735748	2014	5	28	49.9947	24.4731	21.4913	23.5146
735748	2014	5	29	11.701	14.1082	7.13946	6.13606
735750	2014	5	30	1.99952	11.8328	4.67515	3.5679
735750	2014	5	31	2.39892	2.53764	5.31188	8.26122
735752	2014	6	1	0.7004	0.479116	5.98398	1.71989
735752	2014	6	2	0	0	0	0
735754	2014	6	3	0	0	0	0
735754	2014	6	4	0.50032	2.10082	0.983384	0.37329
735756	2014	6	5	0	4.33499	0	0
735756	2014	6	6	0	0	0	0
735758	2014	6	7	0	0	0	0
735758	2014	6	8	0	0	0	0
735760	2014	6	9	0	4.99385	0	0
735760	2014	6	10	0	0	0	0
735762	2014	6	11	0.9	0	0.259117	0.897932
735762	2014	6	12	0.19984	0.831002	0.25262	0
735764	2014	6	13	0	0	0	0
735764	2014	6	14	0.999201	0	0	0
735766	2014	6	15	0	0	0	0
735766	2014	6	16	0	0	0	0
735768	2014	6	17	0	0	0	0
735768	2014	6	18	0	0	0	0
735770	2014	6	19	0.0999201	0	0	1.56352
735770	2014	6	20	16.7875	4.19159	6.68911	4.32755
735772	2014	6	21	0	0	0	0
735772	2014	6	22	0	0	0	0
735774	2014	6	23	0	0	0	0
735774	2014	6	24	0	0	0	0
735776	2014	6	25	9.71035	6.40707	7.20786	2.8275
735776	2014	6	26	0	0	0	0
735778	2014	6	27	0	0	0	0
735778	2014	6	28	0	0	0	0
735780	2014	6	29	5.99708	3.64957	0.67909	1.7054
735780	2014	6	30	14.7016	11.8072	17.7572	13.9454
735782	2014	7	1	1.59944	3.89015	1.88964	6.27286
735782	2014	7	2	7.60052	9.63301	6.83752	4.19511
735784	2014	7	3	0	0	0	0
735784	2014	7	4	0	0	0	0
735786	2014	7	5	0.0999201	5.78529	1.0966	1.90585
735786	2014	7	6	0	0	0	0
735788	2014	7	7	0	0	0	0
735788	2014	7	8	11.5088	2.42454	5.30912	5.97062
735790	2014	7	9	2.1016	0.133773	0	0.432027
735790	2014	7	10	0	0	0	0
735792	2014	7	11	10.0934	1.73295	5.32767	3.55828
735792	2014	7	12	0	4.31521	0	0
735794	2014	7	13	0.60024	0.485865	0	0.458228
735794	2014	7	14	0	0	0	0
735796	2014	7	15	0	0	0	0
735796	2014	7	16	0	0	0	0
735798	2014	7	17	0	0	0	0
735798	2014	7	18	0	0	0	0
735800	2014	7	19	0	0	0	0
735800	2014	7	20	3.59712	0.867807	2.79014	2.48502
735802	2014	7	21	0	0	0	0
735802	2014	7	22	5.39988	8.5333	6.73396	7.60741
735804	2014	7	23	9.50392	7.03463	8.12662	1.95593
735804	2014	7	24	0.0999201	1.83566	0.738031	0
735806	2014	7	25	0	0	0	0
735806	2014	7	26	0	0	0	0
735808	2014	7	27	3.2052	3.05054	0.537084	0.700999
735808	2014	7	28	1.79992	0.749859	3.23491	1.97076
735810	2014	7	29	0	0	0	0
735810	2014	7	30	6.29932	0.630987	0.921902	2.7139
735812	2014	7	31	8.80312	12.8743	13.4497	17.4564
735812	2014	8	1	0	4.00008	0	0
735814	2014	8	2	0	0	0	0
735814	2014	8	3	0.0999201	0	0.666324	0
735816	2014	8	4	0	0	0	0
735816	2014	8	5	0.19984	0.472893	0	0
735818	2014	8	6	0.0999201	0	0	0
735818	2014	8	7	0	0	0	0
735820	2014	8	8	0	0	0	0
735820	2014	8	9	41.8462	7.90548	8.67114	11.6495
735822	2014	8	10	0	0	0	0
735822	2014	8	11	1.20188	6.76942	2.14191	2.27518
735824	2014	8	12	9.70124	20.5809	10.7733	7.44465
735824	2014	8	13	8.99776	11.724	4.75251	8.63287
735826	2014	8	14	0	0	0	0
735826	2014	8	15	0.59952	0	0.260113	0
735828	2014	8	16	0	0	0	0
735828	2014	8	17	0	0	0	0
735830	2014	8	18	0	0	0	0
735830	2014	8	19	1.3996	3.21122	1.46719	0.867336
735832	2014	8	20	9.402	7.6048	10.2103	7.34937
735832	2014	8	21	4.30168	4.55915	1.5179	3.51558
735834	2014	8	22	16.9974	5.15509	7.64121	6.47025
735834	2014	8	23	7.09576	8.52928	7.76459	3.71677
735836	2014	8	24	0.900839	8.29124	0.296808	6.80197
735836	2014	8	25	0	0	0	0
735838	2014	8	26	1.29944	4.84068	3.86255	4.95896
735838	2014	8	27	2.6008	0.950291	1.58371	0.891326
735840	2014	8	28	0	0	0	0
735840	2014	8	29	0	0	0	0
735842	2014	8	30	13.695	11.4314	9.64583	11.569
735842	2014	8	31	3.50056	7.783	3.17518	3.60686
735844	2014	9	1	21.6984	11.4909	14.0325	9.99927
735844	2014	9	2	15.7993	10.975	7.23728	8.36394
735846	2014	9	3	3.9004	16.304	12.0904	12.6243
735846	2014	9	4	0	0	0	0
735848	2014	9	5	0	4.25649	0	0
735848	2014	9	6	0.0999201	1.9044	1.13616	0.633292
735850	2014	9	7	0	0	0	0
735850	2014	9	8	0	0	0	0
735852	2014	9	9	0.39968	4.504	0	0.322255
735852	2014	9	10	0	0	0	0
735854	2014	9	11	20.3413	14.5206	10.8566	11.5747
735854	2014	9	12	6.65076	4.67262	2.12472	2.22672
735856	2014	9	13	18.1027	7.71892	10.4134	9.71335
735856	2014	9	14	2.70168	19.4413	6.58622	6.63462
735858	2014	9	15	0.20032	2.46533	1.7486	1.09365
735858	2014	9	16	0	0	0	0
735860	2014	9	17	0	0	0	0
735860	2014	9	18	0	0	0	0
735862	2014	9	19	0	0	0	0
735862	2014	9	20	0.000159872	4.01787	0.245319	0
735864	2014	9	21	1.99968	8.12803	3.80186	3.27295
735864	2014	9	22	3.39908	7.53459	9.86546	9.84138
735866	2014	9	23	3.49972	5.16997	0	0.518749
735866	2014	9	24	0	0	0	0
735868	2014	9	25	5.5978	6.75458	2.9485	5.33159
735868	2014	9	26	1.70032	4.48091	1.23525	0.15745
735870	2014	9	27	0.29976	0	0	0
735870	2014	9	28	0.0999201	4.14958	0	0
735872	2014	9	29	0.0999201	0	0.382811	0
735872	2014	9	30	0	0	0	0
735874	2014	10	1	8.19848	9.35389	6.49607	6.06266
735874	2014	10	2	0	0	0	0
735876	2014	10	3	0.20008	1.13556	4.88019	0.922288
735876	2014	10	4	0	4.08696	0	0
735878	2014	10	5	0	0	0	0
735878	2014	10	6	0	0	0	0
735880	2014	10	7	0	0	0	0
735880	2014	10	8	0	0	0	0
735882	2014	10	9	0	5.10612	0	0
735882	2014	10	10	0.0999201	2.73487	0	0.251227
735884	2014	10	11	0.30032	0	0	0
735884	2014	10	12	0.70056	4.1905	0.338118	1.75661
735886	2014	10	13	0.4996	3.09986	2.26562	0
735886	2014	10	14	0	4.42659	0	0
735888	2014	10	15	0	0	0	0
735888	2014	10	16	0.19984	5.17046	1.6795	0.132072
735890	2014	10	17	14.9013	12.1886	16.2443	14.7386
735890	2014	10	18	0	8.97191	0	0
735892	2014	10	19	0.10016	2.97296	0.506605	7.00044
735892	2014	10	20	7.44956	5.47317	2.32127	12.5413
735894	2014	10	21	15.0479	5.81672	11.0772	2.74288
735894	2014	10	22	11.2014	7.3676	6.98612	9.64387
735896	2014	10	23	17.3039	13.9484	10.4843	12.1201
735896	2014	10	24	0.29988	0.439065	0	0
735898	2014	10	25	0	0	0	0
735898	2014	10	26	0	4.2502	0	0
735900	2014	10	27	0	0	0	0
735900	2014	10	28	0	0	0	0
735902	2014	10	29	0	4.81273	0	0
735902	2014	10	30	0	0	0	0
735904	2014	10	31	0	0	0	0
735904	2014	11	1	0	5.27284	0	0
735906	2014	11	2	0	0	0	0
735906	2014	11	3	0	5.57909	0	0
735908	2014	11	4	0	0	0	0
735908	2014	11	5	0.19984	0.957681	0	0.153405
735910	2014	11	6	0	0	0	0
735910	2014	11	7	0.50032	0.682341	1.83248	0.7726
735912	2014	11	8	2.4	6.34468	1.45141	1.47583
735912	2014	11	9	0	0	0	0
735914	2014	11	10	0	0	0	0
735914	2014	11	11	0	0	0	0
735916	2014	11	12	0.0999201	0	0	0.587639
735916	2014	11	13	0.19984	0.141818	4.96194	2.57683
735918	2014	11	14	0	0	0	0
735918	2014	11	15	0	0	0	0
735920	2014	11	16	0	0	0	0
735920	2014	11	17	0	0	0	0
735922	2014	11	18	2.00176	0	0.673617	0
735922	2014	11	19	0.80008	3.48879	2.13065	2.58391
735924	2014	11	20	0	0	0	0
735924	2014	11	21	0	0	0	0
735926	2014	11	22	0	0	0	0
735926	2014	11	23	0	0	0	0
735928	2014	11	24	0	0	0	0
735928	2014	11	25	0	0	0	0
735930	2014	11	26	0	0	0	0
735930	2014	11	27	0	0	0	0
735932	2014	11	28	0	0	0	0
735932	2014	11	29	0	0	0	0
735934	2014	11	30	0	0	0	0
735934	2014	12	1	3.19888	4.71318	1.47219	2.51297
735936	2014	12	2	0	0	0	0
735936	2014	12	3	0.29976	1.19381	0	1.00636
735938	2014	12	4	0	0	0	0
735938	2014	12	5	0.49984	2.50409	2.13598	3.55396
735940	2014	12	6	3.30088	6.02934	5.18843	3.09197
735940	2014	12	7	18.401	8.42773	6.97344	5.75516
735942	2014	12	8	0.30008	0.276168	1.5213	0.253925
735942	2014	12	9	7.9936e-05	0	0.682141	0.279116
735944	2014	12	10	0.20008	1.99361	3.12052	0.484325
735944	2014	12	11	0.89992	5.2483	4.08483	5.16403
735946	2014	12	12	0	0	0	0
735946	2014	12	13	0	0	0	0
735948	2014	12	14	0	4.24903	0	0
735948	2014	12	15	0	0	0	0
735950	2014	12	16	2.49952	3.30479	0.838036	1.36362
735950	2014	12	17	1.00008	4.41178	1.1488	1.73647
735952	2014	12	18	2.69928	16.5209	9.68434	10.0073
735952	2014	12	19	2.90064	1.46004	2.19683	1.67605
735954	2014	12	20	6.89904	7.81003	1.32015	4.04453
735954	2014	12	21	0.60052	5.71967	2.24097	2.33018
735956	2014	12	22	0	0	0	0
735956	2014	12	23	0	0	0	0
735958	2014	12	24	0	0	0	0
735958	2014	12	25	2.19956	5.53094	2.93039	0.9612
735960	2014	12	26	2.09952	6.36202	2.19894	10.0845
735960	2014	12	27	0.8996	5.38563	7.26893	5.78564
735962	2014	12	28	1.00056	1.21497	2.01167	2.01019
735962	2014	12	29	1.99996	2.57973	3.92657	3.46251
735964	2014	12	30	0	0	0	0
735964	2014	12	31	1.39936	9.01812	4.20036	0.859443
735966	2015	1	1	1.79952	6.6287	6.39697	5.29233
735966	2015	1	2	3.99776	10.952	1.85705	2.92211
735968	2015	1	3	8.94872	6.07699	3.86226	6.72999
735968	2015	1	4	9.55076	19.1793	11.0117	9.86644
735970	2015	1	5	2.20048	7.35194	4.03177	4.35653
735970	2015	1	6	1.70024	8.79984	7.57095	5.15841
735972	2015	1	7	0.50008	6.17232	4.71061	3.72843
735972	2015	1	8	1.39948	1.17618	0.928328	5.18974
735974	2015	1	9	3.80128	6.18143	5.33865	9.0084
735974	2015	1	10	10.5028	5.96898	8.2312	5.68584
735976	2015	1	11	10.1998	2.0596	1.70275	2.52936
735976	2015	1	12	0.50024	2.48891	2.73665	3.44809
735978	2015	1	13	0	0	0	0
735978	2015	1	14	1.69912	1.94578	3.79265	1.60467
735980	2015	1	15	0	0	0	0
735980	2015	1	16	0	0	0	0
735982	2015	1	17	6.10076	4.39387	2.2595	4.22062
735982	2015	1	18	0	0	0	0
735984	2015	1	19	0	0	0	0
735984	2015	1	20	0	0	0	0
735986	2015	1	21	0	0	0	0
735986	2015	1	22	0.10016	1.88068	1.41087	1.80098
735988	2015	1	23	3.99896	7.12711	5.73293	3.94237
735988	2015	1	24	1.29968	1.68507	0.836668	1.81215
735990	2015	1	25	0.19984	0	0.351401	0
735990	2015	1	26	0	0	0	0
735992	2015	1	27	7.5018	13.5266	9.93618	8.11287
735992	2015	1	28	0	0	0	0
735994	2015	1	29	2.1006	8.73495	14.2875	20.9082
735994	2015	1	30	4.30064	9.36746	5.31803	10.8375
735996	2015	1	31	0.59952	2.10733	1.59124	0.931279
735996	2015	2	1	0.19984	5.24123	0.205966	0
735998	2015	2	2	1.8992	13.2303	6.9237	6.08487
735998	2015	2	3	0.0999201	0.685384	0.703716	0.759162
736000	2015	2	4	0	0	0	0
736000	2015	2	5	0	0	0	0
736002	2015	2	6	0	4.73903	0	0
736002	2015	2	7	0	4.36834	0	0
736004	2015	2	8	3.09896	10.2418	5.6636	3.35306
736004	2015	2	9	5.40132	10.8145	11.7834	13.7569
736006	2015	2	10	0	0	0	4.91141
736006	2015	2	11	0	0	0	0
736008	2015	2	12	0	0	0	8.89192
736008	2015	2	13	0	10.4587	0	0
736010	2015	2	14	0.10016	0.0665003	0.66123	0.817832
736010	2015	2	15	0.0999201	4.23493	8.85598	3.69994
736012	2015	2	16	0	0	0	0
736012	2015	2	17	0	0	0	0
736014	2015	2	18	0.10016	1.40495	4.71383	0
736014	2015	2	19	0	0	0	0
736016	2015	2	20	0.20032	5.89504	0.598168	0.184478
736016	2015	2	21	0.10016	3.66538	1.2781	0.611387
736018	2015	2	22	3.29928	11.7918	5.52353	5.33667
736018	2015	2	23	1.6988	9.3724	4.61786	3.136
736020	2015	2	24	6.29816	9.93067	8.55606	3.83336
736020	2015	2	25	0.20008	11.4624	0	0
736022	2015	2	26	0	0	0	0
736022	2015	2	27	0.20008	0.528009	0.526577	0
736024	2015	2	28	0.30024	2.35142	2.06196	0.275933
736024	2015	3	1	1.20088	3.42964	4.60383	3.84042
736026	2015	3	2	13.3029	11.7915	8.93687	10.1773
736026	2015	3	3	2.59792	2.41868	0.966659	3.53543
736028	2015	3	4	1.30136	11.336	9.60681	4.06302
736028	2015	3	5	0	0	0	0
736030	2015	3	6	0	0	0	0
736030	2015	3	7	0	0	0	0
736032	2015	3	8	0.19984	0	0.236642	0
736032	2015	3	9	0	0	0	0
736034	2015	3	10	0	4.07857	0	0
736034	2015	3	11	6.99752	4.11489	3.64244	2.80119
736036	2015	3	12	0	0	0	0
736036	2015	3	13	0	0	0	0
736038	2015	3	14	0	0	0	0
736038	2015	3	15	0	0	0	0
736040	2015	3	16	0	0	0	0
736040	2015	3	17	0	0	0	0
736042	2015	3	18	0	0	0	0
736042	2015	3	19	0	0	0	0
736044	2015	3	20	0	0	0	0
736044	2015	3	21	0	0	0	0
736046	2015	3	22	1.20024	1.85205	2.77869	0
736046	2015	3	23	0	0	0	0
736048	2015	3	24	0	0	0	0
736048	2015	3	25	0	0	0	0
736050	2015	3	26	0.89988	5.60657	2.55309	9.57007
736050	2015	3	27	3.29964	4.3866	4.27376	2.70976
736052	2015	3	28	0	0	0	0
736052	2015	3	29	3.6492	6.61374	5.38498	2.89968
736054	2015	3	30	11.147	10.1277	8.22145	6.11469
736054	2015	3	31	4.49976	10.2508	6.05057	6.73138
736056	2015	4	1	8.5016	6.61502	2.9744	3.0163
736056	2015	4	2	6.29964	9.48309	9.08504	6.37683
736058	2015	4	3	0	0	0	0
736058	2015	4	4	0	0	0	0
736060	2015	4	5	0.30048	1.99564	0.903422	0.419777
736060	2015	4	6	0.0999201	0.998385	0.202027	0.130564
736062	2015	4	7	0	0	0	0
736062	2015	4	8	0	0	0	0
736064	2015	4	9	0	0	0	0
736064	2015	4	10	0	0	0	0
736066	2015	4	11	0	0	0	0
736066	2015	4	12	0	0	0	0
736068	2015	4	13	0.3	1.02004	1.27876	0.722665
736068	2015	4	14	0	0	0	0
736070	2015	4	15	0	0	0	0
736070	2015	4	16	0	0	0	0
736072	2015	4	17	19.1917	6.33413	9.18217	5.05513
736072	2015	4	18	0	0	0	0
736074	2015	4	19	0	0	0	0
736074	2015	4	20	0	0	0	0
736076	2015	4	21	0	0	0	0
736076	2015	4	22	0	0	0	0
736078	2015	4	23	0.4996	1.57154	2.00097	0
736078	2015	4	24	0	0	0	0
736080	2015	4	25	0	0	0	0
736080	2015	4	26	0.10016	3.4136	2.67115	1.07838
736082	2015	4	27	0	0	0	0
736082	2015	4	28	0.50008	0.857345	0.942524	0
736084	2015	4	29	0	0	0	0
736084	2015	4	30	2.30008	2.56777	3.7829	0.400825
736086	2015	5	1	2.9986	4.40772	4.84972	3.55536
736086	2015	5	2	3.70096	9.85068	8.6279	5.81338
736088	2015	5	3	2.60032	12.4387	10.9534	11.818
736088	2015	5	4	1.2992	4.96554	2.15034	6.75287
736090	2015	5	5	0	0	0	0
736090	2015	5	6	5.80016	3.09142	2.09817	4.48614
736092	2015	5	7	0.0999201	0	0.764689	0
736092	2015	5	8	0	0	0	0
736094	2015	5	9	0.59952	1.08152	1.10628	1.80984
736094	2015	5	10	0	0	0	0
736096	2015	5	11	0	4.05926	0	0
736096	2015	5	12	0	0	0	0
736098	2015	5	13	1.5006	0.701347	1.99564	2.08607
736098	2015	5	14	6.09968	4.40719	8.60552	6.6139
736100	2015	5	15	0	0	0	0
736100	2015	5	16	0	0	0	0
736102	2015	5	17	0	0	0	0
736102	2015	5	18	0	0	0	0
736104	2015	5	19	0.30048	1.90609	3.66827	1.70215
736104	2015	5	20	11.302	7.11123	7.18812	5.47306
736106	2015	5	21	7.69976	7.90821	5.17226	5.10027
736106	2015	5	22	4.1996	3.05318	5.45788	3.89872
736108	2015	5	23	39.0984	18.7788	13.3501	22.6258
736108	2015	5	24	0.50008	8.25342	0	1.62986
736110	2015	5	25	0	0	0	0
736110	2015	5	26	2.4012	7.7514	8.69481	5.35851
736112	2015	5	27	0.30024	2.54793	1.77143	0.537157
736112	2015	5	28	0	0	0	0
736114	2015	5	29	0	0	0	0
736114	2015	5	30	0.4996	0.454279	1.39319	0
736116	2015	5	31	0	0	0	0
736116	2015	6	1	0	0	0	0
736118	2015	6	2	0	0	0	0
736118	2015	6	3	0	0	0	0
736120	2015	6	4	0	0	0	0
736120	2015	6	5	0	0	0	0
736122	2015	6	6	0	0	0	0
736122	2015	6	7	0	0	0	0
736124	2015	6	8	9.89209	3.37802	4.28776	5.5979
736124	2015	6	9	7.9936e-05	0	0.596516	0
736126	2015	6	10	0.10008	0	0.344313	0
736126	2015	6	11	0	0	0	0
736128	2015	6	12	0	0	0	0
736128	2015	6	13	6.4948	1.9619	0.521236	3.20001
736130	2015	6	14	3.10496	0	1.64001	0
736130	2015	6	15	0.30008	0.858459	0	2.70923
736132	2015	6	16	0.10008	3.06703	1.48838	1.76334
736132	2015	6	17	0	0	0	0
736134	2015	6	18	0.39968	0	0.15641	0.657577
736134	2015	6	19	11.8995	3.87581	6.20937	7.98483
736136	2015	6	20	6.89568	3.70595	3.37898	3.63676
736136	2015	6	21	0.39968	0	0	0
736138	2015	6	22	2.90296	6.27565	8.94429	5.27564
736138	2015	6	23	4.702	2.85747	0.999007	0
736140	2015	6	24	0	0	0	0
736140	2015	6	25	0	0	0	0
736142	2015	6	26	0	0	0	0
736142	2015	6	27	3.2516	3.65147	3.51978	4.83514
736144	2015	6	28	6.04972	4.19558	1.09176	0.832208
736144	2015	6	29	0.19984	0.574347	0	0
736146	2015	6	30	0	0	0	0
736146	2015	7	1	0	0	0	0
736148	2015	7	2	0	0	0	0
736148	2015	7	3	0	0	0	0
736150	2015	7	4	0	0	0	0
736150	2015	7	5	0	0	0	0
736152	2015	7	6	0	0	0	0
736152	2015	7	7	0	0	0	0
736154	2015	7	8	10.3034	7.26882	4.24154	7.18403
736154	2015	7	9	4.39888	4.9447	5.33264	6.41287
736156	2015	7	10	0	0	0	0
736156	2015	7	11	0	0	0	0
736158	2015	7	12	0	0	0	0
736158	2015	7	13	1.40068	6.61134	9.81482	4.06212
736160	2015	7	14	2.49992	7.65192	3.13324	4.77718
736160	2015	7	15	0.30024	6.33283	1.10466	3.57593
736162	2015	7	16	0	0	0	0
736162	2015	7	17	0	0	0	0
736164	2015	7	18	0.19984	0	0	0
736164	2015	7	19	10.4945	5.12479	4.18802	4.88627
736166	2015	7	20	0.899281	2.37724	3.4362	0.215067
736166	2015	7	21	0	0	0	0
736168	2015	7	22	0	0	0	0
736168	2015	7	23	0.39968	2.84441	0.779585	0.080143
736170	2015	7	24	0	0	0	0
736170	2015	7	25	2.70096	2.46827	0.199656	2.97757
736172	2015	7	26	0	0	0	0
736172	2015	7	27	4.70596	5.32793	5.15905	2.60546
736174	2015	7	28	0	0	0	0
736174	2015	7	29	6.69968	4.37166	6.78726	7.19506
736176	2015	7	30	0	0	0	0
736176	2015	7	31	0	0	0	0
736178	2015	8	1	0	0	0	0
736178	2015	8	2	3.59892	6.56229	5.82337	4.0823
736180	2015	8	3	0	0	0	0
736180	2015	8	4	0	0	0	0
736182	2015	8	5	0	0	0	0
736182	2015	8	6	0	0	0	0
736184	2015	8	7	0	0	0	0
736184	2015	8	8	0	0	0	0
736186	2015	8	9	0	0	0	0
736186	2015	8	10	0	0	0	0
736188	2015	8	11	0	0	0	0
736188	2015	8	12	0	0	0	0
736190	2015	8	13	0	0	0	0
736190	2015	8	14	0	0	0	0
736192	2015	8	15	0	0	0	0
736192	2015	8	16	4.30048	4.64794	3.63363	3.48204
736194	2015	8	17	28.2935	11.5609	21.8455	15.453
736194	2015	8	18	0	0	0	0
736196	2015	8	19	0.19984	0	0	0.0684593
736196	2015	8	20	5.40036	4.87591	3.34946	4.45592
736198	2015	8	21	0	0	0	0
736198	2015	8	22	0	0	0	0
736200	2015	8	23	0	0	0	0
736200	2015	8	24	0	0	0	0
736202	2015	8	25	0	0	0	0
736202	2015	8	26	0	0	0	0
736204	2015	8	27	0	0	0	0
736204	2015	8	28	0	0	0	0
736206	2015	8	29	0	0	0	0
736206	2015	8	30	0	4.08077	0	0
736208	2015	8	31	0	0	0	0
736208	2015	9	1	0	0	0	0
736210	2015	9	2	6.09704	3.00291	2.46409	5.17891
736210	2015	9	3	21.5992	9.12691	9.36296	9.80088
736212	2015	9	4	4.60088	7.39926	8.50344	5.7613
736212	2015	9	5	2.99952	4.09095	1.09809	0.821671
736214	2015	9	6	0.49984	4.52961	1.80294	0
736214	2015	9	7	1.3004	3.41944	2.63845	4.77547
736216	2015	9	8	0	0	0	0
736216	2015	9	9	0	0	0	0
736218	2015	9	10	0	0	0	0
736218	2015	9	11	0	0	0	0
736220	2015	9	12	0	0	0	0
736220	2015	9	13	0	0	0	0
736222	2015	9	14	5.80616	1.86974	1.74733	1.30604
736222	2015	9	15	0	0	0	0
736224	2015	9	16	0	0	0	0
736224	2015	9	17	0	0	0	0
736226	2015	9	18	1.90304	1.39834	0.548006	0.0977535
736226	2015	9	19	0.79984	0	0	1.12759
736228	2015	9	20	0.80032	1.02767	0.534317	2.93598
736228	2015	9	21	0	0	0	0
736230	2015	9	22	0	0	0	0
736230	2015	9	23	3.70056	6.56648	3.67561	6.06377
736232	2015	9	24	3.5996	0.853144	4.20833	3.99756
736232	2015	9	25	1.20072	3.44655	0.177836	2.68775
736234	2015	9	26	0	0	0	0
736234	2015	9	27	0	0	0	0
736236	2015	9	28	0	0	0	0
736236	2015	9	29	0	0	0	0
736238	2015	9	30	0	0	0	0
736238	2015	10	1	0	0	0	0
736240	2015	10	2	0	0	0	0
736240	2015	10	3	0	0	0	0
736242	2015	10	4	1.80024	1.65704	0.319095	1.6895
736242	2015	10	5	0	0	0	0
736244	2015	10	6	0	0	0	0
736244	2015	10	7	9.20084	8.25102	8.54286	10.3336
736246	2015	10	8	36.8996	13.1765	15.606	12.2858
736246	2015	10	9	0	0	0	0
736248	2015	10	10	0.30032	1.53837	0.403588	0
736248	2015	10	11	5.79972	3.70585	1.96452	3.09908
736250	2015	10	12	0.0999201	2.82657	1.00546	0
736250	2015	10	13	0.19984	1.2654	0.142378	0
736252	2015	10	14	6.09968	11.752	8.89968	10.963
736252	2015	10	15	0.20032	5.40814	1.06812	0.379428
736254	2015	10	16	5.40024	4.98507	3.39167	4.54181
736254	2015	10	17	0	0	0	0
736256	2015	10	18	0	0	0	0
736256	2015	10	19	12.8512	6.5469	8.42775	6.46527
736258	2015	10	20	9.85108	3.78895	4.03049	5.57384
736258	2015	10	21	0	8.82029	0	0
736260	2015	10	22	0	0	0	0
736260	2015	10	23	0.3	4.25136	2.81493	4.57407
736262	2015	10	24	0	5.23968	0	0
736262	2015	10	25	0	0	0	0
736264	2015	10	26	0	0	0	0
736264	2015	10	27	0	0	0	0
736266	2015	10	28	0	4.25242	0	0
736266	2015	10	29	0	0	0	0
736268	2015	10	30	0	0	0	0
736268	2015	10	31	0	0	0	0
736270	2015	11	1	0	0	0	0
736270	2015	11	2	0.19984	0.262922	0	0
736272	2015	11	3	0.19984	0.0464058	3.53757	0
736272	2015	11	4	0.20032	2.45012	2.25649	1.35547
736274	2015	11	5	0.0999201	0	0.870192	0.501863
736274	2015	11	6	0	0	0	0
736276	2015	11	7	2.69916	3.52863	5.69718	6.70724
736276	2015	11	8	0	0	0	0
736278	2015	11	9	0.79984	1.23173	2.18078	0.183062
736278	2015	11	10	0	0	0	0
736280	2015	11	11	0	0	0	0
736280	2015	11	12	0.19984	4.72419	0	0
736282	2015	11	13	0.19984	0.337822	1.31708	0
736282	2015	11	14	1.40128	0.262651	2.17162	0
736284	2015	11	15	7.89976	15.0686	11.6245	14.6671
736284	2015	11	16	0.20024	3.60468	5.11538	0.421747
736286	2015	11	17	0	4.49042	0	0
736286	2015	11	18	0.69968	0	0	0.629196
736288	2015	11	19	0.59964	1.10665	2.79219	0
736288	2015	11	20	10.6998	14.285	7.92761	7.79283
736290	2015	11	21	3.80024	4.00083	1.40851	0.617558
736290	2015	11	22	1.59956	6.21417	2.74893	4.3019
736292	2015	11	23	0.4004	1.3223	2.95841	4.91963
736292	2015	11	24	0.10016	0	1.14207	1.83056
736294	2015	11	25	2.00064	4.80339	1.52497	2.35531
736294	2015	11	26	7.80016	15.9522	16.2763	12.8084
736296	2015	11	27	0	0	0	0
736296	2015	11	28	2.70048	3.74133	1.05136	1.23211
736298	2015	11	29	1.99912	3.70127	2.63183	3.72847
736298	2015	11	30	4.6006	8.40555	4.34469	7.04466
736300	2015	12	1	5.29912	9.90675	4.80691	9.30875
736300	2015	12	2	0.2	6.59486	3.53128	1.96005
736302	2015	12	3	0	0	0	0
736302	2015	12	4	0.30024	4.74543	0	0.850239
736304	2015	12	5	0	0	0	0
736304	2015	12	6	0.3	4.23635	3.31991	1.10995
736306	2015	12	7	0	0	0	0
736306	2015	12	8	0.0999201	4.3684	0	0
736308	2015	12	9	4.00028	8.7742	5.94583	5.40467
736308	2015	12	10	0	0	0	0
736310	2015	12	11	0	0	0	0
736310	2015	12	12	0.20032	2.574	0	2.16837
736312	2015	12	13	0.10016	1.66222	0	0
736312	2015	12	14	0	0	0	0
736314	2015	12	15	0.29976	0.837298	0.322632	0.438976
736314	2015	12	16	0	0	0	0
736316	2015	12	17	2.9002	9.47292	6.58982	3.27394
736316	2015	12	18	0.20008	3.47928	0.799979	3.3652
736318	2015	12	19	0	4.35578	0	0
736318	2015	12	20	0	0	0	0
736320	2015	12	21	0.0999201	0	0	0.826474
736320	2015	12	22	0	0	0	0
736322	2015	12	23	0.19984	0.885547	0	1.36945
736322	2015	12	24	0	0	0	0
736324	2015	12	25	0.0999201	1.88256	0.655453	0.32931
736324	2015	12	26	0.20008	4.89184	2.37262	2.45563
736326	2015	12	27	0.19984	1.89071	0.819616	1.33974
736326	2015	12	28	0.10016	0.896586	1.66719	3.12044
736328	2015	12	29	0.39992	0.698157	3.12076	3.03678
736328	2015	12	30	0	0	0	0
736330	2015	12	31	0.10016	0.503664	2.16836	0.557926
736330	2016	1	1	0.49984	3.04479	0.704262	0.969887
736332	2016	1	2	0	0	0	0
736332	2016	1	3	0.79984	2.37227	1.21123	0.869031
736334	2016	1	4	3.69864	6.23843	6.4553	5.79021
736334	2016	1	5	0.30008	0	0	0
736336	2016	1	6	0	4.80614	0	0
736336	2016	1	7	1.29944	2.83254	2.84619	3.2268
736338	2016	1	8	0	0	0	0
736338	2016	1	9	2.8002	1.66911	4.37295	0.744465
736340	2016	1	10	1.90048	7.11329	2.9212	3.27829
736340	2016	1	11	5.79872	6.40644	3.61988	0.973177
736342	2016	1	12	0.59952	0.73352	1.23199	2.05387
736342	2016	1	13	4.90016	4.53479	2.38995	2.05514
736344	2016	1	14	0	4.7951	0	0
736344	2016	1	15	1.00016	7.50414	5.53357	3.54153
736346	2016	1	16	0.4004	2.7338	1.03245	0
736346	2016	1	17	3.49956	11.9262	7.45668	13.5784
736348	2016	1	18	0.6996	2.84181	5.41076	7.13748
736348	2016	1	19	0	0	0	0
736350	2016	1	20	0	0	0	0
736350	2016	1	21	2.1012	13.768	1.98361	3.54255
736352	2016	1	22	0	4.14676	0	0
736352	2016	1	23	7.29776	13.5703	15.2093	12.0665
736354	2016	1	24	0	4.76303	0	0
736354	2016	1	25	2.29888	11.5935	9.96379	10.262
736356	2016	1	26	0	0	0	0
736356	2016	1	27	0.0999201	0.605616	1.11112	0
736358	2016	1	28	1	0	1.28716	0.21713
736358	2016	1	29	5.70028	6.83037	2.15878	0.735398
736360	2016	1	30	0.00127898	0	0	0.584613
736360	2016	1	31	13.5006	13.2974	9.72584	5.25609
736362	2016	2	1	13.1003	12.7525	12.5745	11.4476
736362	2016	2	2	0	4.31641	0	0
736364	2016	2	3	6.90188	6.12489	5.77183	3.76534
736364	2016	2	4	2.90216	5.39689	3.79282	2.70936
736366	2016	2	5	0	0	0	0
736366	2016	2	6	0	5.42262	0	0
736368	2016	2	7	0.10016	2.20753	1.31665	0.401881
736368	2016	2	8	0.20032	0	0	0
736370	2016	2	9	5.50356	6.27375	1.26556	2.18714
736370	2016	2	10	10.0014	16.9785	14.3774	10.7569
736372	2016	2	11	0.69992	1.35813	0.764941	3.81437
736372	2016	2	12	0.19984	1.01298	0	0
736374	2016	2	13	0	0	0	0
736374	2016	2	14	0.20032	3.70192	0.759273	1.64017
736376	2016	2	15	1.89968	4.50032	3.04261	5.19676
736376	2016	2	16	0.10032	1.5276	0.681027	0.835188
736378	2016	2	17	0.80016	4.37487	1.56658	1.2351
736378	2016	2	18	0.99992	3.79155	2.84952	5.3657
736380	2016	2	19	3.80032	5.70186	3.68814	0.295146
736380	2016	2	20	4.60016	2.39457	4.97282	1.50371
736382	2016	2	21	7.6022	15.5608	13.6227	14.371
736382	2016	2	22	0	9.08039	0	0
736384	2016	2	23	3.0996	7.64355	0	1.72429
736384	2016	2	24	2.10008	4.01083	0.258707	4.04338
736386	2016	2	25	0.900719	7.40158	4.12528	1.77455
736386	2016	2	26	0	0	0	0
736388	2016	2	27	0	0	0	0
736388	2016	2	28	0	0	0	0
736390	2016	2	29	1.69872	4.62286	3.7038	1.1527
736390	2016	3	1	1.7	10.1516	3.53203	4.7315
736392	2016	3	2	2.89872	4.74272	0.736887	3.29687
736392	2016	3	3	4.09976	4.31638	3.74334	5.19443
736394	2016	3	4	0.0999201	5.81283	1.14068	0.958489
736394	2016	3	5	0	0	0	0
736396	2016	3	6	0.7996	1.24499	5.53754	1.79231
736396	2016	3	7	2.0004	3.65162	3.67701	4.82818
736398	2016	3	8	2.29928	18.2228	4.45234	1.53983
736398	2016	3	9	0	4.91557	0	0
736400	2016	3	10	0.0999201	5.17808	0.155718	1.41231
736400	2016	3	11	2.50028	6.55799	4.39391	9.27694
736402	2016	3	12	0.8996	0.278449	0	1.57759
736402	2016	3	13	1.4	3.06812	1.6906	2.37633
736404	2016	3	14	0	0	0	0
736404	2016	3	15	7.4964	2.89239	2.10648	2.49071
736406	2016	3	16	2.00068	3.12006	1.76276	2.73986
736406	2016	3	17	0	0	0	0
736408	2016	3	18	0.0999201	0	0	0
736408	2016	3	19	0	0	0	0
736410	2016	3	20	0	0	0	0
736410	2016	3	21	0	0	0	0
736412	2016	3	22	0	0	0	0
736412	2016	3	23	1.70152	2.55474	2.56432	2.01128
736414	2016	3	24	0.50056	3.24115	1.67373	1.64135
736414	2016	3	25	1.20012	3.4198	3.64276	0.29396
736416	2016	3	26	0.50008	8.06024	2.4459	0.546983
736416	2016	3	27	0	0	0	0
736418	2016	3	28	0	0	0	0
736418	2016	3	29	0.901199	3.53502	5.2883	0.503813
736420	2016	3	30	4.29992	2.28442	2.01929	2.30707
736420	2016	3	31	0	0	0	0
736422	2016	4	1	0	0	0	0
736422	2016	4	2	0	0	0	0
736424	2016	4	3	0	0	0	0
736424	2016	4	4	0	0	0	0
736426	2016	4	5	0	0	0	0
736426	2016	4	6	0.000479616	1.42607	0	1.67409
736428	2016	4	7	7.30396	5.71839	9.63346	9.95159
736428	2016	4	8	12.3987	6.93132	12.7692	13.2322
736430	2016	4	9	2.59992	17.4281	3.29119	5.98642
736430	2016	4	10	0	0	0	0
736432	2016	4	11	0	0	0	0
736432	2016	4	12	0	0	0	0
736434	2016	4	13	16.1948	2.79243	1.35468	1.65731
736434	2016	4	14	0	0	0	0
736436	2016	4	15	0	0	0	0
736436	2016	4	16	0	0	0	0
736438	2016	4	17	2.39968	1.93062	3.0011	3.04209
736438	2016	4	18	9.9994	4.40062	3.59635	2.75666
736440	2016	4	19	0	0	0	0
736440	2016	4	20	0	0	0	0
736442	2016	4	21	0.10016	1.196	0.987465	0
736442	2016	4	22	0.10016	1.69851	2.04027	0
736444	2016	4	23	5.94968	6.2994	8.20835	6.44887
736444	2016	4	24	4.353	6.08566	1.71015	0
736446	2016	4	25	0.19984	0	0	0.755283
736446	2016	4	26	1.49952	4.35436	2.86143	5.00722
736448	2016	4	27	2.70252	1.94091	3.31478	0
736448	2016	4	28	0.10016	2.13612	0	0
736450	2016	4	29	0.20032	1.47387	0.218026	0
736450	2016	4	30	0.10016	1.15255	1.15685	0.731669
736452	2016	5	1	1.70056	9.80939	8.83265	11.0343
736452	2016	5	2	6.0956	1.44413	1.39542	1.25949
736454	2016	5	3	3.19744	6.4263	6.25365	8.88766
736454	2016	5	4	13.8983	16.7806	8.206	10.4401
736456	2016	5	5	1.1	9.38379	3.11129	3.14907
736456	2016	5	6	0	0	0	0
736458	2016	5	7	0	0	0	0
736458	2016	5	8	0	0	0	0
736460	2016	5	9	0	0	0	0
736460	2016	5	10	0	0	0	0
736462	2016	5	11	0	0	0	0
736462	2016	5	12	18.5036	13.9802	13.5848	18.6159
736464	2016	5	13	40.709	17.3637	18.782	14.051
736464	2016	5	14	0.403277	5.31695	6.81866	7.28573
736466	2016	5	15	4.50264	0	1.45924	0.668876
736466	2016	5	16	4.00036	4.50637	4.11707	2.30639
736468	2016	5	17	2.2008	0.651858	1.14443	0
736468	2016	5	18	0	0	0	0
736470	2016	5	19	0.69944	3.19518	0.205292	0
736470	2016	5	20	0	4.56281	0	0
736472	2016	5	21	0	0	0	0
736472	2016	5	22	0	0	0	0
736474	2016	5	23	20.0859	2.01887	1.46931	2.82706
736474	2016	5	24	3.20008	9.76678	8.4046	10.9119
736476	2016	5	25	1.69904	6.1719	1.97255	0.848219
736476	2016	5	26	0	9.68511	0	0
736478	2016	5	27	3.906	3.53823	1.93324	6.95153
736478	2016	5	28	4.59884	2.64401	0	5.73285
736480	2016	5	29	0	4.1206	0	4.40288
736480	2016	5	30	0.20052	1.36583	0.151356	0.376216
736482	2016	5	31	8.19528	10.2778	9.40276	15.9269
736482	2016	6	1	0.89952	3.42559	0.934267	4.08287
736484	2016	6	2	7.0028	4.82688	8.30696	12.7519
736484	2016	6	3	0	0	0	0
736486	2016	6	4	0	0	0	0
736486	2016	6	5	16.0072	8.19483	9.9964	20.6661
736488	2016	6	6	0	5.36012	5.76748	11.4094
736488	2016	6	7	0	0	0	0
736490	2016	6	8	0	0	0	8.9267
736490	2016	6	9	20.798	7.21601	12.9338	13.9859
736492	2016	6	10	3.29992	2.5295	4.53558	4.33192
736492	2016	6	11	0.600959	2.83423	1.75193	0.00207412
736494	2016	6	12	0	0	4.29859	4.68434
736494	2016	6	13	0	4.02044	0	0
736496	2016	6	14	0	4.17051	0	0
736496	2016	6	15	3.39896	14.0777	7.70139	6.45987
736498	2016	6	16	0	4.35995	4.22398	0
736498	2016	6	17	0	0	0	0
736500	2016	6	18	0	0	0	0
736500	2016	6	19	2.20076	0.862654	0.976078	4.28529
736502	2016	6	20	17.506	10.746	10.3879	11.9454
736502	2016	6	21	0	4.31082	0	0
736504	2016	6	22	0	0	0	0
736504	2016	6	23	0	13.9399	0	0
736506	2016	6	24	0	0	0	0
736506	2016	6	25	0.70032	0	0.289954	0.397126
736508	2016	6	26	4.30192	8.61207	4.62081	4.25926
736508	2016	6	27	14.8029	10.465	4.59866	10.5884
736510	2016	6	28	0	8.74038	0	0
736510	2016	6	29	0	0	0	0
736512	2016	6	30	0.69944	9.36759	1.84953	0.442414
736512	2016	7	1	0	0	0	0
736514	2016	7	2	26.7852	11.5976	8.0403	13.7423
736514	2016	7	3	1.79936	4.04565	4.90273	1.51904
736516	2016	7	4	0	14.1833	0	0
736516	2016	7	5	0	0	0	0
736518	2016	7	6	0	4.30731	0	0
736518	2016	7	7	0	0	0	0
736520	2016	7	8	0	0	0	0
736520	2016	7	9	7.70787	7.03438	3.39903	7.61185
736522	2016	7	10	0	0	0	0
736522	2016	7	11	11.1916	6.7228	2.01222	7.66165
736524	2016	7	12	49.464	8.33552	22.4913	25.303
736524	2016	7	13	14.894	10.4212	7.0435	10.3071
736526	2016	7	14	9.70272	7.99439	6.03222	5.89501
736526	2016	7	15	0	4.05182	0	0
736528	2016	7	16	0	4.08398	0	0
736528	2016	7	17	0	0	0	0
736530	2016	7	18	0	0	0	0
736530	2016	7	19	0	0	0	0
736532	2016	7	20	0	0	0	0
736532	2016	7	21	0	0	0	0
736534	2016	7	22	0	4.27867	0	0
736534	2016	7	23	0	4.02167	0	0
736536	2016	7	24	0	0	0	0
736536	2016	7	25	0	0	0	0
736538	2016	7	26	0	4.39446	0	0
736538	2016	7	27	0	4.4566	0	0
736540	2016	7	28	0	0	0	0
736540	2016	7	29	0	0	0	0
736542	2016	7	30	0	0	0	0
736542	2016	7	31	0	0	0	0
736544	2016	8	1	0	0	0	0
736544	2016	8	2	0	0	0	0
736546	2016	8	3	0	0	0	0
736546	2016	8	4	0	0	0	0
736548	2016	8	5	0	0	0	0
736548	2016	8	6	0	0	0	0
736550	2016	8	7	0	0	0	0
736550	2016	8	8	0	0	0	0
736552	2016	8	9	0	0	0	0
736552	2016	8	10	0	0	0	0
736554	2016	8	11	0	0	0	0
736554	2016	8	12	0	0	0	0
736556	2016	8	13	0	0	0	0
736556	2016	8	14	0	0	0	0
736558	2016	8	15	0	0	0	0
736558	2016	8	16	0	0	0	0
736560	2016	8	17	0	0	0	0
736560	2016	8	18	0	0	0	0
736562	2016	8	19	0	0	0	0
736562	2016	8	20	0	0	0	0
736564	2016	8	21	0	0	4.42576	4.13017
736564	2016	8	22	0	0	0	0
736566	2016	8	23	0	0	0	0
736566	2016	8	24	0	0	0	0
736568	2016	8	25	0	0	0	0
736568	2016	8	26	0	0	0	0
736570	2016	8	27	0	0	0	0
736570	2016	8	28	0	0	0	0
736572	2016	8	29	0.20008	1.21375	0	0.765798
736572	2016	8	30	0	0	0	0
736574	2016	8	31	0	0	0	0
736574	2016	9	1	0	0	0	0
736576	2016	9	2	0	0	0	0
736576	2016	9	3	0	0	0	0
736578	2016	9	4	0.000719424	0.281943	0	0.606689
736578	2016	9	5	19.9079	9.06056	11.5897	14.0932
736580	2016	9	6	19.8006	12.8708	12.9041	9.17806
736580	2016	9	7	0.20016	5.53521	0.118605	3.31551
736582	2016	9	8	0	0	0	0
736582	2016	9	9	0	0	0	0
736584	2016	9	10	0	0	0	0
736584	2016	9	11	0	4.27539	0	0
736586	2016	9	12	0	0	0	0
736586	2016	9	13	0	0	0	0
736588	2016	9	14	0	0	0	0
736588	2016	9	15	0	0	0	0
736590	2016	9	16	0.10016	2.5536	2.25103	0.320551
736590	2016	9	17	13.503	5.07861	10.8641	9.75412
736592	2016	9	18	1.40056	5.3371	3.41199	1.06918
736592	2016	9	19	5.89744	1.48814	2.06545	2.40417
736594	2016	9	20	2.89816	2.17138	0.803074	3.28002
736594	2016	9	21	0	0	0	0
736596	2016	9	22	0	0	0	0
736596	2016	9	23	0	0	0	0
736598	2016	9	24	0	0	0	0
736598	2016	9	25	0	0	0	0
736600	2016	9	26	0	0	0	0
736600	2016	9	27	0	0	0	0
736602	2016	9	28	0	0	0	0
736602	2016	9	29	0	0	0	0
736604	2016	9	30	0	0	0	0
736604	2016	10	1	0	0	0	0
736606	2016	10	2	6.00384	3.35227	5.32545	2.26045
736606	2016	10	3	2.30104	3.00042	6.30588	8.17167
736608	2016	10	4	23.1967	6.13231	11.5413	9.31928
736608	2016	10	5	0	0	0	0
736610	2016	10	6	7.00112	17.4695	14.4823	15.0967
736610	2016	10	7	3.59844	3.93545	2.03586	0
736612	2016	10	8	0	0	0	0
736612	2016	10	9	0	0	0	0
736614	2016	10	10	1.90272	4.05508	4.82113	0
736614	2016	10	11	4.30044	7.45392	7.06804	11.5144
736616	2016	10	12	5.9018	4.09215	5.18333	3.63768
736616	2016	10	13	0	0	0	0
736618	2016	10	14	0	0	0	0
736618	2016	10	15	0	0	0	0
736620	2016	10	16	0	0	0	0
736620	2016	10	17	0	0	0	0
736622	2016	10	18	2.79968	9.77131	7.3447	8.73064
736622	2016	10	19	9.79892	11.0439	6.49016	9.38934
736624	2016	10	20	10.0999	11.7484	12.9974	9.62002
736624	2016	10	21	0	0	0	0
736626	2016	10	22	0	4.05216	0	0
736626	2016	10	23	0.19984	0	0.131639	0.499916
736628	2016	10	24	0	0	0	0
736628	2016	10	25	2.3008	7.20082	4.53531	11.4713
736630	2016	10	26	1.4988	0	0.929373	0
736630	2016	10	27	0.0999201	0	0	0
736632	2016	10	28	0.000119904	0	0.24336	0.416599
736632	2016	10	29	1.29968	2.35862	3.10867	4.26729
736634	2016	10	30	0	0	0	0
736634	2016	10	31	0	0	0	0
736636	2016	11	1	0	0	0	0
736636	2016	11	2	0.799361	0	0.954483	0
736638	2016	11	3	2.30344	1.62235	0.176039	1.21529
736638	2016	11	4	0.10016	0.835451	0	0
736640	2016	11	5	7.9936e-05	5.15921	0.0742802	0
736640	2016	11	6	18.4001	11.7572	18.9672	17.5781
736642	2016	11	7	0.20008	1.35455	0.535656	3.24686
736642	2016	11	8	7.9936e-05	0	0	1.07184
736644	2016	11	9	0.10008	0.869803	0.395835	3.58695
736644	2016	11	10	4.10024	14.0233	12.7151	8.2469
736646	2016	11	11	1.44972	2.93778	0.169533	0.144222
736646	2016	11	12	11.4498	9.99729	5.76797	5.48536
736648	2016	11	13	0	4.23931	0	0
736648	2016	11	14	0.0999201	0	0	0
736650	2016	11	15	1.39956	5.89442	4.23961	5.58658
736650	2016	11	16	9.99952	23.4012	22.1236	20.2904
736652	2016	11	17	1.00024	17.4177	1.68572	7.02485
736652	2016	11	18	0	0	0	0
736654	2016	11	19	0.69992	4.35156	0	2.81052
736654	2016	11	20	0	8.548	0	0
736656	2016	11	21	0	0	0	0
736656	2016	11	22	0	0	0	0
736658	2016	11	23	0	0	0	0
736658	2016	11	24	0	0	0	0
736660	2016	11	25	0.3	3.05379	4.10015	0.924182
736660	2016	11	26	0.49984	1.02458	0.711701	2.17582
736662	2016	11	27	0.70004	4.383	2.44974	0.502041
736662	2016	11	28	0	0	0	0
736664	2016	11	29	0	0	0	0
736664	2016	11	30	0	0	0	0
736666	2016	12	1	1.89992	6.57851	8.27695	7.54137
736666	2016	12	2	1.10176	1.37031	3.06505	0
736668	2016	12	3	0	0	0	0
736668	2016	12	4	0.0999201	0	0.444394	0
736670	2016	12	5	0	0	0	0
736670	2016	12	6	0	0	0	0
736672	2016	12	7	0	0	0	0
736672	2016	12	8	0.10016	4.35352	2.45477	1.01582
736674	2016	12	9	0	4.05339	0	0
736674	2016	12	10	0	0	0	0
736676	2016	12	11	1.59984	4.5313	1.68583	3.92831
736676	2016	12	12	8.29848	13.1116	10.147	7.19002
736678	2016	12	13	0	0	0	0
736678	2016	12	14	1.19952	4.28899	0	1.25608
736680	2016	12	15	0	4.05766	0	0
736680	2016	12	16	0	0	0	0
736682	2016	12	17	0	0	0	0
736682	2016	12	18	2.30032	5.13543	2.19038	3.84579
736684	2016	12	19	0.59976	3.48975	5.21689	0
736684	2016	12	20	0	0	0	0
736686	2016	12	21	0	4.28813	0	0
736686	2016	12	22	0	4.24624	0	0
736688	2016	12	23	0.0999201	0.587644	0	1.25103
736688	2016	12	24	2.30056	8.46471	7.558	5.54865
736690	2016	12	25	6.401	12.2112	2.5555	2.09588
736690	2016	12	26	0.79984	4.98212	6.04506	4.45915
736692	2016	12	27	0.000239808	0	0	0.598516
736692	2016	12	28	12.102	5.33901	2.49015	2.7732
736694	2016	12	29	0	0	0	0
